# Supplementary material
Source: PubMed Central journal article supplement (PMC6639159)
Supplement: NIHMS1030267-supplement-Suppl_Tables.pdf [file NIHMS1030267-supplement-Suppl_Tables.pdf]

**Supplementary Table 1a: Summary of comprehensive blood chemistry analysis**

|                 | Normal range (unit) | WT_SAL        | Shank3_UNC0642 |
|-----------------|---------------------|---------------|----------------|
| ALB             | 2.5-4.8 g/dl        | 2.13 ±0.36    | 1.8 ±0.15      |
| ALKP            | 62-209 U/L          | 199.0 ±59.1   | 165.3 ±19.8    |
| ALT             | 28-132 U/L          | 92.7 ±7.1     | 82.7 ±18.5     |
| AMYL            | 1691-3615 U/L       | 2404.0 ±106.0 | 1766.7 ±279.4  |
| BUN             | 10.0-33.0 mg/dl     | 22.3 ±2.16    | 15.0 ±1.9      |
| Calcium         | 5.9-9.4 mg/dl       | 11.1 ±0.66    | 9.9 ±1.0       |
| Cholesterol     | 50-250 mg/dl        | 129.0 ±9.3    | 105.3 ±6.2     |
| Creatine        | 0.2-0.8 mg/dl       | 0.0 ±0.0      | 0.0 ±0.0       |
| Glucose         | 190-280 mg/dl       | 218.3 ±14.7   | 202.3 ±28.1    |
| Phosphorus      | 6.1-10.1 mg/dl      | 9.8 ±1.2      | 7.5 ±0.58      |
| Total bilirubin | 0-1 mg/dl           | n.d.          | 0.1            |
| Total protein   | 3.6-6.6 g/dl        | 5.9 ±0.21     | 5.2 ±0.51      |
| Globulin        | g/dl                | 3.8 ±0.36     | 3.4 ±0.39      |

ALB: albumin; ALKP: Alkaline phosphatase; ALT: alanine aminotransferase; AMYL, amylase; BUN, blood urea nitrogen; n=3/group.

**Supplementary Table 1b: Summary of comprehensive blood chemistry analysis**

|                             | Normal range (unit)         | WT_SAL      | Shank3_UNC0642 |
|-----------------------------|-----------------------------|-------------|----------------|
| White blood cell            | 6-15 10 <sup>9</sup> /L     | 7.2 ±0.57   | 6.2 ±1.5       |
| Lymphocyte                  | 3.4-7.44 10 <sup>9</sup> /L | 6.0 ±0.46   | 5.1 ±1.3       |
| Monocyte                    | 0-0.6 10 <sup>9</sup> /L    | 0.07 ±0.02  | 0.11 ±0.04     |
| Neutrophil                  | 0.5-3.8 10 <sup>9</sup> /L  | 1.1 ±0.17   | 1.1 ±0.23      |
| Eosinophil                  | 10 <sup>9</sup> /L          | n.d.        | n.d.           |
| Basophil                    | 10 <sup>9</sup> /L          | n.d.        | n.d.           |
| Lymphocyte%                 | 57-93 %                     | 83.5 ±1.5   | 80.6 ±2.6      |
| Monocyte%                   | 0-7 %                       | 1.0 ±0.30   | 1.7 ±0.23      |
| Neutrophil%                 | 8-48 %                      | 15.4 ±1.7   | 17.6 ±2.6      |
| Eosinophil %                | %                           | n.d.        | n.d.           |
| Basophil %                  | %                           | n.d.        | n.d.           |
| Red blood cell              | 7-12 10 <sup>12</sup> /L    | 9.7 ±0.06   | 10.6 ±0.40     |
| Hemoglobin                  | 12.2-16.2 g/dl              | 13.8 ±0.11  | 15.1 ±0.29     |
| Hematocrit                  | 35-45 %                     | 43.4 ±0.07  | 46.1 ±1.4      |
| Mean corpuscular vol        | 45-55 fl                    | 44.8 ±0.29  | 44.0 ±0.0      |
| Mean corpuscular Hb.        | 11.1-12.7 pg                | 14.2 ±0.14  | 14.4 ±0.18     |
| Mean corpuscular Hb conc.   | 22.3-32 g/dl                | 31.8 ±0.31  | 32.9 ±0.39     |
| Red cell distribution width | %                           | 21.7 ±0.41  | 18.9 ±0.29     |
| Platelet                    | 200-450 10 <sup>9</sup> /L  | 422.0 ±47.2 | 485.3 ±29.5    |
| Procalcitonin               | %                           | 0.28 ±0.03  | 0.31 ±0.02     |
| Mean platelet vol.          | fl                          | 6.6 ±0.06   | 6.4 ±0.11      |
| Platelet distribution width | %                           | 29.1 ±0.54  | 29.1 ±0.39     |

Hb, hemoglobin; n.d., not detected; n=3/group

**Suppl. Table 2 List of genes down-regulated in *Shank3*-deficient mice and recovered by UNC0642 treatment [ Het+SAL\_vs\_WT (fold change < -1.2 & P < 0.05) and Het+UNC\_vs\_Het+SAL (fold change > 1.1 & P < 0.05)]**

| Gene Symbol   | logFC (SAL_vs_WT) | Fold change (SAL_vs_WT) | P.Value (SAL_vs_WT) | logFC (UNC_vs_SAL) | Fold change (UNC_vs_SAL) | P.Value (UNC_vs_SAL) | Restored |
|---------------|-------------------|-------------------------|---------------------|--------------------|--------------------------|----------------------|----------|
| Dynlt1b       | -1.686232856      | -3.218152862            | 0.001903647         | 1.772854827        | 3.417295077              | 0.001270009          | yes      |
| Acan          | -1.360379681      | -2.567527414            | 0.00060683          | 1.241511211        | 2.364460778              | 0.001330884          | yes      |
| 3930402G23Rik | -1.254679845      | -2.386141907            | 0.013584285         | 0.985397006        | 1.979858062              | 0.044904906          | yes      |
| Gas2l3        | -1.211515426      | -2.315807645            | 0.007269459         | 1.000375133        | 2.000520113              | 0.022021224          | yes      |
| Klk6          | -1.157947088      | -2.231396805            | 0.026018677         | 1.332903634        | 2.519091689              | 0.012191891          | yes      |
| Gm19710       | -1.042140987      | -2.0592814              | 0.017963941         | 0.908666989        | 1.877310113              | 0.035416621          | yes      |
| Lrrc26        | -0.971444044      | -1.960802249            | 0.003848454         | 0.861946234        | 1.817488497              | 0.008590058          | yes      |
| Lrrc38        | -0.903285261      | -1.870320174            | 0.00633933          | 0.995029083        | 1.993120704              | 0.003226762          | yes      |
| A330032B11Rik | -0.868251252      | -1.82544886             | 0.003419838         | 0.617553432        | 1.534271109              | 0.026842111          | yes      |
| Zfhx3         | -0.862181774      | -1.817785252            | 0.039478841         | 0.909606387        | 1.878532905              | 0.031109227          | yes      |
| Elf4          | -0.861836542      | -1.817350315            | 0.02838555          | 0.881330531        | 1.842073377              | 0.025446792          | yes      |
| Pim1          | -0.858364134      | -1.812981413            | 0.002715471         | 0.62890375         | 1.546389504              | 0.019708153          | yes      |
| Gas2l2        | -0.833230752      | -1.781670748            | 0.010578015         | 0.772950662        | 1.708761044              | 0.016313643          | yes      |
| Hmmr          | -0.831523028      | -1.779563024            | 0.001861283         | 0.506037873        | 1.420144639              | 0.038212941          | yes      |
| Gm19522       | -0.820873623      | -1.766475357            | 0.012864953         | 0.639424371        | 1.557707517              | 0.044673195          | yes      |
| Tmem181b-ps   | -0.812906234      | -1.756746755            | 0.000386121         | 0.447553049        | 1.363725283              | 0.019620031          | yes      |
| Fndc8         | -0.797516369      | -1.738106361            | 0.02356772          | 0.678350922        | 1.600309469              | 0.049300458          | yes      |
| Prkd2         | -0.79169896       | -1.73111187             | 0.003595224         | 0.650156365        | 1.569338277              | 0.012938932          | yes      |
| Cenpf         | -0.786416284      | -1.724784699            | 0.030758435         | 0.749214699        | 1.680877631              | 0.038379238          | yes      |
| C920021L13Rik | -0.771945453      | -1.707570866            | 0.042234534         | 0.96098336         | 1.946636295              | 0.014230578          | yes      |
| Adamts15      | -0.758345339      | -1.691549433            | 0.003947203         | 0.500688411        | 1.414888544              | 0.041432088          | yes      |
| Adgrl4        | -0.75752285       | -1.690585346            | 0.000328105         | 0.563949763        | 1.478310953              | 0.003785073          | yes      |
| Adamts6       | -0.737025764      | -1.666736179            | 0.023362888         | 0.698144163        | 1.622416425              | 0.03045906           | yes      |
| St6galnac2    | -0.733841953      | -1.663061999            | 0.017644839         | 0.636774932        | 1.554849488              | 0.035658954          | yes      |
| Gabra2        | -0.73113798       | -1.659947922            | 0.000165951         | 0.331349817        | 1.258190014              | 0.038298089          | yes      |
| Nfkb2         | -0.719153459      | -1.646215788            | 0.009995371         | 0.546661821        | 1.460701938              | 0.041366423          | yes      |
| Sdf2l1        | -0.7125632        | -1.638712993            | 0.001197558         | 0.486672869        | 1.401209689              | 0.016251805          | yes      |
| Icam1         | -0.695441702      | -1.619380154            | 0.036296529         | 0.766611044        | 1.701268729              | 0.022752579          | yes      |
| Zbtb40        | -0.692013546      | -1.615536724            | 0.004988962         | 0.468279227        | 1.383458365              | 0.04118306           | yes      |
| Megf10        | -0.687489041      | -1.610478099            | 0.002438207         | 0.552007809        | 1.466124693              | 0.010369724          | yes      |
| 5730559C18Rik | -0.680590814      | -1.602796               | 0.012049682         | 0.584096323        | 1.499099687              | 0.027349106          | yes      |
| Bank1         | -0.665442935      | -1.586055148            | 0.034048215         | 0.633853136        | 1.55170374               | 0.042251221          | yes      |
| Blnk          | -0.621441449      | -1.538411496            | 0.001816217         | 0.361958935        | 1.285169756              | 0.045558767          | yes      |
| Flt1          | -0.618475612      | -1.535252138            | 0.001013797         | 0.438968816        | 1.355635024              | 0.011075583          | yes      |
| Mdga1         | -0.613171634      | -1.529618242            | 0.000390838         | 0.397369405        | 1.317104126              | 0.01075464           | yes      |
| Zfp217        | -0.601524832      | -1.517319424            | 0.023623135         | 0.534544881        | 1.448485137              | 0.041077119          | yes      |

|               |              |              |             |             |             |             |     |
|---------------|--------------|--------------|-------------|-------------|-------------|-------------|-----|
| Gm10658       | -0.594932553 | -1.510401972 | 0.039531825 | 0.646255851 | 1.565101098 | 0.026947525 | yes |
| Cep76         | -0.593053956 | -1.50843649  | 0.002601643 | 0.379920531 | 1.301270174 | 0.036867445 | yes |
| Inf2          | -0.566895812 | -1.481332816 | 9.58E-05    | 0.288177346 | 1.221096609 | 0.018415998 | yes |
| Pik3c2b       | -0.54461455  | -1.458630585 | 0.001551663 | 0.472764236 | 1.387765913 | 0.004506321 | yes |
| Pon2          | -0.526513682 | -1.440444108 | 0.00376161  | 0.326687725 | 1.254130715 | 0.049618418 | yes |
| D630045J12Rik | -0.512322708 | -1.426344733 | 0.001554162 | 0.326484692 | 1.253954231 | 0.026268065 | yes |
| Cachd1        | -0.50261879  | -1.416782984 | 0.028866374 | 0.51251814  | 1.426537963 | 0.026263119 | yes |
| Mcm4          | -0.502247956 | -1.416418858 | 0.004990877 | 0.512053819 | 1.426078915 | 0.004362853 | yes |
| Mme           | -0.495187168 | -1.409503606 | 0.023869479 | 0.424080888 | 1.341717449 | 0.048437277 | yes |
| Col4a2        | -0.491861306 | -1.406258002 | 0.000251513 | 0.291748167 | 1.224122695 | 0.0137686   | yes |
| Ankdd1b       | -0.488133143 | -1.40262869  | 0.042542254 | 0.721140984 | 1.648485256 | 0.004908205 | yes |
| Itga6         | -0.47346961  | -1.388444596 | 0.008037582 | 0.339018856 | 1.264896075 | 0.04531925  | yes |
| Pvalb         | -0.472882842 | -1.387880008 | 0.002406593 | 0.374869226 | 1.296722007 | 0.011579351 | yes |
| Fgfr2         | -0.471051537 | -1.386119401 | 0.005561295 | 0.362821475 | 1.285938347 | 0.024987466 | yes |
| Lrrc14b       | -0.449231523 | -1.365312805 | 0.001434953 | 0.288971466 | 1.221768937 | 0.025305264 | yes |
| Kif13b        | -0.447583197 | -1.363753781 | 0.005435071 | 0.348870427 | 1.273563087 | 0.023620515 | yes |
| Pvrl1         | -0.441625852 | -1.358134021 | 0.005632311 | 0.306925266 | 1.237068395 | 0.040723211 | yes |
| Eng           | -0.439292183 | -1.355938912 | 0.00322736  | 0.298926772 | 1.230228899 | 0.031929335 | yes |
| Nefh          | -0.432832568 | -1.349881316 | 0.00406597  | 0.27496188  | 1.209962118 | 0.048855034 | yes |
| Sgpp2         | -0.429772127 | -1.347020799 | 0.010221349 | 0.34958862  | 1.274197242 | 0.030979597 | yes |
| Lrp8          | -0.422080573 | -1.33985843  | 0.002808045 | 0.261760583 | 1.198940932 | 0.04335402  | yes |
| Mpp3          | -0.41321226  | -1.331647521 | 0.002423887 | 0.311329972 | 1.240851072 | 0.015615785 | yes |
| Eya1          | -0.412097784 | -1.330619226 | 0.026328452 | 0.382232819 | 1.303357465 | 0.037445887 | yes |
| Itpkb         | -0.407566847 | -1.32644683  | 0.005934935 | 0.401803213 | 1.321158185 | 0.006523489 | yes |
| Olig2         | -0.39747201  | -1.317197803 | 0.01914607  | 0.390205948 | 1.310580479 | 0.021079485 | yes |
| Phka1         | -0.384075152 | -1.305022927 | 0.019876556 | 0.382845363 | 1.303910967 | 0.02021281  | yes |
| Wdfy1         | -0.377366915 | -1.298968922 | 0.014050186 | 0.408731762 | 1.327518312 | 0.008803945 | yes |
| Plxd1         | -0.375328069 | -1.29713449  | 0.001687297 | 0.284802141 | 1.218243175 | 0.01148895  | yes |
| Sh3pxd2b      | -0.374704875 | -1.296574294 | 0.004497927 | 0.261793901 | 1.19896862  | 0.034994252 | yes |
| Shc3          | -0.374682965 | -1.296554603 | 0.018953276 | 0.319873107 | 1.248220756 | 0.040162089 | yes |
| Pygm          | -0.372616069 | -1.294698407 | 0.013256463 | 0.336580516 | 1.262760043 | 0.023004126 | yes |
| Kcnc3         | -0.363510499 | -1.28655265  | 0.000312396 | 0.242215308 | 1.18280751  | 0.00781202  | yes |
| Gng5          | -0.361987264 | -1.285194992 | 0.011775216 | 0.331035223 | 1.257915683 | 0.019419779 | yes |
| Gm10336       | -0.359581479 | -1.283053634 | 0.034388676 | 0.385733949 | 1.306524292 | 0.024581573 | yes |
| Prkca         | -0.358920398 | -1.28246584  | 0.001142973 | 0.282051964 | 1.215923078 | 0.006869906 | yes |
| Anxa11        | -0.358318557 | -1.281930952 | 0.005117079 | 0.275493913 | 1.210408407 | 0.024207185 | yes |
| Usp31         | -0.352440018 | -1.276718105 | 0.002361915 | 0.239936948 | 1.180941048 | 0.026101465 | yes |
| Arhgap31      | -0.349363548 | -1.273998472 | 0.022589004 | 0.306667658 | 1.236847524 | 0.041422819 | yes |
| Fat3          | -0.342910528 | -1.26831274  | 0.00259487  | 0.249897863 | 1.189122927 | 0.019640623 | yes |

|               |              |              |             |             |             |             |     |
|---------------|--------------|--------------|-------------|-------------|-------------|-------------|-----|
| Rasd2         | -0.339658024 | -1.265456595 | 0.001699513 | 0.2765827   | 1.211322234 | 0.007468324 | yes |
| Cabp1         | -0.339528877 | -1.265343319 | 0.001334549 | 0.255391614 | 1.193659713 | 0.010180018 | yes |
| Igfn1         | -0.338949857 | -1.26483558  | 0.020937428 | 0.367001886 | 1.289669937 | 0.013556446 | yes |
| Klhl29        | -0.33696479  | -1.263096435 | 0.002917143 | 0.264515081 | 1.201232224 | 0.014235335 | yes |
| Hivep2        | -0.333360343 | -1.259944638 | 0.003547895 | 0.229391986 | 1.17234077  | 0.032198239 | yes |
| Unc79         | -0.332246007 | -1.258971834 | 0.002635943 | 0.272675121 | 1.208045775 | 0.010123106 | yes |
| Manf          | -0.330194326 | -1.257182701 | 0.004945523 | 0.21543951  | 1.161057571 | 0.049839203 | yes |
| Arhgef40      | -0.329495554 | -1.25657393  | 0.017650485 | 0.358033015 | 1.281677254 | 0.010996038 | yes |
| Hus1          | -0.325440702 | -1.25304715  | 0.033519125 | 0.323024995 | 1.250950753 | 0.034682491 | yes |
| Cacng2        | -0.316839195 | -1.245598571 | 0.006571596 | 0.264530105 | 1.201244732 | 0.019170058 | yes |
| Plec          | -0.314430032 | -1.243520276 | 0.006252312 | 0.226690185 | 1.170147329 | 0.037704421 | yes |
| Sipa1l1       | -0.309205976 | -1.239025583 | 0.002746367 | 0.199466899 | 1.148273969 | 0.036902658 | yes |
| Phtf1         | -0.307609167 | -1.237654958 | 0.004699608 | 0.266219729 | 1.202652405 | 0.01187511  | yes |
| Ncor2         | -0.305762593 | -1.236071839 | 0.003811518 | 0.213011715 | 1.159105364 | 0.031841526 | yes |
| Zdhhc14       | -0.303429075 | -1.234074143 | 0.024045384 | 0.330120888 | 1.257118708 | 0.015383895 | yes |
| Pknox1        | -0.302824315 | -1.233556944 | 0.031127875 | 0.374814277 | 1.296672619 | 0.009868674 | yes |
| Ssh3          | -0.299508416 | -1.230724985 | 0.017202735 | 0.240800244 | 1.181647924 | 0.048568782 | yes |
| Gpc5          | -0.299057896 | -1.230340718 | 0.02532466  | 0.274635936 | 1.209688786 | 0.037783286 | yes |
| Ppp1r16b      | -0.297742682 | -1.229219605 | 0.00500573  | 0.201307998 | 1.149740277 | 0.043276835 | yes |
| Hip1          | -0.292252375 | -1.224550588 | 0.013810956 | 0.242811102 | 1.183296077 | 0.035565593 | yes |
| Kcnip2        | -0.290653066 | -1.223193857 | 0.008456357 | 0.262153634 | 1.199267618 | 0.015586447 | yes |
| Cdh22         | -0.290233216 | -1.222837937 | 0.012296802 | 0.281309367 | 1.215297369 | 0.01471312  | yes |
| Plcl1         | -0.28992928  | -1.222580346 | 0.021610006 | 0.255045451 | 1.193373338 | 0.039791713 | yes |
| Nwd1          | -0.289666042 | -1.222357291 | 0.026560005 | 0.26927757  | 1.20520417  | 0.037263261 | yes |
| Fam84a        | -0.286695574 | -1.219843081 | 0.003182388 | 0.205756779 | 1.153291158 | 0.024457126 | yes |
| Pou3f2        | -0.286393192 | -1.219587435 | 0.008011587 | 0.222494483 | 1.166749204 | 0.031974749 | yes |
| Zfpm1         | -0.281449746 | -1.215415627 | 0.008390224 | 0.278460741 | 1.212900111 | 0.008970335 | yes |
| 9430015G10Rik | -0.275310566 | -1.21025459  | 0.034367852 | 0.253688928 | 1.192251773 | 0.048979731 | yes |
| Rasa3         | -0.272425624 | -1.207836875 | 0.011800756 | 0.270531213 | 1.206251899 | 0.012294802 | yes |
| Ankrd63       | -0.272392551 | -1.207809187 | 0.025029286 | 0.240005057 | 1.180996801 | 0.044758334 | yes |
| Osgin2        | -0.265105373 | -1.201723819 | 0.031854393 | 0.271284735 | 1.20688209  | 0.02855991  | yes |
| Tspan12       | -0.264281658 | -1.201037884 | 0.038887308 | 0.255941844 | 1.19411505  | 0.044657793 | yes |
| Gm3636        | -1.527102718 | -2.88206469  | 0.047699908 | 0.848735199 | 1.800921377 | 0.249191998 | no  |
| Rxfp2         | -1.084176686 | -2.120165207 | 0.006213568 | 0.603165345 | 1.519045776 | 0.099585938 | no  |
| Nlrp3         | -1.047799073 | -2.067373525 | 0.029386382 | 0.804002118 | 1.745937746 | 0.085309594 | no  |
| Plekhg4       | -1.023446817 | -2.032769758 | 0.005517209 | 0.53611268  | 1.450060084 | 0.113291648 | no  |
| Robo3         | -1.002073512 | -2.002876565 | 0.004396831 | 0.47456091  | 1.389495257 | 0.118151464 | no  |
| Runx1         | -0.962826635 | -1.949125027 | 0.045881779 | 0.778794883 | 1.715697112 | 0.099270598 | no  |
| Npc1l1        | -0.942629411 | -1.922028077 | 0.0086858   | 0.518970757 | 1.432932605 | 0.120032107 | no  |

|               |              |              |             |             |             |             |    |
|---------------|--------------|--------------|-------------|-------------|-------------|-------------|----|
| Slc25a13      | -0.932712313 | -1.908861346 | 0.011607286 | 0.563244348 | 1.4775883   | 0.105130234 | no |
| Xirp2         | -0.927229125 | -1.901620188 | 0.021105038 | 0.447194643 | 1.363386538 | 0.235544301 | no |
| Adam33        | -0.906193596 | -1.874094363 | 0.042789843 | 0.4527486   | 1.368645296 | 0.286465203 | no |
| Rad54b        | -0.899913044 | -1.865953512 | 0.044426019 | 0.606528153 | 1.522590681 | 0.161232596 | no |
| Vav3          | -0.885497038 | -1.847400979 | 0.014147796 | 0.511437724 | 1.425470046 | 0.128936742 | no |
| E330020D12Rik | -0.88051123  | -1.841027568 | 0.0239304   | 0.569744041 | 1.484260214 | 0.126424928 | no |
| Flt3          | -0.874450806 | -1.833310063 | 0.005510419 | 0.437355698 | 1.354120098 | 0.129192543 | no |
| 1810009A15Rik | -0.873724999 | -1.832387973 | 0.025562828 | 0.741409442 | 1.671808316 | 0.053153316 | no |
| Scn4b         | -0.858324121 | -1.81293113  | 0.034629076 | 0.441297737 | 1.357825173 | 0.223651803 | no |
| Jph2          | -0.847085718 | -1.798863501 | 0.029994343 | 0.731107823 | 1.659913224 | 0.0566207   | no |
| Moap1         | -0.836460071 | -1.785663295 | 0.045623323 | 0.377820477 | 1.299377364 | 0.342697142 | no |
| Tmem170       | -0.832102272 | -1.780277665 | 0.021502565 | 0.451173341 | 1.367151706 | 0.186740308 | no |
| Gm20219       | -0.83022059  | -1.777957194 | 0.030640497 | 0.523922096 | 1.437858888 | 0.154478308 | no |
| Kif4          | -0.8019697   | -1.743479862 | 0.02366318  | 0.60424314  | 1.520181033 | 0.078118688 | no |
| Ska3          | -0.797046387 | -1.737540236 | 0.010542148 | 0.499989366 | 1.414203138 | 0.088547611 | no |
| Irf7          | -0.792319934 | -1.731857147 | 0.014048279 | 0.606556461 | 1.522620556 | 0.051132988 | no |
| Sbk3          | -0.790364973 | -1.729511939 | 0.033340227 | 0.562829894 | 1.477163884 | 0.117081866 | no |
| Tmem210       | -0.787544115 | -1.72613358  | 0.046708368 | 0.630961814 | 1.548597066 | 0.103619049 | no |
| Psg23         | -0.782478374 | -1.720083229 | 0.04905449  | 0.564656086 | 1.47903489  | 0.144101119 | no |
| Greb1         | -0.779837537 | -1.716937517 | 0.025588759 | 0.516809362 | 1.430787443 | 0.122753726 | no |
| Nusap1        | -0.769628605 | -1.70483085  | 0.027132285 | 0.634482004 | 1.552380271 | 0.062327254 | no |
| Pq1c3         | -0.764887515 | -1.699237506 | 0.013092076 | 0.4036738   | 1.322872299 | 0.160881803 | no |
| Bag3          | -0.735106185 | -1.664519977 | 0.021113483 | 0.469347732 | 1.384483377 | 0.121433763 | no |
| Tanc1         | -0.729566189 | -1.658140422 | 0.002275916 | 0.273432535 | 1.208680164 | 0.188793754 | no |
| Gm14827       | -0.718577232 | -1.645558405 | 0.033866254 | 0.359392635 | 1.282885698 | 0.259238464 | no |
| Tbc1d2        | -0.715712589 | -1.642294194 | 0.004309248 | 0.439384927 | 1.356026081 | 0.058671237 | no |
| 9530052E02Rik | -0.712079531 | -1.638163699 | 0.021767178 | 0.431302293 | 1.348450248 | 0.143704299 | no |
| Fam60a        | -0.707841183 | -1.633358166 | 0.044528824 | 0.332173453 | 1.258908521 | 0.322058281 | no |
| Bfsp2         | -0.702266408 | -1.627058821 | 0.022109161 | 0.511811811 | 1.425839715 | 0.083204865 | no |
| Adgrg6        | -0.695270914 | -1.619188461 | 0.004730527 | 0.346079037 | 1.271101324 | 0.123047168 | no |
| Stc1          | -0.684270947 | -1.606889749 | 0.045118099 | 0.454135937 | 1.369962058 | 0.168824031 | no |
| Stac3         | -0.674504946 | -1.596049002 | 0.020218184 | 0.53171539  | 1.445647074 | 0.05923168  | no |
| Dok3          | -0.674452688 | -1.59599119  | 0.007365405 | 0.272130564 | 1.207589873 | 0.234379985 | no |
| Gpr63         | -0.672974186 | -1.594356425 | 0.041749596 | 0.298338311 | 1.229727204 | 0.341406782 | no |
| Tbc1d4        | -0.672240957 | -1.593546322 | 0.025545245 | 0.364910198 | 1.287801466 | 0.197801756 | no |
| 5730507C01Rik | -0.667226039 | -1.58801665  | 0.019842442 | 0.287478809 | 1.220505511 | 0.282169646 | no |
| Banp          | -0.665869436 | -1.5865241   | 0.012898133 | 0.273634722 | 1.208849567 | 0.252559259 | no |
| Kif23         | -0.6628973   | -1.583259022 | 0.045656592 | 0.574574195 | 1.489237857 | 0.07876986  | no |
| Tmem181a      | -0.661178017 | -1.58137335  | 0.009551363 | 0.302310038 | 1.233117296 | 0.178471644 | no |

|          |              |              |             |             |             |             |    |
|----------|--------------|--------------|-------------|-------------|-------------|-------------|----|
| AA986860 | -0.659096016 | -1.579092863 | 0.026011598 | 0.372052471 | 1.294192723 | 0.185673558 | no |
| Polq     | -0.652755596 | -1.572168223 | 0.014914022 | 0.377419305 | 1.299016094 | 0.134928216 | no |
| Slc39a2  | -0.652184003 | -1.571545457 | 0.031269055 | 0.319358516 | 1.247775611 | 0.262355685 | no |
| Pcdhgb2  | -0.625694361 | -1.542953262 | 0.00634785  | 0.420881794 | 1.338745563 | 0.051165312 | no |
| Acer2    | -0.624022189 | -1.54116592  | 0.01185421  | 0.397911068 | 1.317598729 | 0.08951067  | no |
| Tmem86b  | -0.621875455 | -1.538874366 | 0.019028895 | 0.444864669 | 1.361186425 | 0.080807241 | no |
| Col11a1  | -0.620833668 | -1.537763528 | 0.027739773 | 0.4863359   | 1.400882448 | 0.076267336 | no |
| Sh3bp1   | -0.615882477 | -1.532495117 | 0.002352303 | 0.358942139 | 1.282485166 | 0.052072522 | no |
| Erbp3    | -0.613277525 | -1.529730517 | 0.043871868 | 0.376042133 | 1.297776667 | 0.19676018  | no |
| Grk4     | -0.610388577 | -1.526670349 | 0.038984154 | 0.311261252 | 1.240791968 | 0.263572372 | no |
| Egfl8    | -0.603976263 | -1.519899849 | 0.049330002 | 0.49303836  | 1.407405796 | 0.101878277 | no |
| Prkg2    | -0.603619458 | -1.519523996 | 0.027147838 | 0.385002594 | 1.305862135 | 0.136436613 | no |
| Abcc9    | -0.602315309 | -1.518151017 | 0.020122158 | 0.478482096 | 1.393276985 | 0.057000038 | no |
| Cfp      | -0.601741723 | -1.517547551 | 0.005807347 | 0.28765802  | 1.220657131 | 0.148751143 | no |
| Lonrf3   | -0.59635383  | -1.511890683 | 0.031641834 | 0.478570671 | 1.393362529 | 0.074845132 | no |
| Paqr5    | -0.592379246 | -1.5077312   | 0.032745351 | 0.346185481 | 1.271195111 | 0.191332059 | no |
| Onecut2  | -0.57790406  | -1.492679116 | 0.043966449 | 0.229717309 | 1.172605159 | 0.398192969 | no |
| Card10   | -0.576520023 | -1.491247814 | 0.019246901 | 0.243043919 | 1.183487049 | 0.289650301 | no |
| Lrrc1    | -0.573649204 | -1.48828333  | 0.03658407  | 0.35329737  | 1.277477047 | 0.179609576 | no |
| Prss23   | -0.569272201 | -1.483774859 | 0.000721364 | 0.266968975 | 1.203277149 | 0.069028571 | no |
| Cdh24    | -0.564351914 | -1.47872309  | 0.012655415 | 0.269992262 | 1.20580136  | 0.198621313 | no |
| Tlr13    | -0.560647609 | -1.474931148 | 0.046309957 | 0.492285735 | 1.406671772 | 0.076194533 | no |
| Il1r1    | -0.557730482 | -1.471951853 | 0.025787968 | 0.30508641  | 1.235492635 | 0.198189391 | no |
| Serpinb8 | -0.546889443 | -1.46093242  | 0.013367054 | 0.257912145 | 1.195746978 | 0.20903222  | no |
| Cbfa2t3  | -0.54070776  | -1.454685985 | 0.002553356 | 0.21408256  | 1.159966033 | 0.171694752 | no |
| Kcng4    | -0.529281097 | -1.443209857 | 0.029128692 | 0.244183785 | 1.184422486 | 0.285931025 | no |
| Arc      | -0.528653267 | -1.44258194  | 0.016827728 | 0.161092925 | 1.118133868 | 0.404597411 | no |
| Pp2d1    | -0.526558301 | -1.440488657 | 0.021647341 | 0.320182392 | 1.248488378 | 0.141211398 | no |
| Aldh1a1  | -0.525452676 | -1.439385146 | 0.00348305  | 0.319643406 | 1.248022035 | 0.054129494 | no |
| Rrp1b    | -0.525023672 | -1.438957191 | 0.024749017 | 0.272337291 | 1.207762925 | 0.216366608 | no |
| Rmi2     | -0.524496811 | -1.43843179  | 0.029910406 | 0.320575547 | 1.248828655 | 0.165032518 | no |
| Rasd1    | -0.523735197 | -1.437672628 | 0.035719482 | 0.296848456 | 1.228457934 | 0.212590917 | no |
| Cyp26b1  | -0.5216991   | -1.435645049 | 0.014333716 | 0.370772447 | 1.293044967 | 0.068939765 | no |
| Pnpla3   | -0.51813419  | -1.43210194  | 0.006235893 | 0.223000416 | 1.167158438 | 0.195439637 | no |
| Oxtr     | -0.515255245 | -1.429246983 | 0.014696241 | 0.311995998 | 1.241424048 | 0.117734277 | no |
| Dio2     | -0.513612889 | -1.427620862 | 0.018960726 | 0.33549851  | 1.261813342 | 0.098821661 | no |
| Fndc3b   | -0.50915008  | -1.423211506 | 0.003546092 | 0.25476251  | 1.193139318 | 0.10761695  | no |
| Nos3     | -0.507491319 | -1.421576088 | 0.009888233 | 0.288134969 | 1.221060741 | 0.116682739 | no |
| Cxcr2    | -0.499019361 | -1.413252609 | 0.046195312 | 0.444415155 | 1.360762373 | 0.072325746 | no |

|               |              |              |             |             |             |             |    |
|---------------|--------------|--------------|-------------|-------------|-------------|-------------|----|
| Aoc2          | -0.494047459 | -1.408390556 | 0.039556152 | 0.351770743 | 1.276125965 | 0.130396658 | no |
| Al414108      | -0.492167734 | -1.406556723 | 0.007838142 | 0.232905491 | 1.17519934  | 0.161341811 | no |
| Cys1          | -0.488191103 | -1.402685042 | 0.03977813  | 0.145246049 | 1.10591925  | 0.515156384 | no |
| F730043M19Rik | -0.487825309 | -1.402329437 | 0.049371881 | 0.225594105 | 1.169258653 | 0.340595515 | no |
| Osbp13        | -0.48775825  | -1.402264256 | 0.005169208 | 0.263515796 | 1.200400476 | 0.097438694 | no |
| Faap100       | -0.485641367 | -1.400208206 | 0.008842863 | 0.320955257 | 1.249157384 | 0.066832642 | no |
| Col15a1       | -0.483857289 | -1.398477739 | 0.04720866  | 0.288194747 | 1.221111338 | 0.219053212 | no |
| Mirg          | -0.480644249 | -1.395366641 | 0.026100276 | 0.160209417 | 1.117449332 | 0.424579835 | no |
| Pfkfb3        | -0.479187658 | -1.393958545 | 0.005624211 | 0.233168853 | 1.175413891 | 0.136144821 | no |
| Cobll1        | -0.476941586 | -1.391790038 | 0.034793246 | 0.368604312 | 1.291103191 | 0.093828445 | no |
| Gse1          | -0.475364832 | -1.39026975  | 0.000674159 | 0.217293951 | 1.162550955 | 0.073037263 | no |
| Homer1        | -0.473185673 | -1.388171364 | 0.042254061 | 0.214186794 | 1.160049843 | 0.314778722 | no |
| Gfod1         | -0.472958182 | -1.387952487 | 0.003218064 | 0.225944664 | 1.169542804 | 0.112450535 | no |
| Luzp1         | -0.466341908 | -1.381601839 | 0.004902437 | 0.212724051 | 1.158874269 | 0.150644344 | no |
| Egr3          | -0.464719573 | -1.380049077 | 0.037571932 | 0.205549131 | 1.153125176 | 0.313926349 | no |
| Abcc4         | -0.463927951 | -1.379292038 | 0.02049145  | 0.217157618 | 1.1624411   | 0.246949722 | no |
| Ovca2         | -0.462464798 | -1.377893895 | 0.024718715 | 0.377215272 | 1.298832394 | 0.060045936 | no |
| Snrnp48       | -0.460171847 | -1.375705676 | 0.029287564 | 0.306404796 | 1.236622188 | 0.130805637 | no |
| Fbxo32        | -0.45823554  | -1.373860517 | 0.018039647 | 0.213801944 | 1.159740432 | 0.237084233 | no |
| Gm8234        | -0.45707467  | -1.372755479 | 0.049536504 | 0.317831986 | 1.246456026 | 0.159252785 | no |
| Cep95         | -0.454419757 | -1.370231595 | 0.024893015 | 0.319851888 | 1.248202398 | 0.100976152 | no |
| Adam19        | -0.451760467 | -1.367708202 | 0.005827501 | 0.268591287 | 1.204630997 | 0.076505185 | no |
| Trpm3         | -0.448572295 | -1.364689078 | 0.028452191 | 0.313782698 | 1.242962437 | 0.109779639 | no |
| Rasgrp3       | -0.448257532 | -1.364391367 | 0.034512858 | 0.228491811 | 1.171609512 | 0.25553642  | no |
| Slfn5         | -0.447778039 | -1.363937975 | 0.02429174  | 0.307565883 | 1.237617827 | 0.107213735 | no |
| D930015E06Rik | -0.445503744 | -1.361789528 | 0.010537125 | 0.202243564 | 1.150486108 | 0.208081964 | no |
| Robo4         | -0.443224204 | -1.359639522 | 0.037303206 | 0.270939751 | 1.206593529 | 0.184500225 | no |
| Lsm11         | -0.442514756 | -1.358971081 | 0.009246422 | 0.269509908 | 1.205398278 | 0.088325686 | no |
| Fmnl1         | -0.432218014 | -1.34930642  | 0.006043282 | 0.228685301 | 1.171766655 | 0.109843129 | no |
| Zswim6        | -0.429098009 | -1.346391533 | 0.020406205 | 0.207906516 | 1.155010939 | 0.227556716 | no |
| Gmip          | -0.427672334 | -1.345061682 | 0.018608852 | 0.176497973 | 1.130137235 | 0.296623729 | no |
| Scrt2         | -0.4264494   | -1.343921992 | 0.027287818 | 0.186999245 | 1.138393433 | 0.303315197 | no |
| Per2          | -0.425678206 | -1.34320379  | 0.008319344 | 0.198509707 | 1.147512371 | 0.176844614 | no |
| Mtm1          | -0.425280414 | -1.342833481 | 0.047142067 | 0.246223567 | 1.186098288 | 0.231465695 | no |
| Pde7b         | -0.425230662 | -1.342787174 | 0.027325773 | 0.367738972 | 1.290329009 | 0.051687365 | no |
| Plekha2       | -0.423841824 | -1.341495136 | 0.009787461 | 0.216983099 | 1.162300491 | 0.153672307 | no |
| Cntn2         | -0.419626977 | -1.337581666 | 0.008738805 | 0.223873422 | 1.167864925 | 0.126759707 | no |
| Sfi1          | -0.418512016 | -1.336548339 | 0.032450608 | 0.13480359  | 1.097943328 | 0.45571248  | no |
| Fmn1          | -0.418391564 | -1.336436754 | 0.04419802  | 0.066702172 | 1.047319897 | 0.730451476 | no |

|               |              |              |             |             |             |             |    |
|---------------|--------------|--------------|-------------|-------------|-------------|-------------|----|
| Ccdc134       | -0.415562024 | -1.333818185 | 0.041504212 | 0.104405567 | 1.075051346 | 0.585901119 | no |
| Steap2        | -0.413238888 | -1.3316721   | 0.019682673 | 0.171811077 | 1.126471706 | 0.298089747 | no |
| Gm11549       | -0.412866455 | -1.331328371 | 0.022690073 | 0.178292613 | 1.131543944 | 0.288104339 | no |
| Pisd-ps2      | -0.411678089 | -1.330232191 | 0.020885835 | 0.102371738 | 1.073536868 | 0.531334902 | no |
| lqck          | -0.411230755 | -1.329819793 | 0.028081395 | 0.299979642 | 1.231127041 | 0.097170551 | no |
| Cfap69        | -0.409918275 | -1.32861055  | 0.007742406 | 0.237299333 | 1.178783959 | 0.097730213 | no |
| Hspa5         | -0.402897728 | -1.322160874 | 0.006596357 | 0.244833726 | 1.184956194 | 0.074018843 | no |
| Htr7          | -0.40125434  | -1.320655645 | 0.029014205 | 0.351311869 | 1.275720135 | 0.052040828 | no |
| Fat1          | -0.401194045 | -1.320600452 | 0.029435205 | 0.299014502 | 1.230303712 | 0.091388398 | no |
| 3300002P13Rik | -0.399434475 | -1.318990776 | 0.044676475 | 0.218266548 | 1.163334956 | 0.249318673 | no |
| Kdm7a         | -0.396334885 | -1.316160003 | 0.026398669 | 0.144444195 | 1.105304747 | 0.378353318 | no |
| lqcg          | -0.39303162  | -1.313149906 | 0.046468603 | 0.308895538 | 1.238758999 | 0.109198242 | no |
| Apln          | -0.392348856 | -1.312528597 | 0.013684515 | 0.272247985 | 1.207688163 | 0.072369959 | no |
| Kmt2a         | -0.391805953 | -1.31203477  | 0.014623877 | 0.198171287 | 1.147243225 | 0.179152383 | no |
| Runx2         | -0.391573829 | -1.311823686 | 0.01955424  | 0.140597618 | 1.10236166  | 0.366247941 | no |
| Spred1        | -0.391257327 | -1.311535926 | 0.00704886  | 0.221726149 | 1.166127995 | 0.096626699 | no |
| Ago3          | -0.389601804 | -1.310031775 | 0.020653648 | 0.250783518 | 1.189853141 | 0.117482529 | no |
| Ccdc117       | -0.38892196  | -1.309414591 | 0.031859963 | 0.166428298 | 1.122276605 | 0.328257592 | no |
| Mdn1          | -0.386309743 | -1.307045843 | 0.022059608 | 0.217941401 | 1.163072799 | 0.167155229 | no |
| Myh9          | -0.384446309 | -1.305358708 | 0.003635753 | 0.193966243 | 1.143904207 | 0.104648812 | no |
| Star          | -0.382792786 | -1.303863448 | 0.049777807 | 0.293504044 | 1.225613458 | 0.123427942 | no |
| Pop1          | -0.38265986  | -1.303743319 | 0.043884972 | 0.327074582 | 1.254467054 | 0.080024563 | no |
| Kdr           | -0.382527163 | -1.303623408 | 0.021264747 | 0.227595296 | 1.17088168  | 0.148742166 | no |
| Irs2          | -0.379863288 | -1.301218544 | 0.010211112 | 0.270808231 | 1.206483538 | 0.054387849 | no |
| Mir124a-1hg   | -0.378747022 | -1.300212133 | 0.03113707  | 0.104030412 | 1.074771829 | 0.515772332 | no |
| Ccdc88c       | -0.378710219 | -1.300178965 | 0.008083811 | 0.191741263 | 1.142141394 | 0.146182418 | no |
| Trip11        | -0.378617074 | -1.300095025 | 0.013427853 | 0.232416618 | 1.174801179 | 0.10766699  | no |
| Rnft1         | -0.373901945 | -1.295852888 | 0.02013993  | 0.249406043 | 1.18871762  | 0.104888611 | no |
| Cdr2          | -0.373700538 | -1.295671994 | 0.013051031 | 0.221576533 | 1.166007067 | 0.117809774 | no |
| Nipbl         | -0.373228107 | -1.295247776 | 0.034985409 | 0.266533138 | 1.202913695 | 0.117035029 | no |
| Igf1r         | -0.370966828 | -1.293219197 | 0.028587988 | 0.21187881  | 1.158195511 | 0.184173613 | no |
| Mxd3          | -0.369103561 | -1.291550058 | 0.029634277 | 0.213185561 | 1.159245046 | 0.187340592 | no |
| Nav2          | -0.367958916 | -1.290525739 | 0.005777077 | 0.167990053 | 1.123492157 | 0.165528188 | no |
| Etv4          | -0.367582167 | -1.290188772 | 0.023354342 | 0.208457048 | 1.155451776 | 0.174883723 | no |
| Zfp141        | -0.365932272 | -1.28871413  | 0.045042661 | 0.188612158 | 1.139666853 | 0.279371235 | no |
| Clgn          | -0.365552112 | -1.28837459  | 0.040597044 | 0.258301087 | 1.196069388 | 0.135304033 | no |
| Chuk          | -0.365225552 | -1.288082994 | 0.025729946 | 0.121934135 | 1.08819276  | 0.421561031 | no |
| Maml3         | -0.36306015  | -1.286151105 | 0.041135571 | 0.205196892 | 1.152843671 | 0.227884035 | no |
| Bcor          | -0.361667884 | -1.28491051  | 0.012439271 | 0.153152529 | 1.111996718 | 0.251050761 | no |



|         |              |              |             |             |             |             |    |
|---------|--------------|--------------|-------------|-------------|-------------|-------------|----|
| Fam53b  | -0.360877829 | -1.284207054 | 0.023314407 | 0.088772026 | 1.063464612 | 0.544050693 | no |
| Egln3   | -0.360768035 | -1.284109326 | 0.042695638 | 0.149987896 | 1.109560163 | 0.374183139 | no |
| Lyst    | -0.359671958 | -1.283134104 | 0.008481039 | 0.237499859 | 1.178947814 | 0.065019696 | no |
| Kmt2c   | -0.359620193 | -1.283088065 | 0.01899435  | 0.172304786 | 1.126857265 | 0.225318626 | no |
| Pecam1  | -0.356656744 | -1.28045517  | 0.009647174 | 0.255568977 | 1.193806469 | 0.051665762 | no |
| P4ha1   | -0.355534978 | -1.27945994  | 0.046157548 | 0.083569709 | 1.059636694 | 0.612612353 | no |
| Zfp397  | -0.355385584 | -1.279327457 | 0.031613663 | 0.154226826 | 1.11282507  | 0.319256106 | no |
| Ccdc141 | -0.354322484 | -1.278385088 | 0.036907666 | 0.084157064 | 1.060068185 | 0.596728954 | no |
| Eml5    | -0.352449783 | -1.276726746 | 0.007783031 | 0.155375473 | 1.113711433 | 0.197863041 | no |
| Nme7    | -0.352067261 | -1.276388275 | 0.035773952 | 0.206464045 | 1.153856685 | 0.192756698 | no |
| Dusp4   | -0.352029341 | -1.276354727 | 0.033669544 | 0.179859526 | 1.132773582 | 0.253136695 | no |
| Lrrk2   | -0.351729497 | -1.276089482 | 0.022443757 | 0.177732254 | 1.131104525 | 0.217156391 | no |
| Raver2  | -0.349836541 | -1.274416226 | 0.029097363 | 0.166725734 | 1.122508006 | 0.270776986 | no |
| Chfr    | -0.348185554 | -1.272958648 | 0.011800234 | 0.159816631 | 1.117145138 | 0.211500137 | no |
| Hipk3   | -0.343689056 | -1.26899735  | 0.015893774 | 0.243697355 | 1.184023204 | 0.072939791 | no |
| Sos1    | -0.343652328 | -1.268965044 | 0.01338424  | 0.167918873 | 1.123436727 | 0.192674646 | no |
| Trim59  | -0.342611263 | -1.268049675 | 0.047341745 | 0.232541944 | 1.174903237 | 0.164461438 | no |
| Nktr    | -0.341441093 | -1.267021576 | 0.021868194 | 0.158827883 | 1.116379768 | 0.250823831 | no |
| Sbk1    | -0.339970526 | -1.265730735 | 0.003781226 | 0.147928484 | 1.107977423 | 0.161277533 | no |
| Zfp937  | -0.339665478 | -1.265463133 | 0.029554594 | 0.243787948 | 1.184097557 | 0.105973866 | no |
| Lamc2   | -0.339324287 | -1.265163892 | 0.049457077 | 0.215771081 | 1.161324445 | 0.195659716 | no |
| Ptchd2  | -0.337533534 | -1.263594475 | 0.008616637 | 0.230582248 | 1.173308382 | 0.05806541  | no |
| Mast4   | -0.337068413 | -1.263187161 | 0.025048634 | 0.129922564 | 1.094234967 | 0.352726633 | no |
| Lipa    | -0.336527163 | -1.262713345 | 0.02196005  | 0.269698119 | 1.205555542 | 0.059098633 | no |
| Fam166a | -0.336352597 | -1.262560566 | 0.017442881 | 0.217315082 | 1.162567983 | 0.106488978 | no |
| Sirt1   | -0.334590785 | -1.261019675 | 0.039371522 | 0.274837053 | 1.209857433 | 0.08410515  | no |
| Slc4a7  | -0.334005729 | -1.260508397 | 0.038785121 | 0.156930193 | 1.114912271 | 0.305333225 | no |
| Arl15   | -0.332792275 | -1.259448626 | 0.003766414 | 0.186275846 | 1.137822761 | 0.076825324 | no |
| Numb    | -0.332733222 | -1.259397075 | 0.006063197 | 0.178842187 | 1.131975071 | 0.109419797 | no |
| Pcgf6   | -0.332633117 | -1.259309692 | 0.047836178 | 0.204105313 | 1.15197173  | 0.207468316 | no |
| Jak2    | -0.331543858 | -1.25835925  | 0.01010447  | 0.209859499 | 1.156575542 | 0.08394071  | no |
| Chd9    | -0.331284948 | -1.258133442 | 0.005200408 | 0.191394823 | 1.141867159 | 0.080733037 | no |
| Zc3h11a | -0.328784597 | -1.255954845 | 0.016268127 | 0.171902736 | 1.126543276 | 0.177785669 | no |
| Gatm    | -0.328723365 | -1.25590154  | 0.040884821 | 0.197246457 | 1.146508028 | 0.198220687 | no |
| Sgsm1   | -0.328686555 | -1.255869497 | 0.013646842 | 0.181372562 | 1.13396221  | 0.144322494 | no |
| Vamp1   | -0.327923665 | -1.255205574 | 0.012736802 | 0.181197878 | 1.133824916 | 0.140264357 | no |
| Otub2   | -0.327694438 | -1.255006154 | 0.014552209 | 0.193151746 | 1.14325858  | 0.126333587 | no |
| Slco1c1 | -0.327513733 | -1.254848967 | 0.018843688 | 0.252728758 | 1.191458547 | 0.060574465 | no |
| Rps6ka3 | -0.32541973  | -1.253028936 | 0.00300388  | 0.182355575 | 1.134735124 | 0.068514345 | no |

|               |              |              |             |             |             |             |    |
|---------------|--------------|--------------|-------------|-------------|-------------|-------------|----|
| Ascc2         | -0.324645578 | -1.252356739 | 0.049033279 | 0.15510618  | 1.113503567 | 0.324503022 | no |
| Abca7         | -0.32375286  | -1.251582039 | 0.004970194 | 0.163081937 | 1.119676478 | 0.121396254 | no |
| Sipa1l3       | -0.323041221 | -1.250964822 | 0.01774172  | 0.216413248 | 1.161841484 | 0.09561693  | no |
| Zmynd8        | -0.320502772 | -1.248765662 | 0.00517239  | 0.112739593 | 1.081279575 | 0.273025009 | no |
| Jade2         | -0.31939881  | -1.247810461 | 0.010346773 | 0.128219389 | 1.092943929 | 0.26104958  | no |
| Bdp1          | -0.318924855 | -1.247400597 | 0.013880995 | 0.186456508 | 1.137965254 | 0.126409516 | no |
| Map3k2        | -0.3182591   | -1.246825097 | 0.044764575 | 0.200518932 | 1.149111612 | 0.188302433 | no |
| Zc3h3         | -0.318251053 | -1.246818142 | 0.017555274 | 0.175239642 | 1.129151949 | 0.164825834 | no |
| Cdk13         | -0.317813002 | -1.246439624 | 0.011812711 | 0.170091701 | 1.125129998 | 0.14863614  | no |
| Epb4.1        | -0.317750647 | -1.246385753 | 0.030223943 | 0.095935151 | 1.068757949 | 0.483883557 | no |
| Zfhx2         | -0.317717493 | -1.24635711  | 0.012392247 | 0.150320057 | 1.109815653 | 0.201572809 | no |
| Dnajc3        | -0.317183586 | -1.245895949 | 0.027664531 | 0.176589327 | 1.1302088   | 0.194839317 | no |
| Ccnd1         | -0.316469883 | -1.245279755 | 0.009228839 | 0.21969591  | 1.16448811  | 0.056935179 | no |
| Slc7a6        | -0.315504194 | -1.244446487 | 0.014422042 | 0.202572348 | 1.150748329 | 0.097643157 | no |
| Tet3          | -0.315396857 | -1.244353903 | 0.038247917 | 0.056266803 | 1.039771706 | 0.68977018  | no |
| Stard8        | -0.314992254 | -1.244004974 | 0.024300026 | 0.227357493 | 1.170688697 | 0.091644397 | no |
| Gpr17         | -0.314575405 | -1.243645586 | 0.039632212 | 0.210189917 | 1.15684046  | 0.152008508 | no |
| Ssh2          | -0.314443238 | -1.243531659 | 0.02423383  | 0.213097101 | 1.159173968 | 0.110799309 | no |
| Utrn          | -0.314352869 | -1.243453769 | 0.010341508 | 0.220529917 | 1.165161484 | 0.058607782 | no |
| Mcf2l         | -0.313773212 | -1.242954264 | 0.017549388 | 0.18998554  | 1.140752282 | 0.127205676 | no |
| Kcnj10        | -0.313107233 | -1.242380622 | 0.024821234 | 0.262563849 | 1.199608666 | 0.053777447 | no |
| Bmp2k         | -0.312628022 | -1.241968017 | 0.039593709 | 0.19251811  | 1.142756567 | 0.187049842 | no |
| Myo9b         | -0.31222846  | -1.241624095 | 0.025491819 | 0.160446517 | 1.117632994 | 0.222691117 | no |
| Zfp462        | -0.312027316 | -1.241450997 | 0.019154537 | 0.182632837 | 1.134953222 | 0.147236857 | no |
| Krit1         | -0.311806757 | -1.241261219 | 0.022053429 | 0.13468788  | 1.097855273 | 0.28963659  | no |
| Col4a1        | -0.311161291 | -1.240705999 | 0.044998376 | 0.10777613  | 1.077565921 | 0.459839442 | no |
| Vwa1          | -0.310978027 | -1.240548404 | 0.02131665  | 0.203252003 | 1.151290576 | 0.115155226 | no |
| Slc24a5       | -0.309824035 | -1.239556502 | 0.040486031 | 0.055038356 | 1.038886723 | 0.697649688 | no |
| Kcna1         | -0.309671619 | -1.239425555 | 0.008138963 | 0.13745276  | 1.099961295 | 0.199391956 | no |
| Vcam1         | -0.309585413 | -1.239351497 | 0.047992802 | 0.265146003 | 1.201757663 | 0.085158393 | no |
| Sfpq          | -0.309376841 | -1.239172335 | 0.01283162  | 0.159255767 | 1.11671092  | 0.16805359  | no |
| Plcx2         | -0.308741473 | -1.23862672  | 0.049815119 | 0.140167436 | 1.102033008 | 0.345317739 | no |
| Pde7a         | -0.308277525 | -1.23822846  | 0.011602581 | 0.178807541 | 1.131947887 | 0.118457613 | no |
| Zbtb44        | -0.307553182 | -1.237606931 | 0.047025244 | 0.261836992 | 1.199004432 | 0.085591586 | no |
| Rnf165        | -0.307284394 | -1.237376374 | 0.009313379 | 0.160284832 | 1.117507746 | 0.1434772   | no |
| D930016D06Rik | -0.306666144 | -1.236846225 | 0.043539052 | 0.192405475 | 1.142667353 | 0.188437411 | no |
| Usp35         | -0.305969135 | -1.236248813 | 0.014432184 | 0.168512021 | 1.12389871  | 0.150931276 | no |
| Grin2c        | -0.305739417 | -1.236051982 | 0.026151417 | 0.187012313 | 1.138403745 | 0.152907884 | no |
| Ikzf5         | -0.305281802 | -1.235659975 | 0.023603161 | 0.148521891 | 1.108433248 | 0.241929834 | no |

|               |              |              |             |             |             |             |    |
|---------------|--------------|--------------|-------------|-------------|-------------|-------------|----|
| Ppp1r3c       | -0.303516841 | -1.234149221 | 0.045552277 | 0.206089901 | 1.153557486 | 0.159463848 | no |
| Rfx7          | -0.302902349 | -1.233623667 | 0.026016389 | 0.261302189 | 1.198560047 | 0.050405465 | no |
| Gm17066       | -0.302799552 | -1.233535771 | 0.042444385 | 0.150376545 | 1.109859109 | 0.29014636  | no |
| Itpr1         | -0.302604024 | -1.233368601 | 0.007639801 | 0.1836192   | 1.135729449 | 0.083242677 | no |
| Slco2b1       | -0.302525274 | -1.233301279 | 0.021370385 | 0.219564044 | 1.164381678 | 0.082939286 | no |
| Mapk11        | -0.302286966 | -1.233097576 | 0.007057894 | 0.135697832 | 1.09862409  | 0.185661292 | no |
| Wipf3         | -0.301839833 | -1.232715463 | 0.017840882 | 0.20285808  | 1.150976263 | 0.094733143 | no |
| Coro6         | -0.301615728 | -1.23252399  | 0.039191564 | 0.078190152 | 1.055692853 | 0.569134407 | no |
| Tacc1         | -0.300894578 | -1.231908051 | 0.00412747  | 0.172397231 | 1.126929474 | 0.074041867 | no |
| Lingo3        | -0.299995541 | -1.231140608 | 0.018898574 | 0.195384824 | 1.145029545 | 0.108725009 | no |
| Glcci1        | -0.299152359 | -1.230421279 | 0.014410809 | 0.114272373 | 1.082428982 | 0.311070175 | no |
| Fam126b       | -0.29881915  | -1.23013713  | 0.025974516 | 0.14666977  | 1.107011163 | 0.244063062 | no |
| Rgs5          | -0.298502248 | -1.229866948 | 0.016135734 | 0.137309534 | 1.0998521   | 0.234774058 | no |
| Hook3         | -0.297282048 | -1.228827193 | 0.036849518 | 0.191816869 | 1.14220125  | 0.159416387 | no |
| Sfswap        | -0.296926868 | -1.228524703 | 0.014881912 | 0.1736009   | 1.127870086 | 0.130770988 | no |
| Sik2          | -0.296082028 | -1.227805491 | 0.032076134 | 0.11104634  | 1.08001125  | 0.392307786 | no |
| Vegfa         | -0.295321563 | -1.227158469 | 0.01581272  | 0.152653505 | 1.111612148 | 0.182369371 | no |
| Suclg2        | -0.294223259 | -1.226224605 | 0.04395959  | 0.273921213 | 1.209089644 | 0.05871486  | no |
| Dnaja4        | -0.29385071  | -1.225907997 | 0.019143433 | 0.108771728 | 1.078309801 | 0.349895559 | no |
| Wee1          | -0.293155722 | -1.225317583 | 0.03056573  | 0.19140968  | 1.141878919 | 0.141347997 | no |
| Dimt1         | -0.293140562 | -1.225304708 | 0.037399799 | 0.12915791  | 1.093655157 | 0.332797196 | no |
| Dnaja1        | -0.292641276 | -1.224880729 | 0.011865206 | 0.142052159 | 1.103473634 | 0.18802979  | no |
| Akap17b       | -0.292041301 | -1.224371443 | 0.038172401 | 0.187672943 | 1.138925155 | 0.16623749  | no |
| Golm1         | -0.291645987 | -1.224035998 | 0.016980616 | 0.206558079 | 1.153931895 | 0.077767122 | no |
| Fstl4         | -0.291012881 | -1.223498965 | 0.047279252 | 0.213568193 | 1.159552541 | 0.134573897 | no |
| Osbpl6        | -0.290234644 | -1.222839148 | 0.012075638 | 0.119302456 | 1.086209552 | 0.262740687 | no |
| Ahsa2         | -0.289986845 | -1.222629129 | 0.016137149 | 0.168233718 | 1.123681926 | 0.138861258 | no |
| Apbb2         | -0.289017817 | -1.221808191 | 0.022689568 | 0.165327431 | 1.121420564 | 0.169082967 | no |
| Ndufaf4       | -0.288876222 | -1.22168828  | 0.033022523 | 0.157574742 | 1.115410489 | 0.221868529 | no |
| Xbp1          | -0.288854411 | -1.221669811 | 0.00632261  | 0.167502475 | 1.123112522 | 0.087902327 | no |
| Srrm2         | -0.288604302 | -1.221458038 | 0.01027349  | 0.189870755 | 1.140661524 | 0.074179964 | no |
| Daam2         | -0.287367986 | -1.22041176  | 0.04634826  | 0.230847086 | 1.173523788 | 0.101341158 | no |
| Ipmk          | -0.286612476 | -1.219772822 | 0.007380409 | 0.176860359 | 1.130421146 | 0.077150067 | no |
| Akap13        | -0.286389208 | -1.219584068 | 0.03107377  | 0.136387157 | 1.099149142 | 0.276611244 | no |
| F420014N23Rik | -0.286031762 | -1.219281937 | 0.046293702 | 0.16468778  | 1.120923468 | 0.231993049 | no |
| Slc25a42      | -0.285747804 | -1.219041976 | 0.029690536 | 0.154016449 | 1.112662807 | 0.21714714  | no |
| Tra2a         | -0.285627105 | -1.218939992 | 0.046166866 | 0.159886547 | 1.117199278 | 0.242379047 | no |
| Ltbp3         | -0.285476818 | -1.218813021 | 0.027274692 | 0.207452179 | 1.154647258 | 0.096833858 | no |
| Med12l        | -0.285212183 | -1.218589473 | 0.034866784 | 0.223576491 | 1.167624584 | 0.089551356 | no |

|               |              |              |             |             |             |             |    |
|---------------|--------------|--------------|-------------|-------------|-------------|-------------|----|
| Mat2a         | -0.284344091 | -1.217856449 | 0.017075778 | 0.098833131 | 1.07090695  | 0.368442107 | no |
| Cntnap1       | -0.284292847 | -1.217813193 | 0.009497783 | 0.16097472  | 1.11804226  | 0.115377991 | no |
| Ick           | -0.283401836 | -1.217061302 | 0.02221283  | 0.232634652 | 1.174978739 | 0.054287068 | no |
| Eif5a2        | -0.28223429  | -1.216076755 | 0.037490259 | 0.105664262 | 1.075989696 | 0.407592639 | no |
| Atp2b2        | -0.281902962 | -1.215797504 | 0.013691591 | 0.168910966 | 1.124209543 | 0.116936151 | no |
| Efcab14       | -0.281471931 | -1.215434317 | 0.031609132 | 0.208329731 | 1.155349812 | 0.100663402 | no |
| Ralgps2       | -0.28102771  | -1.21506013  | 0.025567429 | 0.173335752 | 1.127662818 | 0.148881271 | no |
| Syne1         | -0.280852672 | -1.214912719 | 0.00821196  | 0.164714448 | 1.120944188 | 0.096575664 | no |
| Ptpn1         | -0.280499631 | -1.214615454 | 0.006740767 | 0.173443945 | 1.127747389 | 0.072923204 | no |
| Dpf2          | -0.280062954 | -1.214247869 | 0.013493603 | 0.133919105 | 1.09727041  | 0.203787821 | no |
| Tnks          | -0.279424087 | -1.213710284 | 0.009996784 | 0.163011035 | 1.119621453 | 0.108257169 | no |
| Rgs20         | -0.279106832 | -1.213443413 | 0.014472544 | 0.210512456 | 1.157099121 | 0.055406565 | no |
| Setd8         | -0.278407535 | -1.21285538  | 0.019728335 | 0.141617114 | 1.103140932 | 0.206871353 | no |
| 9330159F19Rik | -0.277159848 | -1.211806919 | 0.033756964 | 0.173510653 | 1.127799535 | 0.164734663 | no |
| Sorl1         | -0.276953851 | -1.211633902 | 0.043954523 | 0.143739515 | 1.104764997 | 0.270753931 | no |
| Asap2         | -0.276931443 | -1.211615083 | 0.026623569 | 0.216246741 | 1.1617074   | 0.074743208 | no |
| Ptpn3         | -0.276692652 | -1.211414556 | 0.026452132 | 0.144978335 | 1.105714049 | 0.218782526 | no |
| Fkbp5         | -0.276231772 | -1.211027622 | 0.036220386 | 0.157134879 | 1.115070463 | 0.212355355 | no |
| Rbm12         | -0.27605884  | -1.210882468 | 0.048479024 | 0.14781454  | 1.107889918 | 0.270052064 | no |
| Dmx1          | -0.275651045 | -1.210540247 | 0.027458621 | 0.137493244 | 1.099992162 | 0.243923644 | no |
| Csmd2         | -0.275086092 | -1.210066297 | 0.021119261 | 0.122284119 | 1.088456777 | 0.272759226 | no |
| Stim2         | -0.274029346 | -1.209180271 | 0.0447101   | 0.111210051 | 1.080133812 | 0.388838877 | no |
| Adgrf5        | -0.271943864 | -1.207433609 | 0.040969896 | 0.196296337 | 1.145753217 | 0.128387513 | no |
| Dcp1a         | -0.271673497 | -1.207207352 | 0.035712944 | 0.143571625 | 1.10463644  | 0.243676884 | no |
| Phrf1         | -0.270876598 | -1.206540713 | 0.017129424 | 0.171267643 | 1.126047467 | 0.112483709 | no |
| Uggt1         | -0.270640525 | -1.206343298 | 0.023763682 | 0.157464567 | 1.115325311 | 0.165807974 | no |
| Bcl11b        | -0.270416802 | -1.206156242 | 0.024979555 | 0.045196355 | 1.031823604 | 0.685243095 | no |
| Ccdc88a       | -0.270230423 | -1.206000431 | 0.037541437 | 0.187443268 | 1.138743855 | 0.134967746 | no |
| Elac2         | -0.270097771 | -1.205889548 | 0.017936559 | 0.2099448   | 1.156643927 | 0.05733053  | no |
| Lynx1         | -0.269247936 | -1.205179415 | 0.047505264 | 0.123482027 | 1.089360927 | 0.33716606  | no |
| Srrm1         | -0.269054845 | -1.205018124 | 0.010301243 | 0.168660012 | 1.124014005 | 0.087641815 | no |
| Bmi1          | -0.268380849 | -1.204455297 | 0.008989875 | 0.174463684 | 1.128544795 | 0.071650578 | no |
| 2700029M09Rik | -0.265915132 | -1.202398515 | 0.020043508 | 0.141734966 | 1.10323105  | 0.188260054 | no |
| Mfhas1        | -0.265815503 | -1.202315483 | 0.021443575 | 0.150756746 | 1.110151634 | 0.168111176 | no |
| Adgra2        | -0.265533863 | -1.202080792 | 0.047147    | 0.135935946 | 1.098805431 | 0.287737296 | no |
| Pde4a         | -0.265495701 | -1.202048995 | 0.005209986 | 0.144063579 | 1.105013181 | 0.099217117 | no |
| Sox5          | -0.265455206 | -1.202015255 | 0.024488479 | 0.165092955 | 1.121238319 | 0.142487992 | no |
| Zfp385b       | -0.265337215 | -1.201916952 | 0.039765931 | 0.147812686 | 1.107888494 | 0.23085925  | no |
| Ttbk2         | -0.265045663 | -1.201674083 | 0.013702431 | 0.181229662 | 1.133849895 | 0.076911556 | no |

|         |              |              |             |             |             |             |    |
|---------|--------------|--------------|-------------|-------------|-------------|-------------|----|
| Abi3    | -0.265044939 | -1.20167348  | 0.031149606 | 0.132772682 | 1.096398821 | 0.254495074 | no |
| Plekha3 | -0.264943971 | -1.201589383 | 0.011271291 | 0.126577333 | 1.091700663 | 0.191070693 | no |
| Trove2  | -0.264814073 | -1.201481199 | 0.038886858 | 0.144777333 | 1.105560007 | 0.236317546 | no |
| Fubp1   | -0.263875541 | -1.20069984  | 0.024517595 | 0.104828759 | 1.075366742 | 0.338968551 | no |
| Kcnab3  | -0.263840631 | -1.200670787 | 0.031189812 | 0.161318409 | 1.11830864  | 0.168435553 | no |
| Ubr2    | -0.263430508 | -1.200329514 | 0.012723652 | 0.145312624 | 1.105970285 | 0.142029414 | no |
| Ccdc6   | -0.263346555 | -1.200259667 | 0.034817855 | 0.086127444 | 1.061516976 | 0.462330105 | no |
| Ints10  | -0.26319886  | -1.200136797 | 0.013379165 | 0.163637845 | 1.120108002 | 0.103600698 | no |

**Suppl. Table 3 List of genes up-regulated in *Shank3*-deficient mice and recovered by UNC0642 treatment [Het+SAL\_vs\_WT (fold change > 1.2 & P < 0.05) and Het+UNC\_vs\_Het+SAL (fold change < -1.1 & P < 0.05)]**

| Gene Symbol   | logFC (SAL_vs_WT) | Fold change (SAL_vs_WT) | P.Value (SAL_vs_WT) | logFC (UNC_vs_SAL) | Fold change (UNC_vs_SAL) | P.Value (UNC_vs_SAL) | Restored |
|---------------|-------------------|-------------------------|---------------------|--------------------|--------------------------|----------------------|----------|
| Fdft1         | 0.267010659       | 1.203311916             | 0.008881474         | -0.191759397       | -1.14215575              | 0.048486125          | yes      |
| Ric8          | 0.270509286       | 1.206233565             | 0.010698844         | -0.209983886       | -1.156675264             | 0.039648919          | yes      |
| Phf13         | 0.271448635       | 1.207019208             | 0.024602701         | -0.234637686       | -1.17661121              | 0.04779191           | yes      |
| Wdr19         | 0.279204938       | 1.213525932             | 0.026421647         | -0.28102471        | -1.215057603             | 0.025589026          | yes      |
| Gpr89         | 0.286172119       | 1.219400565             | 0.032662567         | -0.26733761        | -1.203584648             | 0.044174366          | yes      |
| Ppapdc1b      | 0.289644249       | 1.222338826             | 0.015051431         | -0.256841696       | -1.194860088             | 0.028160289          | yes      |
| Fbxw9         | 0.289709977       | 1.222394516             | 0.018918709         | -0.257327159       | -1.195262223             | 0.034015154          | yes      |
| 2610001J05Rik | 0.292826824       | 1.225038274             | 0.010456966         | -0.238129451       | -1.179462419             | 0.031571044          | yes      |
| Arl4a         | 0.310871463       | 1.240456774             | 0.005817242         | -0.210903901       | -1.157413118             | 0.0468222            | yes      |
| Dusp1         | 0.311729219       | 1.241194509             | 0.004799451         | -0.236531488       | -1.178156742             | 0.024684072          | yes      |
| Elp6          | 0.313547912       | 1.242760172             | 0.03437204          | -0.289450183       | -1.222174413             | 0.04862005           | yes      |
| Slc35f5       | 0.314281822       | 1.243392535             | 0.014110315         | -0.257376372       | -1.195302996             | 0.038577174          | yes      |
| Cd200         | 0.315194319       | 1.244179223             | 0.004222974         | -0.236694271       | -1.178289684             | 0.023720793          | yes      |
| Usp16         | 0.316310618       | 1.245142291             | 0.036739738         | -0.325825336       | -1.253381267             | 0.032123207          | yes      |
| Ntng1         | 0.318867098       | 1.24735066              | 0.044813032         | -0.361302955       | -1.284585534             | 0.025270739          | yes      |
| Leprot        | 0.319203409       | 1.247641467             | 0.00731817          | -0.239988687       | -1.180983401             | 0.034841665          | yes      |
| Dpysl5        | 0.32220963        | 1.250243955             | 0.007325461         | -0.22695725        | -1.17036396              | 0.046332261          | yes      |
| Fra10ac1      | 0.325138553       | 1.252784747             | 0.025838075         | -0.326479874       | -1.253950044             | 0.025316876          | yes      |
| Ddx3y         | 0.325603989       | 1.253188981             | 0.003845087         | -0.243259517       | -1.183663924             | 0.02277246           | yes      |
| Txn1          | 0.32616835        | 1.253679306             | 0.004057415         | -0.245470813       | -1.18547958              | 0.02279755           | yes      |
| Ndn           | 0.330624773       | 1.257557854             | 0.003166093         | -0.230550943       | -1.173282922             | 0.028080355          | yes      |
| Bbs9          | 0.33704102        | 1.263163177             | 0.020381765         | -0.280507995       | -1.214622496             | 0.04800753           | yes      |
| Atraid        | 0.340229177       | 1.26595768              | 0.002413122         | -0.205959348       | -1.153453103             | 0.045161148          | yes      |
| Taf6l         | 0.340403676       | 1.266110811             | 0.027967728         | -0.30787163        | -1.23788014              | 0.044098628          | yes      |
| Wbp5          | 0.341109449       | 1.26673035              | 0.003142542         | -0.223571298       | -1.167620381             | 0.03726941           | yes      |
| Gap43         | 0.344691204       | 1.269879148             | 0.005091387         | -0.243929663       | -1.184213875             | 0.035504084          | yes      |
| Cep83os       | 0.350514036       | 1.275014838             | 0.004518219         | -0.269281261       | -1.205207254             | 0.022184788          | yes      |
| Noa1          | 0.353128316       | 1.277327362             | 0.012013202         | -0.300108492       | -1.231237                | 0.028603789          | yes      |
| Mrpl57        | 0.358880962       | 1.282430784             | 0.008673912         | -0.268340999       | -1.204422028             | 0.040221862          | yes      |
| Celf6         | 0.360576289       | 1.283938669             | 0.003825584         | -0.256550431       | -1.194618883             | 0.028888868          | yes      |
| Coa7          | 0.367250392       | 1.289892103             | 0.010489452         | -0.352792007       | -1.277029637             | 0.013294191          | yes      |
| Izumo4        | 0.383402613       | 1.304414708             | 0.005250518         | -0.33983965        | -1.265615918             | 0.01133896           | yes      |
| Fxyd6         | 0.38569266        | 1.306486901             | 0.003898136         | -0.245336343       | -1.18536909              | 0.047160206          | yes      |
| Bmp3          | 0.38640318        | 1.307130498             | 0.002413442         | -0.236943117       | -1.178492941             | 0.042761392          | yes      |
| Gm10677       | 0.391481951       | 1.311740145             | 0.00487362          | -0.267747009       | -1.203926242             | 0.040502107          | yes      |
| Xrcc6         | 0.397519114       | 1.31724081              | 0.02125123          | -0.403865124       | -1.323047744             | 0.019560173          | yes      |

|               |             |             |             |              |              |             |     |
|---------------|-------------|-------------|-------------|--------------|--------------|-------------|-----|
| Pstpip2       | 0.398141315 | 1.317809027 | 0.023729177 | -0.343566452 | -1.268889512 | 0.046713322 | yes |
| Snrpd1        | 0.403756186 | 1.322947844 | 0.004027271 | -0.33548177  | -1.2617987   | 0.013248575 | yes |
| Btd           | 0.406328406 | 1.325308668 | 0.014528657 | -0.378843906 | -1.300299452 | 0.021231589 | yes |
| Tshz2         | 0.409130306 | 1.327885089 | 0.00179239  | -0.255253009 | -1.19354504  | 0.033426068 | yes |
| Rccd1         | 0.409454649 | 1.328183655 | 0.04010269  | -0.411328455 | -1.329909851 | 0.039308713 | yes |
| Crhbp         | 0.413666831 | 1.332067168 | 0.00105613  | -0.236707314 | -1.178300337 | 0.03692359  | yes |
| Klf5          | 0.416325613 | 1.334524335 | 0.024888494 | -0.457743671 | -1.373392196 | 0.015066119 | yes |
| Htr2c         | 0.42410697  | 1.341741706 | 0.001538124 | -0.242604331 | -1.183126496 | 0.045044214 | yes |
| Dars2         | 0.427110945 | 1.344538387 | 0.004143206 | -0.284631968 | -1.218099486 | 0.04098744  | yes |
| Glra2         | 0.429039128 | 1.346336584 | 0.007216279 | -0.352718214 | -1.276964319 | 0.02239096  | yes |
| Tusc1         | 0.432002607 | 1.349104972 | 0.038603785 | -0.471629823 | -1.386675121 | 0.025602825 | yes |
| Cdk5rap3      | 0.434315915 | 1.351269948 | 0.000952036 | -0.243940413 | -1.184222699 | 0.03799165  | yes |
| Gm9866        | 0.435625218 | 1.352496835 | 0.002372716 | -0.340735756 | -1.266402278 | 0.012416673 | yes |
| Ccdc53        | 0.439627314 | 1.356253926 | 0.021457984 | -0.373314468 | -1.295325313 | 0.046013593 | yes |
| Cntnap4       | 0.454226076 | 1.370047655 | 0.001085613 | -0.418008139 | -1.336081616 | 0.002127626 | yes |
| Nov           | 0.461867167 | 1.377323227 | 0.000634608 | -0.256347671 | -1.194451    | 0.031709315 | yes |
| Zkscan4       | 0.469553978 | 1.384681315 | 0.034570138 | -0.446557848 | -1.362784882 | 0.043148624 | yes |
| Dhrs7b        | 0.478561176 | 1.393353359 | 0.001195538 | -0.347167113 | -1.272060346 | 0.011680323 | yes |
| Cort          | 0.496265567 | 1.410557587 | 0.017580427 | -0.513830515 | -1.42783623  | 0.014500916 | yes |
| Tmem169       | 0.497638529 | 1.411900604 | 0.000669336 | -0.381016814 | -1.302259366 | 0.005402546 | yes |
| Tmem117       | 0.504953063 | 1.419077187 | 0.024583229 | -0.446456344 | -1.362689003 | 0.043437232 | yes |
| Cd24a         | 0.505623294 | 1.419736598 | 0.010650729 | -0.408848493 | -1.327625728 | 0.032878847 | yes |
| Sema3f        | 0.51354144  | 1.427550161 | 0.008797098 | -0.36746863  | -1.290087241 | 0.048909446 | yes |
| Zfand4        | 0.533092355 | 1.447027515 | 0.026404812 | -0.487377736 | -1.401894455 | 0.04001102  | yes |
| Fancl         | 0.534031978 | 1.447970267 | 0.008827883 | -0.439695268 | -1.35631781  | 0.026058462 | yes |
| AA414768      | 0.543200626 | 1.457201743 | 0.01499948  | -0.442450959 | -1.358910988 | 0.041410066 | yes |
| Bex4          | 0.556464684 | 1.470660952 | 0.00406571  | -0.393442859 | -1.313524272 | 0.030995114 | yes |
| Gprn3         | 0.558098296 | 1.472327174 | 0.017392731 | -0.483487564 | -1.398119391 | 0.035494597 | yes |
| A730017C20Rik | 0.562652661 | 1.476982427 | 0.000430213 | -0.372719165 | -1.294790931 | 0.009885694 | yes |
| Trhr          | 0.608935292 | 1.525133246 | 0.006022511 | -0.488887562 | -1.40336235  | 0.021957713 | yes |
| Epha8         | 0.616573587 | 1.533229421 | 0.011455437 | -0.459904793 | -1.375451046 | 0.04927493  | yes |
| Fam26e        | 0.625080634 | 1.542297024 | 0.008614503 | -0.486081291 | -1.40063524  | 0.033573834 | yes |
| Rwdd2b        | 0.627369612 | 1.544745973 | 0.008062908 | -0.528974167 | -1.44290285  | 0.021333643 | yes |
| Rsph9         | 0.651867298 | 1.571200504 | 0.001529282 | -0.384819001 | -1.305695966 | 0.039215544 | yes |
| Cbln1         | 0.660845538 | 1.581008953 | 0.000728386 | -0.495934282 | -1.41023372  | 0.006585966 | yes |
| Mtrf1         | 0.665212215 | 1.585801521 | 0.006881654 | -0.465987028 | -1.381262029 | 0.045536234 | yes |
| Ramp3         | 0.670362205 | 1.591472475 | 0.001240058 | -0.467759826 | -1.38296038  | 0.013963639 | yes |
| Lrrc6         | 0.671994376 | 1.593273981 | 0.002253388 | -0.501170388 | -1.415361311 | 0.0156782   | yes |
| Adam18        | 0.773368299 | 1.709255774 | 0.013890496 | -0.750386216 | -1.682243114 | 0.016448741 | yes |

|               |             |             |             |              |              |             |     |
|---------------|-------------|-------------|-------------|--------------|--------------|-------------|-----|
| 3010026O09Rik | 0.820439694 | 1.765944122 | 0.000753096 | -0.551732323 | -1.46584476  | 0.013258109 | yes |
| A930005H10Rik | 0.82376712  | 1.770021789 | 0.000696262 | -0.797617619 | -1.738228348 | 0.000921839 | yes |
| Ucma          | 0.831025294 | 1.778949176 | 0.022887966 | -0.84916372  | -1.801456381 | 0.020474738 | yes |
| Efhc2         | 0.832542664 | 1.780821189 | 0.019455861 | -0.785561576 | -1.723763171 | 0.026172759 | yes |
| 1700003M02Rik | 0.890505593 | 1.853825684 | 0.010527085 | -0.916802774 | -1.887926728 | 0.008804347 | yes |
| Myh3          | 1.024674345 | 2.034500091 | 0.001711059 | -0.839232696 | -1.789098348 | 0.007203187 | yes |
| Gm35612       | 1.088533208 | 2.126577168 | 0.011678383 | -0.918744111 | -1.890468894 | 0.028893336 | yes |
| Acr           | 1.188498616 | 2.279154327 | 0.003831537 | -0.803141084 | -1.74489604  | 0.036724212 | yes |
| Gm11978       | 1.507810176 | 2.843780624 | 0.002202035 | -1.236209755 | -2.355788065 | 0.008777633 | yes |
| Gnb4          | 0.263550135 | 1.200429048 | 0.041158987 | -0.162353657 | -1.119111402 | 0.19062915  | no  |
| Rraga         | 0.264039266 | 1.200836111 | 0.039627033 | -0.165710023 | -1.121717996 | 0.17821279  | no  |
| Marc2         | 0.264311814 | 1.201062989 | 0.039133477 | -0.041405527 | -1.029115942 | 0.729696798 | no  |
| Wnt7b         | 0.264510515 | 1.201228421 | 0.018948833 | -0.117532677 | -1.084877898 | 0.263944442 | no  |
| Iscu          | 0.264637738 | 1.201334356 | 0.02366523  | -0.198333379 | -1.147372129 | 0.07957084  | no  |
| Sstr1         | 0.265357425 | 1.201933789 | 0.010470638 | -0.173939691 | -1.128134977 | 0.075976916 | no  |
| Ccdc71        | 0.265884081 | 1.202372636 | 0.030141049 | -0.166311123 | -1.122185458 | 0.156565777 | no  |
| Pnma3         | 0.266884536 | 1.203206725 | 0.036303802 | -0.142488484 | -1.103807416 | 0.240710871 | no  |
| Gpr61         | 0.267503248 | 1.203722842 | 0.042247758 | -0.158072344 | -1.115795272 | 0.211023413 | no  |
| Gpr85         | 0.268427119 | 1.204493927 | 0.022528036 | -0.144549024 | -1.105385064 | 0.193428503 | no  |
| Slc25a11      | 0.269315505 | 1.205235861 | 0.038838074 | -0.130266114 | -1.094495569 | 0.291515683 | no  |
| Zfp330        | 0.269716926 | 1.205571257 | 0.024564236 | -0.156331083 | -1.114449376 | 0.170110332 | no  |
| Lcorl         | 0.270001593 | 1.205809159 | 0.048740462 | -0.182283305 | -1.134678282 | 0.169418677 | no  |
| Coq7          | 0.27021611  | 1.205988466 | 0.04477379  | -0.222623826 | -1.166853812 | 0.091906177 | no  |
| Carkd         | 0.271810631 | 1.207322107 | 0.026839285 | -0.124713551 | -1.090291233 | 0.280617409 | no  |
| Sumo3         | 0.272064301 | 1.20753441  | 0.016408714 | -0.154783661 | -1.113254668 | 0.14731976  | no  |
| Tceal1        | 0.272831486 | 1.208176714 | 0.039244582 | -0.180915392 | -1.13360293  | 0.15634461  | no  |
| Cnrip1        | 0.273032398 | 1.208344978 | 0.024400342 | -0.17340736  | -1.12771879  | 0.134139027 | no  |
| Ap2m1         | 0.273092064 | 1.208394953 | 0.037746017 | -0.155240617 | -1.113607334 | 0.214943159 | no  |
| Rpl22l1       | 0.273297968 | 1.20856743  | 0.012159457 | -0.192565482 | -1.142794091 | 0.064062501 | no  |
| Grb10         | 0.273633016 | 1.208848138 | 0.021508202 | -0.062474663 | -1.044255443 | 0.569658678 | no  |
| Zdhhc16       | 0.276057203 | 1.210881094 | 0.01998788  | -0.170654037 | -1.125568638 | 0.130219516 | no  |
| Pls3          | 0.276118604 | 1.210932631 | 0.020340525 | -0.204547811 | -1.152325112 | 0.074440882 | no  |
| Prpf31        | 0.276966518 | 1.21164454  | 0.047584031 | -0.073792578 | -1.052479825 | 0.575708442 | no  |
| Zc4h2         | 0.277061721 | 1.211724499 | 0.034924297 | -0.18941387  | -1.140300347 | 0.135008748 | no  |
| Tm7sf2        | 0.277282796 | 1.211910195 | 0.044854333 | -0.210405945 | -1.157013698 | 0.118352509 | no  |
| Ncald         | 0.278576764 | 1.212997658 | 0.043221315 | -0.190537291 | -1.141188641 | 0.151332429 | no  |
| Efnb3         | 0.280297742 | 1.214445495 | 0.040311936 | -0.183053097 | -1.135283884 | 0.163464014 | no  |
| Eif6          | 0.281428263 | 1.215397529 | 0.024651163 | -0.111608345 | -1.080432052 | 0.340790109 | no  |
| Snca          | 0.281556542 | 1.215505601 | 0.029993207 | -0.176995023 | -1.130526667 | 0.152773127 | no  |



|               |             |             |             |              |              |             |    |
|---------------|-------------|-------------|-------------|--------------|--------------|-------------|----|
| Pigp          | 0.283060362 | 1.216773267 | 0.036468696 | -0.131611401 | -1.095516642 | 0.304915019 | no |
| Wibg          | 0.283528233 | 1.217167935 | 0.037727022 | -0.221554704 | -1.165989425 | 0.095938762 | no |
| Zscan18       | 0.283617721 | 1.217243436 | 0.022115192 | -0.115348018 | -1.083236321 | 0.318894607 | no |
| Prss12        | 0.283951301 | 1.21752492  | 0.03091357  | -0.139038311 | -1.101170839 | 0.263832242 | no |
| Rabac1        | 0.284640904 | 1.218107031 | 0.033953686 | -0.140431498 | -1.102234736 | 0.267653302 | no |
| Nelfe         | 0.285043419 | 1.218446933 | 0.031475353 | -0.140074647 | -1.101962131 | 0.264304825 | no |
| Lrrc24        | 0.285422954 | 1.218767517 | 0.016083432 | -0.167920351 | -1.123437878 | 0.133539911 | no |
| Coasy         | 0.285902082 | 1.219172344 | 0.032314421 | -0.179842968 | -1.132760582 | 0.160164601 | no |
| Orc6          | 0.286584655 | 1.2197493   | 0.041645352 | -0.208061616 | -1.155135118 | 0.127680378 | no |
| Tmem29        | 0.287685488 | 1.220680372 | 0.040240709 | -0.212570589 | -1.158751004 | 0.118793862 | no |
| Pex11b        | 0.288882967 | 1.221693993 | 0.043089004 | -0.207479572 | -1.154669182 | 0.1338793   | no |
| Smyd3         | 0.289017949 | 1.221808302 | 0.045528948 | -0.131398814 | -1.095355225 | 0.338545868 | no |
| Ngfrap1       | 0.291434871 | 1.223856892 | 0.02201971  | -0.150280506 | -1.109785229 | 0.208401789 | no |
| Tmem199       | 0.291672652 | 1.224058621 | 0.017819757 | -0.226732371 | -1.170181545 | 0.057043936 | no |
| 1700037H04Rik | 0.292733522 | 1.22495905  | 0.02871613  | -0.116598795 | -1.084175864 | 0.352408348 | no |
| Isoc1         | 0.294852275 | 1.226759357 | 0.046351861 | -0.200337204 | -1.148966874 | 0.162031144 | no |
| 2210015D19Rik | 0.295156475 | 1.227018053 | 0.043460649 | -0.215176954 | -1.160846289 | 0.129742991 | no |
| Acat2         | 0.296328536 | 1.2280153   | 0.015697478 | -0.141771414 | -1.103258922 | 0.215175862 | no |
| Slc35b2       | 0.297976287 | 1.22941866  | 0.021059097 | -0.131581373 | -1.095493841 | 0.276070766 | no |
| Lhpp          | 0.299420286 | 1.230649805 | 0.023620672 | -0.215585174 | -1.161174805 | 0.090877976 | no |
| Nfkbib        | 0.300079142 | 1.231211952 | 0.045065518 | -0.241481152 | -1.182205758 | 0.099536564 | no |
| Sf3b6         | 0.300334062 | 1.231429523 | 0.019928229 | -0.208385345 | -1.15539435  | 0.092081064 | no |
| Rnasel        | 0.300856673 | 1.231875685 | 0.028128454 | -0.181411961 | -1.133993178 | 0.16531724  | no |
| Ahr           | 0.300923198 | 1.231932489 | 0.049560122 | -0.281607731 | -1.21554873  | 0.06422471  | no |
| Trappc2l      | 0.301467239 | 1.23239714  | 0.025237459 | -0.110525958 | -1.079621758 | 0.379728136 | no |
| Klf15         | 0.302299484 | 1.233108276 | 0.038005986 | -0.119566825 | -1.086408615 | 0.384964787 | no |
| Zcchc12       | 0.304506761 | 1.234996336 | 0.008394114 | -0.136713887 | -1.099398097 | 0.19700961  | no |
| Psmc9         | 0.305462274 | 1.235814558 | 0.01842273  | -0.208248391 | -1.155284674 | 0.092918528 | no |
| lft81         | 0.305519596 | 1.235863661 | 0.0101765   | -0.205884166 | -1.153392995 | 0.067657849 | no |
| Supt4a        | 0.30614265  | 1.236397507 | 0.019023619 | -0.23206095  | -1.17451159  | 0.065745243 | no |
| Tuba1a        | 0.306256309 | 1.236494917 | 0.022989111 | -0.21163244  | -1.157997742 | 0.100457992 | no |
| Cdh13         | 0.306540833 | 1.236738799 | 0.028207395 | -0.266214376 | -1.202647942 | 0.052191232 | no |
| Sdr39u1       | 0.30679258  | 1.236954625 | 0.018752989 | -0.167000291 | -1.122721649 | 0.174196436 | no |
| Stmn4         | 0.30762419  | 1.237667846 | 0.009560701 | -0.160121156 | -1.11738097  | 0.145240661 | no |
| Tmem9         | 0.307871898 | 1.23788037  | 0.026260011 | -0.166943868 | -1.12267774  | 0.20199185  | no |
| Lingo2        | 0.308156239 | 1.238124369 | 0.020616932 | -0.185878605 | -1.137509508 | 0.141338948 | no |
| Psen2         | 0.308818061 | 1.238692476 | 0.033695175 | -0.206658926 | -1.15401256  | 0.139982372 | no |
| Apoa1bp       | 0.30890012  | 1.238762934 | 0.046207102 | -0.139900159 | -1.101828862 | 0.341357519 | no |
| Pithd1        | 0.310380407 | 1.240034627 | 0.017474634 | -0.216879728 | -1.162217214 | 0.082342666 | no |

|               |             |             |             |              |              |             |    |
|---------------|-------------|-------------|-------------|--------------|--------------|-------------|----|
| Ydjc          | 0.311321897 | 1.240844126 | 0.032946162 | -0.149381833 | -1.109094144 | 0.279850595 | no |
| Ube2s         | 0.312388229 | 1.241761604 | 0.017879722 | -0.210641889 | -1.157202936 | 0.094185665 | no |
| Pet100        | 0.312778835 | 1.242097854 | 0.037520364 | -0.279086112 | -1.213425986 | 0.060096635 | no |
| Wdpcp         | 0.313253914 | 1.242506943 | 0.043109239 | -0.22835709  | -1.17150011  | 0.129084606 | no |
| Lrrcc1        | 0.313944484 | 1.243101832 | 0.019527003 | -0.148573174 | -1.108472649 | 0.23786186  | no |
| Tab1          | 0.314012431 | 1.243160381 | 0.011947981 | -0.16670471  | -1.122491648 | 0.152472389 | no |
| Cntn6         | 0.315381632 | 1.244340772 | 0.042629328 | -0.157604938 | -1.115433834 | 0.287855791 | no |
| Chid1         | 0.315392193 | 1.244349881 | 0.023565004 | -0.20634186  | -1.153758967 | 0.120751272 | no |
| Snx8          | 0.31632719  | 1.245156594 | 0.038047408 | -0.185458519 | -1.137178335 | 0.204052239 | no |
| Thtpa         | 0.317432684 | 1.246111085 | 0.020205776 | -0.22721945  | -1.170576686 | 0.083804883 | no |
| Yif1a         | 0.317488442 | 1.246159246 | 0.038863344 | -0.27631112  | -1.21109423  | 0.067958915 | no |
| 1110004F10Rik | 0.317632583 | 1.246283758 | 0.006864883 | -0.193206442 | -1.143301924 | 0.078013808 | no |
| Dolk          | 0.318784303 | 1.247279077 | 0.021817578 | -0.234351832 | -1.1763781   | 0.080487395 | no |
| Glt8d2        | 0.318860432 | 1.247344896 | 0.036940654 | -0.140780527 | -1.10250143  | 0.329656895 | no |
| Lrrc61        | 0.318959899 | 1.247430898 | 0.048252476 | -0.144779267 | -1.105561489 | 0.345991862 | no |
| Cdk11         | 0.320202717 | 1.248505968 | 0.03621484  | -0.268151678 | -1.204263985 | 0.073730607 | no |
| Tceal6        | 0.322529808 | 1.250521454 | 0.027083608 | -0.193054584 | -1.143181587 | 0.164219473 | no |
| Tceal8        | 0.322741617 | 1.250705062 | 0.007357533 | -0.159454322 | -1.116864621 | 0.149888425 | no |
| Cdc26         | 0.323057727 | 1.250979135 | 0.033219852 | -0.215238622 | -1.160895911 | 0.140470058 | no |
| Omg           | 0.323490334 | 1.25135431  | 0.014267681 | -0.200193043 | -1.14885207  | 0.107513774 | no |
| Snrnp25       | 0.324022673 | 1.251816132 | 0.036074598 | -0.215187633 | -1.160854882 | 0.148475132 | no |
| C030006K11Rik | 0.324080852 | 1.251866614 | 0.047456149 | -0.295043383 | -1.226921871 | 0.068379814 | no |
| Fabp3         | 0.32478696  | 1.252479474 | 0.021395037 | -0.162667746 | -1.11935507  | 0.218000154 | no |
| Tceal5        | 0.326028895 | 1.253558127 | 0.015647789 | -0.181916768 | -1.134390037 | 0.150696911 | no |
| Dpysl3        | 0.3272343   | 1.254605942 | 0.013466104 | -0.159036241 | -1.116541009 | 0.195203264 | no |
| Plcd3         | 0.32932505  | 1.256425431 | 0.038101594 | -0.179241562 | -1.132288475 | 0.236923231 | no |
| Tmem86a       | 0.330547106 | 1.257490156 | 0.02056093  | -0.177327083 | -1.130786907 | 0.187589755 | no |
| Fam185a       | 0.330659704 | 1.257588303 | 0.02134511  | -0.225676759 | -1.169325643 | 0.101151774 | no |
| Itпка         | 0.331108703 | 1.257979753 | 0.019626819 | -0.153943227 | -1.112606336 | 0.24219705  | no |
| Thsd4         | 0.331334288 | 1.258176471 | 0.045373396 | -0.113724854 | -1.082018266 | 0.46770334  | no |
| Cisd3         | 0.333822463 | 1.260348285 | 0.033773643 | -0.1768639   | -1.130423921 | 0.237010164 | no |
| Rab33a        | 0.333960772 | 1.260469118 | 0.037028742 | -0.13136079  | -1.095326357 | 0.383875842 | no |
| Tubb2a        | 0.334350004 | 1.260809232 | 0.022562622 | -0.20283506  | -1.150957897 | 0.142730825 | no |
| Acot9         | 0.335577081 | 1.261882064 | 0.025617539 | -0.278753665 | -1.213146402 | 0.057898067 | no |
| Sfxn4         | 0.337767348 | 1.263799279 | 0.027361682 | -0.228009181 | -1.171217635 | 0.12109515  | no |
| Rbp4          | 0.341184795 | 1.266796507 | 0.012545763 | -0.232195844 | -1.174621414 | 0.07411082  | no |
| Ddt           | 0.344025639 | 1.269293443 | 0.015493989 | -0.195528197 | -1.145143342 | 0.143792288 | no |
| Fbll1         | 0.34768045  | 1.272513049 | 0.008587012 | -0.184800958 | -1.136660142 | 0.131772028 | no |
| Ofd1          | 0.350006941 | 1.274566759 | 0.038149864 | -0.286009663 | -1.219263261 | 0.083555433 | no |

|               |             |             |             |              |              |             |    |
|---------------|-------------|-------------|-------------|--------------|--------------|-------------|----|
| Emc9          | 0.350355514 | 1.274874748 | 0.013023368 | -0.194702205 | -1.144487896 | 0.140760535 | no |
| Ndufb4        | 0.35117386  | 1.275598105 | 0.014640987 | -0.220270766 | -1.164952205 | 0.104676379 | no |
| Slc22a8       | 0.353714567 | 1.27784652  | 0.02665934  | -0.111969987 | -1.080702919 | 0.45176238  | no |
| Cxx1a         | 0.354365417 | 1.278423131 | 0.034692249 | -0.176754369 | -1.130338102 | 0.26714057  | no |
| Dnajc30       | 0.354414466 | 1.278466596 | 0.020167095 | -0.184132595 | -1.13613368  | 0.198322756 | no |
| Arrdc1        | 0.360578023 | 1.283940211 | 0.048683134 | -0.128696656 | -1.093305553 | 0.457957875 | no |
| St6gal2       | 0.361370697 | 1.284645853 | 0.030600525 | -0.14011239  | -1.101990961 | 0.372199844 | no |
| Hint2         | 0.361712984 | 1.284950678 | 0.011271138 | -0.238763893 | -1.179981215 | 0.077391783 | no |
| Mrgpre        | 0.361719085 | 1.284956112 | 0.019688356 | -0.277174683 | -1.211819379 | 0.064691569 | no |
| Zfp575        | 0.361760765 | 1.284993235 | 0.04040521  | -0.261320792 | -1.198575502 | 0.126994684 | no |
| 6430573F11Rik | 0.362835511 | 1.285950857 | 0.043956423 | -0.236820607 | -1.178392871 | 0.173070817 | no |
| Cryl1         | 0.364265075 | 1.287225735 | 0.027592675 | -0.227850183 | -1.171088563 | 0.149462093 | no |
| A930017M01Rik | 0.364967298 | 1.287852437 | 0.040155726 | -0.211911843 | -1.15822203  | 0.213564153 | no |
| Kiss1r        | 0.368191708 | 1.290733994 | 0.042992685 | -0.220795462 | -1.165375966 | 0.206415287 | no |
| Znhit2        | 0.369674069 | 1.292060897 | 0.011876477 | -0.21874693  | -1.163722383 | 0.113046786 | no |
| Tpst2         | 0.369933126 | 1.292292927 | 0.017967808 | -0.196211024 | -1.145685466 | 0.181405628 | no |
| Pcsk5         | 0.370129819 | 1.292469127 | 0.017607208 | -0.211968318 | -1.15826737  | 0.149723395 | no |
| Tmem192       | 0.371518344 | 1.293713665 | 0.022860889 | -0.309594514 | -1.239359315 | 0.052282816 | no |
| Syt5          | 0.372466576 | 1.294564257 | 0.004761653 | -0.228897779 | -1.171939244 | 0.060566439 | no |
| Tmem141       | 0.372509649 | 1.294602908 | 0.012936821 | -0.182956315 | -1.135207727 | 0.189311556 | no |
| Sdr42e1       | 0.374031849 | 1.295969575 | 0.017252787 | -0.198789178 | -1.147734682 | 0.177838732 | no |
| Tctex1d2      | 0.374647361 | 1.296522606 | 0.034926573 | -0.267857192 | -1.204018193 | 0.119184892 | no |
| Mzt2          | 0.375178493 | 1.297000012 | 0.017977727 | -0.224910023 | -1.168704358 | 0.134124375 | no |
| Gpr62         | 0.376644112 | 1.298318291 | 0.016394801 | -0.211880499 | -1.158196867 | 0.15156064  | no |
| Pnck          | 0.378254592 | 1.299768412 | 0.002511966 | -0.216341705 | -1.16178387  | 0.05801157  | no |
| Pcdhb20       | 0.379279302 | 1.300691933 | 0.01493473  | -0.210349375 | -1.156968331 | 0.150584675 | no |
| Sdhaf1        | 0.379597751 | 1.300979069 | 0.047989385 | -0.225225078 | -1.168959606 | 0.222493989 | no |
| Fxyd1         | 0.379875232 | 1.301229317 | 0.036882253 | -0.061624489 | -1.043640249 | 0.716846054 | no |
| Lgals1        | 0.380974255 | 1.302220951 | 0.024679474 | -0.213951625 | -1.159860762 | 0.183409194 | no |
| Epm2a         | 0.38147294  | 1.302671157 | 0.016706851 | -0.294417789 | -1.226389958 | 0.056012217 | no |
| Tuba1b        | 0.384704961 | 1.305592759 | 0.035637656 | -0.209053384 | -1.155929478 | 0.222097593 | no |
| Jsrp1         | 0.385359804 | 1.306185505 | 0.049814877 | -0.133975568 | -1.097313355 | 0.471955342 | no |
| Sh2d3c        | 0.385672055 | 1.306468241 | 0.016301049 | -0.193883578 | -1.143838665 | 0.195745078 | no |
| Fabp5         | 0.391657196 | 1.311899493 | 0.040052868 | -0.150295764 | -1.109796966 | 0.394209405 | no |
| B230217O12Rik | 0.393110278 | 1.313221503 | 0.027010502 | -0.270222399 | -1.205993724 | 0.114028074 | no |
| Ccdc65        | 0.395027003 | 1.314967373 | 0.031526345 | -0.200303182 | -1.148939779 | 0.250134645 | no |
| Usb1          | 0.395642239 | 1.315528258 | 0.033175184 | -0.355173743 | -1.279139618 | 0.052773777 | no |
| Bmyc          | 0.398844214 | 1.318451237 | 0.022083918 | -0.229794683 | -1.172668049 | 0.161183751 | no |
| Zeb2os        | 0.399640111 | 1.319178793 | 0.03842395  | -0.207738714 | -1.154876606 | 0.258635145 | no |

|               |             |             |             |              |              |             |    |
|---------------|-------------|-------------|-------------|--------------|--------------|-------------|----|
| A830009L08Rik | 0.399645023 | 1.319183284 | 0.048704858 | -0.171541104 | -1.126260927 | 0.373931871 | no |
| Man1a         | 0.403162717 | 1.322403747 | 0.008306464 | -0.162536045 | -1.119252892 | 0.2408636   | no |
| Rpl14         | 0.404074743 | 1.323239992 | 0.021749619 | -0.18850384  | -1.13958129  | 0.243355474 | no |
| Rft1          | 0.404769875 | 1.323877721 | 0.019736914 | -0.167540836 | -1.123142386 | 0.300418166 | no |
| Gpr135        | 0.405787359 | 1.324811737 | 0.027235464 | -0.257794389 | -1.195649382 | 0.142586502 | no |
| Amigo2        | 0.409098824 | 1.327856113 | 0.03811678  | -0.248693945 | -1.188131027 | 0.188283424 | no |
| Polm          | 0.411248946 | 1.32983656  | 0.049940865 | -0.185075228 | -1.136876253 | 0.354676848 | no |
| Tmem138       | 0.412491723 | 1.330982611 | 0.021045582 | -0.202998856 | -1.151088579 | 0.226766886 | no |
| Spag6         | 0.41390457  | 1.332286696 | 0.030292018 | -0.274159652 | -1.209289491 | 0.135355474 | no |
| Trem2         | 0.416523572 | 1.334707464 | 0.016579946 | -0.290307707 | -1.222901078 | 0.080959055 | no |
| Nsmce1        | 0.417148451 | 1.335285695 | 0.006684383 | -0.271870942 | -1.20737258  | 0.059759624 | no |
| Alg14         | 0.417811376 | 1.335899406 | 0.014766853 | -0.242112423 | -1.182723161 | 0.133482514 | no |
| Dbp           | 0.418429977 | 1.336472337 | 0.003527761 | -0.161331658 | -1.118318909 | 0.205197537 | no |
| Fan1          | 0.418675721 | 1.336700007 | 0.040924377 | -0.209246409 | -1.156084147 | 0.283404968 | no |
| Nrep          | 0.418891979 | 1.336900392 | 0.005899857 | -0.232372506 | -1.174765258 | 0.095476528 | no |
| Vwc2l         | 0.420293322 | 1.338199603 | 0.016828404 | -0.167029783 | -1.1227446   | 0.305575738 | no |
| Scd3          | 0.422691494 | 1.340425925 | 0.04992302  | -0.2829708   | -1.216697733 | 0.175207068 | no |
| Grp           | 0.423968827 | 1.341613235 | 0.006957316 | -0.209154929 | -1.156010842 | 0.147171862 | no |
| Cpxm2         | 0.429492049 | 1.34675932  | 0.041326223 | -0.253641148 | -1.192212288 | 0.209064928 | no |
| Ccdc94        | 0.430006167 | 1.347239336 | 0.02106906  | -0.28195433  | -1.215840794 | 0.113320675 | no |
| Gm1821        | 0.433584996 | 1.350585521 | 0.031614605 | -0.26915416  | -1.20510108  | 0.156482113 | no |
| Lor           | 0.43568648  | 1.352554268 | 0.020221196 | -0.275300237 | -1.210245926 | 0.123261057 | no |
| Hist1h1c      | 0.438324145 | 1.355029391 | 0.014745222 | -0.272994127 | -1.208312925 | 0.108541392 | no |
| Nppc          | 0.438514065 | 1.355207783 | 0.039973535 | -0.251662577 | -1.19057836  | 0.21821539  | no |
| Tagln         | 0.441928848 | 1.358419287 | 0.040834039 | -0.31238547  | -1.241759229 | 0.135656904 | no |
| Rnf8          | 0.44329052  | 1.359702022 | 0.048308697 | -0.278114647 | -1.212609178 | 0.198948233 | no |
| 2810029C07Rik | 0.445595822 | 1.361876445 | 0.015245744 | -0.235399608 | -1.17723277  | 0.171172113 | no |
| Nipsnap3b     | 0.447893109 | 1.364046767 | 0.024598497 | -0.381130564 | -1.302362048 | 0.05094948  | no |
| Cutc          | 0.450502271 | 1.366515923 | 0.037869869 | -0.192667618 | -1.142874999 | 0.348091806 | no |
| Pcsk2os2      | 0.451116633 | 1.367097969 | 0.009654837 | -0.216596106 | -1.161988754 | 0.177674464 | no |
| Bola1         | 0.452212306 | 1.368136623 | 0.040804483 | -0.250182747 | -1.189357762 | 0.236593719 | no |
| Dtwd1         | 0.454156001 | 1.36998111  | 0.016966346 | -0.342667946 | -1.268099497 | 0.061784151 | no |
| Bex2          | 0.456252741 | 1.371973619 | 0.004723326 | -0.273069313 | -1.208375898 | 0.064004275 | no |
| Pla2g4e       | 0.457409468 | 1.373074084 | 0.03034853  | -0.215692699 | -1.161261352 | 0.279777914 | no |
| Htr1a         | 0.462248114 | 1.37768696  | 0.00491152  | -0.285443408 | -1.218784796 | 0.061642773 | no |
| Pcdha12       | 0.463958231 | 1.379320987 | 0.046867814 | -0.348220248 | -1.272989261 | 0.125634054 | no |
| Tnfaip8l1     | 0.464934388 | 1.380254579 | 0.005267613 | -0.300296209 | -1.231397214 | 0.05387048  | no |
| Gm6297        | 0.465196805 | 1.380505662 | 0.046762294 | -0.268361932 | -1.204439504 | 0.232211103 | no |
| Crym          | 0.467085008 | 1.382313654 | 0.009927818 | -0.320700266 | -1.24893662  | 0.058084177 | no |

|               |             |             |             |              |              |             |    |
|---------------|-------------|-------------|-------------|--------------|--------------|-------------|----|
| Gpr39         | 0.47275211  | 1.387754249 | 0.001352075 | -0.190955837 | -1.141519763 | 0.134772579 | no |
| Mzf1          | 0.473143412 | 1.3881307   | 0.014899462 | -0.254377526 | -1.19282097  | 0.162518453 | no |
| Armcx6        | 0.473273131 | 1.388255519 | 0.049061846 | -0.355839431 | -1.279729975 | 0.129085744 | no |
| Cntnap3       | 0.474228427 | 1.389175071 | 0.01886717  | -0.297634598 | -1.229127517 | 0.12106118  | no |
| Smim18        | 0.4744996   | 1.38943621  | 0.039257355 | -0.260961076 | -1.198276691 | 0.235285205 | no |
| Tacc3         | 0.47740724  | 1.392239334 | 0.027079982 | -0.297495084 | -1.229008662 | 0.149432863 | no |
| Fbn1          | 0.478823929 | 1.393607148 | 0.045663754 | -0.106883517 | -1.076899424 | 0.634301134 | no |
| Acta2         | 0.48249799  | 1.397160722 | 0.042334059 | -0.250711395 | -1.189793659 | 0.267879983 | no |
| 6430584L05Rik | 0.483675993 | 1.398302011 | 0.028914897 | -0.416710153 | -1.334880091 | 0.055325559 | no |
| Marcksl1      | 0.484271552 | 1.398879363 | 0.01197469  | -0.164447065 | -1.120736456 | 0.334760564 | no |
| Aloxe3        | 0.484887188 | 1.399476429 | 0.043112322 | -0.193685565 | -1.143681681 | 0.393811577 | no |
| Srd5a1        | 0.486868608 | 1.401399812 | 0.005635845 | -0.316195523 | -1.24504296  | 0.054831297 | no |
| B230216N24Rik | 0.487576446 | 1.402087558 | 0.012750874 | -0.244866475 | -1.184983093 | 0.179021517 | no |
| Ethe1         | 0.487911955 | 1.402413661 | 0.015641047 | -0.274389997 | -1.209482586 | 0.148427068 | no |
| Chchd5        | 0.488341442 | 1.402831219 | 0.029630062 | -0.409871757 | -1.328567711 | 0.062409775 | no |
| Zfp810        | 0.488947023 | 1.40342019  | 0.009283662 | -0.150324769 | -1.109819279 | 0.377981395 | no |
| Amdhd2        | 0.489251347 | 1.403716261 | 0.008958851 | -0.21866136  | -1.163653361 | 0.203400677 | no |
| Slc37a1       | 0.489748145 | 1.40419972  | 0.024917508 | -0.338937856 | -1.264825059 | 0.106422405 | no |
| Ifitm7        | 0.490679384 | 1.405106403 | 0.015321965 | -0.345676521 | -1.270746732 | 0.071723617 | no |
| Galns         | 0.491296567 | 1.405707635 | 0.014685836 | -0.197168165 | -1.146445811 | 0.289556654 | no |
| Cirbp         | 0.496226764 | 1.41051965  | 0.020215138 | -0.154833524 | -1.113293145 | 0.420691567 | no |
| Ap1s3         | 0.500755799 | 1.414954635 | 0.039440388 | -0.276690134 | -1.211412442 | 0.2336687   | no |
| Angpt1        | 0.500917834 | 1.415113563 | 0.037514153 | -0.273463354 | -1.208705984 | 0.232621179 | no |
| Lypd1         | 0.502876008 | 1.417035604 | 0.000583743 | -0.23154877  | -1.174094693 | 0.065286005 | no |
| 3830408C21Rik | 0.507120216 | 1.421210464 | 0.034918012 | -0.452132608 | -1.368061046 | 0.056674529 | no |
| Slc16a10      | 0.512325107 | 1.426347104 | 0.031068193 | -0.439372894 | -1.356014771 | 0.059729988 | no |
| Chac1         | 0.513163649 | 1.427176385 | 0.041495003 | -0.298771133 | -1.230096188 | 0.215129991 | no |
| Pced1b        | 0.516303207 | 1.430285553 | 0.031257547 | -0.293670166 | -1.225754592 | 0.198574779 | no |
| Kcnj8         | 0.519506123 | 1.433464447 | 0.030278895 | -0.259428605 | -1.197004524 | 0.253183451 | no |
| Hdhd3         | 0.523390493 | 1.437329164 | 0.024864978 | -0.311952461 | -1.241386585 | 0.159968017 | no |
| S100a11       | 0.53050102  | 1.444430731 | 0.024027867 | -0.382119376 | -1.303254983 | 0.091764234 | no |
| Tipin         | 0.532262961 | 1.44619587  | 0.014625106 | -0.293489243 | -1.225600884 | 0.15137952  | no |
| 1700018L02Rik | 0.535808751 | 1.449754635 | 0.019563469 | -0.22412431  | -1.168068037 | 0.294726408 | no |
| Ciart         | 0.537009796 | 1.45096206  | 0.00668036  | -0.239127152 | -1.180278363 | 0.185517116 | no |
| Exo5          | 0.539461531 | 1.453429941 | 0.015442234 | -0.370457083 | -1.292762346 | 0.08150999  | no |
| Zcchc16       | 0.54156698  | 1.455552605 | 0.048524358 | -0.463744974 | -1.379117113 | 0.086263535 | no |
| 4930413G21Rik | 0.55203259  | 1.466149876 | 0.024600575 | -0.27789187  | -1.212421945 | 0.228738844 | no |
| Lyplal1       | 0.555948863 | 1.470135226 | 0.013648586 | -0.343641849 | -1.268955827 | 0.106581556 | no |
| C8g           | 0.558640557 | 1.472880676 | 0.044375431 | -0.331269356 | -1.258119845 | 0.214517795 | no |

|               |             |             |             |              |              |             |    |
|---------------|-------------|-------------|-------------|--------------|--------------|-------------|----|
| Birc3         | 0.561081394 | 1.475374692 | 0.047155825 | -0.163812745 | -1.120243803 | 0.539534303 | no |
| Nudt8         | 0.564084367 | 1.478448886 | 0.010532417 | -0.404409308 | -1.323546891 | 0.054616816 | no |
| Col5a2        | 0.566596287 | 1.481025301 | 0.017385327 | -0.441303612 | -1.357830702 | 0.055610885 | no |
| E130317F20Rik | 0.570390242 | 1.484925181 | 0.04606483  | -0.336214397 | -1.262439628 | 0.220935036 | no |
| Phf7          | 0.580094632 | 1.494947305 | 0.047960266 | -0.40830876  | -1.327129137 | 0.151479663 | no |
| Ninl          | 0.580401814 | 1.495265647 | 0.007691886 | -0.327304071 | -1.254666618 | 0.104883763 | no |
| Wdr5b         | 0.580508988 | 1.49537673  | 0.024115937 | -0.309777558 | -1.23951657  | 0.20303054  | no |
| Naglu         | 0.584404376 | 1.499419818 | 0.013400583 | -0.321997273 | -1.25005994  | 0.14547189  | no |
| Bex1          | 0.586893457 | 1.502009    | 0.007351644 | -0.307168188 | -1.23727671  | 0.119785153 | no |
| Eln           | 0.586975995 | 1.502094933 | 0.030201657 | -0.321366588 | -1.249513586 | 0.208371292 | no |
| Opn3          | 0.589462325 | 1.504685864 | 0.007773431 | -0.391595953 | -1.311843803 | 0.06072254  | no |
| Bbc3          | 0.596149205 | 1.511676259 | 0.023002662 | -0.32979018  | -1.256830573 | 0.183384574 | no |
| Aldh1a3       | 0.599416338 | 1.515103487 | 0.009608633 | -0.409790609 | -1.328492984 | 0.061923808 | no |
| 1600029015Rik | 0.605462251 | 1.521466166 | 0.032964136 | -0.483693641 | -1.398319115 | 0.080860711 | no |
| Neur12        | 0.606635115 | 1.52270357  | 0.021254308 | -0.333823538 | -1.260349223 | 0.179679904 | no |
| Usp43         | 0.610614474 | 1.526909413 | 0.011866136 | -0.33248579  | -1.259181098 | 0.142411442 | no |
| Cited4        | 0.613115014 | 1.529558212 | 0.009596487 | -0.254854846 | -1.193215684 | 0.240260992 | no |
| 4732491K20Rik | 0.614864103 | 1.531413737 | 0.034725936 | -0.287549553 | -1.220565361 | 0.297141882 | no |
| Sfrp2         | 0.615321221 | 1.531899042 | 0.046073147 | -0.346735671 | -1.27167999  | 0.241142024 | no |
| Slc7a3        | 0.625240102 | 1.542467511 | 0.00518401  | -0.394128062 | -1.314148273 | 0.057654741 | no |
| Casp7         | 0.625608758 | 1.542861713 | 0.024350438 | -0.433447776 | -1.350457068 | 0.104582024 | no |
| 1700101111Rik | 0.628479727 | 1.54593507  | 0.035822681 | -0.321564257 | -1.249684798 | 0.250559702 | no |
| Gjb2          | 0.631146972 | 1.548795828 | 0.029978548 | -0.178199432 | -1.131470862 | 0.505021048 | no |
| Scarf2        | 0.637063537 | 1.55516056  | 0.026805299 | -0.282741328 | -1.216504223 | 0.295973499 | no |
| Sema3b        | 0.642036841 | 1.56053081  | 0.030903984 | -0.351672442 | -1.276039017 | 0.213805595 | no |
| Aldh1a2       | 0.653730802 | 1.573231308 | 0.009012251 | -0.281322683 | -1.215308586 | 0.21973885  | no |
| Cd74          | 0.655892016 | 1.575589836 | 0.024118258 | -0.207654956 | -1.15480956  | 0.442689676 | no |
| Serping1      | 0.660311197 | 1.580423493 | 0.011428913 | -0.173132465 | -1.127503932 | 0.465796626 | no |
| Gm10790       | 0.664285162 | 1.584782837 | 0.038918827 | -0.620296624 | -1.537191201 | 0.051937122 | no |
| Slc41a3       | 0.665801288 | 1.586449159 | 0.004291507 | -0.395232758 | -1.315154924 | 0.06645444  | no |
| Acot6         | 0.675250989 | 1.596874561 | 0.020719216 | -0.469759946 | -1.384879015 | 0.093513275 | no |
| Pcdhb8        | 0.67840829  | 1.600373106 | 0.042873844 | -0.429221756 | -1.346507024 | 0.183441513 | no |
| Mxra8         | 0.681466337 | 1.603768977 | 0.013722427 | -0.259407514 | -1.196987025 | 0.308670698 | no |
| Adrb3         | 0.684282106 | 1.606902178 | 0.008048613 | -0.361693225 | -1.28493308  | 0.130088401 | no |
| Adcy10        | 0.687950741 | 1.610993576 | 0.043118875 | -0.637786852 | -1.555940457 | 0.058642304 | no |
| Dcn           | 0.703289541 | 1.628213111 | 0.003896096 | -0.299031551 | -1.230318251 | 0.170033095 | no |
| Pycard        | 0.704594417 | 1.629686448 | 0.039533552 | -0.55295225  | -1.467084786 | 0.097871038 | no |
| Bche          | 0.706507736 | 1.631849192 | 0.017108122 | -0.112176699 | -1.080857775 | 0.677733529 | no |
| Slc16a5       | 0.721824392 | 1.649266333 | 0.023866814 | -0.55132102  | -1.465426917 | 0.074929715 | no |

|               |             |             |             |              |              |             |    |
|---------------|-------------|-------------|-------------|--------------|--------------|-------------|----|
| Rdh5          | 0.734884455 | 1.664264174 | 0.040690378 | -0.368306399 | -1.290836609 | 0.281498418 | no |
| Capg          | 0.746574872 | 1.677804793 | 0.045450029 | -0.260776935 | -1.198123757 | 0.460182584 | no |
| Msx1os        | 0.747170493 | 1.678497622 | 0.013082758 | -0.432181361 | -1.349272141 | 0.126542905 | no |
| Eya2          | 0.760451621 | 1.694020837 | 0.047452029 | -0.318216091 | -1.246787928 | 0.38282656  | no |
| Cfap61        | 0.778785876 | 1.715686401 | 0.047132076 | -0.724757987 | -1.652623385 | 0.062645096 | no |
| Ccdc110       | 0.786421703 | 1.724791177 | 0.043139258 | -0.576062582 | -1.490775053 | 0.127427476 | no |
| Slc13a4       | 0.789523691 | 1.728503699 | 0.012971215 | -0.233830434 | -1.175953028 | 0.411077277 | no |
| Bambi-ps1     | 0.822342557 | 1.768274875 | 0.018080063 | -0.636074804 | -1.554095116 | 0.058764256 | no |
| Mgp           | 0.824429133 | 1.77083419  | 0.001280112 | -0.31952695  | -1.247921296 | 0.147550541 | no |
| Nlrp6         | 0.846503501 | 1.798137694 | 0.030284874 | -0.54272114  | -1.456717517 | 0.147464387 | no |
| Ccl28         | 0.84889528  | 1.801121218 | 0.02599385  | -0.274940882 | -1.209944507 | 0.436301484 | no |
| Clec3b        | 0.855205727 | 1.809016701 | 0.012695166 | -0.473471797 | -1.388446701 | 0.140527163 | no |
| Aox3          | 0.866688597 | 1.823472695 | 0.018641078 | -0.541466336 | -1.455451067 | 0.121579475 | no |
| Map2k3os      | 0.875709907 | 1.834910769 | 0.031916994 | -0.655975403 | -1.575680908 | 0.097642311 | no |
| Llg12         | 0.893571197 | 1.857769094 | 0.031710733 | -0.56785275  | -1.482315708 | 0.154604814 | no |
| Gm10638       | 0.924283545 | 1.897741573 | 0.020735681 | -0.476149093 | -1.391025718 | 0.205499678 | no |
| Ahrr          | 0.939548044 | 1.917927311 | 0.031190151 | -0.803032905 | -1.744765206 | 0.060702566 | no |
| Ahcy          | 0.958889107 | 1.943812559 | 0.022884657 | -0.52683647  | -1.440766428 | 0.162290287 | no |
| 3110070M22Rik | 1.009315092 | 2.012955239 | 0.028370525 | -0.180096355 | -1.132959551 | 0.673519106 | no |
| Arr3          | 1.021889351 | 2.030576459 | 0.025020023 | -0.636475148 | -1.554526433 | 0.143545931 | no |
| Sec14l3       | 1.027818719 | 2.038939148 | 0.010030297 | -0.578400476 | -1.493192819 | 0.120514742 | no |
| Gm16712       | 1.037354941 | 2.052461189 | 0.039864677 | -0.439612977 | -1.356240448 | 0.35730639  | no |
| Wnt6          | 1.046855374 | 2.066021652 | 0.048298394 | -0.270483536 | -1.206212036 | 0.588150625 | no |
| 1700001G11Rik | 1.066738244 | 2.094692169 | 0.03633697  | -0.694053779 | -1.617823003 | 0.156757117 | no |
| 4933409K07Rik | 1.073513243 | 2.104552126 | 0.017341885 | -0.653510505 | -1.572991097 | 0.126244419 | no |
| H2-Eb1        | 1.081988389 | 2.116951752 | 0.008752855 | -0.483445617 | -1.398078741 | 0.201901169 | no |
| Ptgfr         | 1.127460536 | 2.18473839  | 0.036349898 | -0.451657306 | -1.367610407 | 0.374016417 | no |
| 0610039K10Rik | 1.180220145 | 2.266113537 | 0.020074753 | -0.722543688 | -1.650088825 | 0.121766088 | no |
| Ctcf1         | 1.187112402 | 2.276965452 | 0.028565106 | -0.894545119 | -1.859023644 | 0.088829621 | no |
| Ctxn3         | 1.273132165 | 2.416857085 | 0.012565211 | -0.76018224  | -1.693704559 | 0.113243538 | no |
| Rbm3os        | 1.292612975 | 2.449713402 | 0.04197174  | -0.571067044 | -1.485621957 | 0.328160124 | no |
| Hmga2         | 1.334281226 | 2.521498253 | 0.019830027 | -0.670884178 | -1.59204838  | 0.20624445  | no |
| Gm15421       | 1.376167759 | 2.595779358 | 0.007660707 | -0.781849759 | -1.719333913 | 0.103079104 | no |
| Gm9833        | 1.415295781 | 2.667144115 | 0.03749291  | -0.538914153 | -1.452878594 | 0.393105355 | no |
| Rpl31-ps12    | 2.577914247 | 5.970758623 | 0.048347921 | -1.359709948 | -2.566335784 | 0.247349358 | no |

**Suppl. Table 4 List of genes found in DEGs that overlapped with ASD susceptibility genes (58)**

| <b>Overlapped down-regulated DEGs</b> | <b>Overlapped up-regulated DEGs</b> |
|---------------------------------------|-------------------------------------|
| Megf10                                | Ntng1                               |
| Flt1                                  | Gap43                               |
| Mcm4                                  | Celf6                               |
| Pvalb                                 | Gira2                               |
| Kif13b                                | Cntnap4                             |
| Unc79                                 | Cbln1                               |
| Cdh22                                 | Gpr85                               |
| Pou3f2                                | Cntn6                               |
| Lrrc1                                 | Dolk                                |
| Rasd1                                 | Fabp3                               |
| Oxtr                                  | Dpysl3                              |
| Homer1                                | Ofd1                                |
| Zswim6                                | Fabp5                               |
| Per2                                  | Fan1                                |
| Htr7                                  | Pcdha12                             |
| Fat1                                  | Cntnap3                             |
| Kmt2a                                 | Fbn1                                |
| Ccdc88c                               | Ninl                                |
| Nipbl                                 | Aldh1a3                             |
| Nav2                                  | Slc7a3                              |
| Kmt2c                                 |                                     |
| Gatm                                  |                                     |
| Rps6ka3                               |                                     |
| Abca7                                 |                                     |
| Cdk13                                 |                                     |
| Utrn                                  |                                     |
| Kcnj10                                |                                     |
| Myo9b                                 |                                     |
| Ppp1r3c                               |                                     |
| Itpr1                                 |                                     |
| Suclg2                                |                                     |
| Ick                                   |                                     |
| Atp2b2                                |                                     |
| Syne1                                 |                                     |
| Phrf1                                 |                                     |
| Pde4a                                 |                                     |
| Sox5                                  |                                     |
| Trove2                                |                                     |



**Suppl. Table 5 List of genes down-regulated in *Shank3*-deficient mice and recovered by UNC0642 treatment [Het+SAL\_vs\_WT (fold change < -1.2 & *P* < 0.05) and Het+UNC\_vs\_WT (-1.3 < fold change < 1.3 & *P* > 0.05)]**

| Gene Symbol   | logFC (SAL_vs_WT) | Fold change (SAL_vs_WT) | P.Value (SAL_vs_WT) | logFC (UNC_vs_WT) | Fold change (UNC_vs_WT) | P.Value (UNC_vs_WT) | Restored |
|---------------|-------------------|-------------------------|---------------------|-------------------|-------------------------|---------------------|----------|
| Dynlt1b       | -1.686232856      | -3.218152862            | 0.001903647         | 0.086621971       | 1.061880906             | 0.851847966         | yes      |
| Acan          | -1.360379681      | -2.567527414            | 0.00060683          | -0.11886847       | -1.085882852            | 0.71634499          | yes      |
| 3930402G23Rik | -1.254679845      | -2.386141907            | 0.013584285         | -0.269282839      | -1.205208572            | 0.561000844         | yes      |
| Gas2l3        | -1.211515426      | -2.315807645            | 0.007269459         | -0.211140292      | -1.157602781            | 0.600562043         | yes      |
| Klk6          | -1.157947088      | -2.231396805            | 0.026018677         | 0.174956546       | 1.128930401             | 0.716295836         | yes      |
| Gm19710       | -1.042140987      | -2.0592814              | 0.017963941         | -0.133473998      | -1.096931927            | 0.74056108          | yes      |
| Lrrc26        | -0.971444044      | -1.960802249            | 0.003848454         | -0.10949781       | -1.078852632            | 0.709463707         | yes      |
| Lrrc38        | -0.903285261      | -1.870320174            | 0.00633933          | 0.091743821       | 1.065657491             | 0.754690105         | yes      |
| A330032B11Rik | -0.868251252      | -1.82544886             | 0.003419838         | -0.25069782       | -1.189782464            | 0.337907191         | yes      |
| Zfhx3         | -0.862181774      | -1.817785252            | 0.039478841         | 0.047424614       | 1.033418498             | 0.902507345         | yes      |
| Elf4          | -0.861836542      | -1.817350315            | 0.02838555          | 0.019493988       | 1.013603906             | 0.957294227         | yes      |
| Pim1          | -0.858364134      | -1.812981413            | 0.002715471         | -0.229460384      | -1.172396352            | 0.359447954         | yes      |
| Gas2l2        | -0.833230752      | -1.781670748            | 0.010578015         | -0.06028009       | -1.042668168            | 0.837237608         | yes      |
| Hmmr          | -0.831523028      | -1.779563024            | 0.001861283         | -0.325485155      | -1.25308576             | 0.165973987         | yes      |
| Gm19522       | -0.820873623      | -1.766475357            | 0.012864953         | -0.181449252      | -1.13402249             | 0.545731492         | yes      |
| Fndc8         | -0.797516369      | -1.738106361            | 0.02356772          | -0.119165447      | -1.086106403            | 0.713934981         | yes      |
| Prkd2         | -0.79169896       | -1.73111187             | 0.003595224         | -0.141542595      | -1.103083953            | 0.552135904         | yes      |
| Cenpf         | -0.786416284      | -1.724784699            | 0.030758435         | -0.037201585      | -1.026121514            | 0.912326207         | yes      |
| C920021L13Rik | -0.771945453      | -1.707570866            | 0.042234534         | 0.189037907       | 1.140003226             | 0.596803753         | yes      |
| Adamts15      | -0.758345339      | -1.691549433            | 0.003947203         | -0.257656928      | -1.195535465            | 0.271187686         | yes      |
| Adgrl4        | -0.75752285       | -1.690585346            | 0.000328105         | -0.193573087      | -1.143592518            | 0.263017363         | yes      |
| Adamts6       | -0.737025764      | -1.666736179            | 0.023362888         | -0.038881601      | -1.027317126            | 0.896656142         | yes      |
| St6galnac2    | -0.733841953      | -1.663061999            | 0.017644839         | -0.097067021      | -1.069596775            | 0.731560832         | yes      |
| Nfkb2         | -0.719153459      | -1.646215788            | 0.009995371         | -0.172491638      | -1.12700322             | 0.494663866         | yes      |
| Sdf2l1        | -0.7125632        | -1.638712993            | 0.001197558         | -0.225890331      | -1.16949876             | 0.230314308         | yes      |
| Icam1         | -0.695441702      | -1.619380154            | 0.036296529         | 0.071169342       | 1.050567852             | 0.818374953         | yes      |
| Zbtb40        | -0.692013546      | -1.615536724            | 0.004988962         | -0.223734319      | -1.167752326            | 0.301358995         | yes      |
| Megf10        | -0.687489041      | -1.610478099            | 0.002438207         | -0.135481232      | -1.09845916             | 0.480378179         | yes      |
| 5730559C18Rik | -0.680590814      | -1.602796               | 0.012049682         | -0.096494491      | -1.069172393            | 0.694180148         | yes      |
| Bank1         | -0.665442935      | -1.586055148            | 0.034048215         | -0.031589799      | -1.022137865            | 0.913913539         | yes      |
| Blnk          | -0.621441449      | -1.538411496            | 0.001816217         | -0.259482513      | -1.197049253            | 0.139912738         | yes      |
| Flt1          | -0.618475612      | -1.535252138            | 0.001013797         | -0.179506796      | -1.13249666             | 0.252896379         | yes      |
| Mdga1         | -0.613171634      | -1.529618242            | 0.000390838         | -0.215802229      | -1.161349518            | 0.137278693         | yes      |
| Zfp217        | -0.601524832      | -1.517319424            | 0.023623135         | -0.066979951      | -1.04752157             | 0.784617844         | yes      |
| Gm10658       | -0.594932553      | -1.510401972            | 0.039531825         | 0.051323298       | 1.036214946             | 0.84935564          | yes      |
| Cep76         | -0.593053956      | -1.50843649             | 0.002601643         | -0.213133425      | -1.159203154            | 0.220174983         | yes      |
| Pik3c2b       | -0.54461455       | -1.458630585            | 0.001551663         | -0.071850314      | -1.051063851            | 0.623783195         | yes      |
| Pon2          | -0.526513682      | -1.440444108            | 0.00376161          | -0.199825957      | -1.148559787            | 0.210148174         | yes      |

|               |              |              |             |              |              |             |     |
|---------------|--------------|--------------|-------------|--------------|--------------|-------------|-----|
| D630045J12Rik | -0.512322708 | -1.426344733 | 0.001554162 | -0.185838017 | -1.137477507 | 0.180286708 | yes |
| Cachd1        | -0.50261879  | -1.416782984 | 0.028866374 | 0.00989935   | 1.006885302  | 0.962898999 | yes |
| Mcm4          | -0.502247956 | -1.416418858 | 0.004990877 | 0.009805862  | 1.006820057  | 0.950306878 | yes |
| Mme           | -0.495187168 | -1.409503606 | 0.023869479 | -0.071106281 | -1.050521931 | 0.725246115 | yes |
| Col4a2        | -0.491861306 | -1.406258002 | 0.000251513 | -0.200113138 | -1.148788441 | 0.076299863 | yes |
| Ankdd1b       | -0.488133143 | -1.40262869  | 0.042542254 | 0.233007841  | 1.175282716  | 0.309037763 | yes |
| Itga6         | -0.47346961  | -1.388444596 | 0.008037582 | -0.134450754 | -1.09767484  | 0.400965847 | yes |
| Pvalb         | -0.472882842 | -1.387880008 | 0.002406593 | -0.098013615 | -1.070298799 | 0.467733645 | yes |
| Fgfr2         | -0.471051537 | -1.386119401 | 0.005561295 | -0.108230062 | -1.077905021 | 0.469322135 | yes |
| Lrrc14b       | -0.449231523 | -1.365312805 | 0.001434953 | -0.160260058 | -1.117488557 | 0.190751133 | yes |
| Kif13b        | -0.447583197 | -1.363753781 | 0.005435071 | -0.09871277  | -1.07081761  | 0.490094632 | yes |
| Pvrl1         | -0.441625852 | -1.358134021 | 0.005632311 | -0.134700586 | -1.097864941 | 0.342100876 | yes |
| Eng           | -0.439292183 | -1.355938912 | 0.00322736  | -0.140365411 | -1.102184246 | 0.28676104  | yes |
| Nefh          | -0.432832568 | -1.349881316 | 0.00406597  | -0.157870688 | -1.11563932  | 0.238215214 | yes |
| Sgpp2         | -0.429772127 | -1.347020799 | 0.010221349 | -0.080183507 | -1.057152499 | 0.595559697 | yes |
| Lrp8          | -0.422080573 | -1.33985843  | 0.002808045 | -0.16031999  | -1.11753498  | 0.197110281 | yes |
| Mpp3          | -0.41321226  | -1.331647521 | 0.002423887 | -0.101882288 | -1.073172721 | 0.390113287 | yes |
| Eya1          | -0.412097784 | -1.330619226 | 0.026328452 | -0.029864965 | -1.020916565 | 0.861733112 | yes |
| Itpkb         | -0.407566847 | -1.32644683  | 0.005934935 | -0.005763634 | -1.004003037 | 0.964901032 | yes |
| Olig2         | -0.39747201  | -1.317197803 | 0.01914607  | -0.007266062 | -1.005049155 | 0.96252776  | yes |
| Phka1         | -0.384075152 | -1.305022927 | 0.019876556 | -0.001229789 | -1.000852788 | 0.993490133 | yes |
| Wdfy1         | -0.377366915 | -1.298968922 | 0.014050186 | 0.031364848  | 1.021978501  | 0.820340509 | yes |
| Plxnd1        | -0.375328069 | -1.29713449  | 0.001687297 | -0.090525929 | -1.064758265 | 0.37885803  | yes |
| Sh3pxd2b      | -0.374704875 | -1.296574294 | 0.004497927 | -0.112910975 | -1.08140803  | 0.335883681 | yes |
| Shc3          | -0.374682965 | -1.296554603 | 0.018953276 | -0.054809858 | -1.038722194 | 0.705094353 | yes |
| Pygm          | -0.372616069 | -1.294698407 | 0.013256463 | -0.036035553 | -1.025292504 | 0.791635367 | yes |
| Kcnc3         | -0.363510499 | -1.28655265  | 0.000312396 | -0.12129519  | -1.087710925 | 0.148305352 | yes |
| Gng5          | -0.361987264 | -1.285194992 | 0.011775216 | -0.030952041 | -1.021686118 | 0.811554467 | yes |
| Gm10336       | -0.359581479 | -1.283053634 | 0.034388676 | 0.02615247   | 1.018292811  | 0.868769026 | yes |
| Prkca         | -0.358920398 | -1.28246584  | 0.001142973 | -0.076868435 | -1.054726128 | 0.411779363 | yes |
| Anxa11        | -0.358318557 | -1.281930952 | 0.005117079 | -0.082824644 | -1.059089597 | 0.465945096 | yes |
| Usp31         | -0.352440018 | -1.276718105 | 0.002361915 | -0.11250307  | -1.081102319 | 0.267962685 | yes |
| Arhgap31      | -0.349363548 | -1.273998472 | 0.022589004 | -0.042695889 | -1.030036806 | 0.760559349 | yes |
| Fat3          | -0.342910528 | -1.26831274  | 0.00259487  | -0.093012665 | -1.066595144 | 0.349805484 | yes |
| Rasd2         | -0.339658024 | -1.265456595 | 0.001699513 | -0.063075324 | -1.044690306 | 0.496334266 | yes |
| Cabp1         | -0.339528877 | -1.265343319 | 0.001334549 | -0.084137263 | -1.060053636 | 0.352715456 | yes |
| Igfn1         | -0.338949857 | -1.26483558  | 0.020937428 | 0.028052029  | 1.019634455  | 0.835168393 | yes |
| Klhl29        | -0.33696479  | -1.263096435 | 0.002917143 | -0.072449708 | -1.051500626 | 0.463231174 | yes |
| Hivep2        | -0.333360343 | -1.259944638 | 0.003547895 | -0.103968357 | -1.0747256   | 0.304119826 | yes |
| Unc79         | -0.332246007 | -1.258971834 | 0.002635943 | -0.059570886 | -1.042155737 | 0.534265285 | yes |
| Manf          | -0.330194326 | -1.257182701 | 0.004945523 | -0.114754816 | -1.082791011 | 0.275587658 | yes |
| Arhgef40      | -0.329495554 | -1.25657393  | 0.017650485 | 0.028537461  | 1.019977594  | 0.822099031 | yes |

|               |              |              |             |              |              |             |     |
|---------------|--------------|--------------|-------------|--------------|--------------|-------------|-----|
| Hus1          | -0.325440702 | -1.25304715  | 0.033519125 | -0.002415707 | -1.001675843 | 0.986465117 | yes |
| Cacng2        | -0.316839195 | -1.245598571 | 0.006571596 | -0.05230909  | -1.036923233 | 0.614327804 | yes |
| Plec          | -0.314430032 | -1.243520276 | 0.006252312 | -0.087739846 | -1.062704025 | 0.394003456 | yes |
| Sipa1l1       | -0.309205976 | -1.239025583 | 0.002746367 | -0.109739078 | -1.079033068 | 0.228901603 | yes |
| Phtf1         | -0.307609167 | -1.237654958 | 0.004699608 | -0.041389437 | -1.029104464 | 0.665735121 | yes |
| Ncor2         | -0.305762593 | -1.236071839 | 0.003811518 | -0.092750878 | -1.066401621 | 0.321788682 | yes |
| Zdhhc14       | -0.303429075 | -1.234074143 | 0.024045384 | 0.026691814  | 1.018673566  | 0.829486044 | yes |
| Pknox1        | -0.302824315 | -1.233556944 | 0.031127875 | 0.071989962  | 1.051165595  | 0.582718287 | yes |
| Ssh3          | -0.299508416 | -1.230724985 | 0.017202735 | -0.058708172 | -1.041532727 | 0.610323493 | yes |
| Gpc5          | -0.299057896 | -1.230340718 | 0.02532466  | -0.02442196  | -1.017072103 | 0.843136197 | yes |
| Ppp1r16b      | -0.297742682 | -1.229219605 | 0.00500573  | -0.096434684 | -1.069128071 | 0.309251755 | yes |
| Hip1          | -0.292252375 | -1.224550588 | 0.013810956 | -0.049441273 | -1.034864064 | 0.647062134 | yes |
| Kcnip2        | -0.290653066 | -1.223193857 | 0.008456357 | -0.028499432 | -1.019950708 | 0.772929308 | yes |
| Cdh22         | -0.290233216 | -1.222837937 | 0.012296802 | -0.008923849 | -1.006204711 | 0.932125846 | yes |
| Plcl1         | -0.28992928  | -1.222580346 | 0.021610006 | -0.034883829 | -1.024474326 | 0.763840707 | yes |
| Nwd1          | -0.289666042 | -1.222357291 | 0.026560005 | -0.020388472 | -1.014232543 | 0.865221916 | yes |
| Fam84a        | -0.286695574 | -1.219843081 | 0.003182388 | -0.080938794 | -1.05770609  | 0.34385935  | yes |
| Pou3f2        | -0.286393192 | -1.219587435 | 0.008011587 | -0.063898709 | -1.045286709 | 0.510169899 | yes |
| Zfpm1         | -0.281449746 | -1.215415627 | 0.008390224 | -0.002989005 | -1.002073968 | 0.975005244 | yes |
| 9430015G10Rik | -0.275310566 | -1.21025459  | 0.034367852 | -0.021621638 | -1.015099846 | 0.858392453 | yes |
| Rasa3         | -0.272425624 | -1.207836875 | 0.011800756 | -0.001894411 | -1.001313968 | 0.984522082 | yes |
| Ankrd63       | -0.272392551 | -1.207809187 | 2.50E-02    | -0.032387494 | -1.022703182 | 0.773000435 | yes |
| Osgin2        | -0.265105373 | -1.201723819 | 0.031854393 | 0.006179362  | 1.004292394  | 0.957048944 | yes |
| Tspan12       | -0.264281658 | -1.201037884 | 0.038887308 | -0.008339814 | -1.005797459 | 0.944373159 | yes |
| Nlrp3         | -1.047799073 | -2.067373525 | 0.029386382 | -0.243796955 | -1.184104949 | 0.586189788 | yes |
| Runx1         | -0.962826635 | -1.949125027 | 0.045881779 | -0.184031752 | -1.136054268 | 0.685002675 | yes |
| Slc25a13      | -0.932712313 | -1.908861346 | 0.011607286 | -0.369467965 | -1.291876327 | 0.276710338 | yes |
| Rad54b        | -0.899913044 | -1.865953512 | 0.044426019 | -0.29338489  | -1.225512237 | 0.487836686 | yes |
| Vav3          | -0.885497038 | -1.847400979 | 0.014147796 | -0.374059314 | -1.295994247 | 0.257940288 | yes |
| E330020D12Rik | -0.88051123  | -1.841027568 | 0.0239304   | -0.310767189 | -1.24036712  | 0.392447187 | yes |
| 1810009A15Rik | -0.873724999 | -1.832387973 | 0.025562828 | -0.132315557 | -1.096051476 | 0.714705415 | yes |
| Jph2          | -0.847085718 | -1.798863501 | 0.029994343 | -0.115977895 | -1.083709362 | 0.749028912 | yes |
| Gm20219       | -0.83022059  | -1.777957194 | 0.030640497 | -0.306298494 | -1.236531073 | 0.395394507 | yes |
| Kif4          | -0.8019697   | -1.743479862 | 0.02366318  | -0.19772656  | -1.146889629 | 0.54702616  | yes |
| Ska3          | -0.797046387 | -1.737540236 | 0.010542148 | -0.29705702  | -1.228635539 | 0.297576503 | yes |
| Irf7          | -0.792319934 | -1.731857147 | 0.014048279 | -0.185763473 | -1.137418735 | 0.528197637 | yes |
| Sbk3          | -0.790364973 | -1.729511939 | 0.033340227 | -0.227535078 | -1.170832809 | 0.512922805 | yes |
| Tmem210       | -0.787544115 | -1.72613358  | 0.046708368 | -0.156582301 | -1.114643453 | 0.674426843 | yes |
| Psg23         | -0.782478374 | -1.720083229 | 0.04905449  | -0.217822288 | -1.162976777 | 0.562071549 | yes |
| Greb1         | -0.779837537 | -1.716937517 | 0.025588759 | -0.263028176 | -1.199994818 | 0.419451595 | yes |
| Nusap1        | -0.769628605 | -1.70483085  | 0.027132285 | -0.135146601 | -1.098204404 | 0.675594657 | yes |
| Pqlc3         | -0.764887515 | -1.699237506 | 0.013092076 | -0.361213715 | -1.284506076 | 0.20690738  | yes |

|               |              |              |             |              |              |             |     |
|---------------|--------------|--------------|-------------|--------------|--------------|-------------|-----|
| Bag3          | -0.735106185 | -1.664519977 | 0.021113483 | -0.265758453 | -1.202267939 | 0.367654299 | yes |
| Gm14827       | -0.718577232 | -1.645558405 | 0.033866254 | -0.359184597 | -1.282700717 | 0.25950183  | yes |
| Tbc1d2        | -0.715712589 | -1.642294194 | 0.004309248 | -0.276327662 | -1.211108117 | 0.219031832 | yes |
| 9530052E02Rik | -0.712079531 | -1.638163699 | 0.021767178 | -0.280777238 | -1.214849196 | 0.331977762 | yes |
| Fam60a        | -0.707841183 | -1.633358166 | 0.044528824 | -0.37566773  | -1.297439917 | 0.264747995 | yes |
| Bfsp2         | -0.702266408 | -1.627058821 | 0.022109161 | -0.190454596 | -1.14112323  | 0.501291378 | yes |
| Adgrg6        | -0.695270914 | -1.619188461 | 0.004730527 | -0.349191877 | -1.273846884 | 0.1199498   | yes |
| Stc1          | -0.684270947 | -1.606889749 | 0.045118099 | -0.23013501  | -1.17294471  | 0.475988276 | yes |
| Stac3         | -0.674504946 | -1.596049002 | 0.020218184 | -0.142789556 | -1.104037791 | 0.593489182 | yes |
| Gpr63         | -0.672974186 | -1.594356425 | 0.041749596 | -0.374635875 | -1.296512284 | 0.235948939 | yes |
| Tbc1d4        | -0.672240957 | -1.593546322 | 0.025545245 | -0.307330759 | -1.237416142 | 0.274127106 | yes |
| Kif23         | -0.6628973   | -1.583259022 | 0.045656592 | -0.088323105 | -1.063133746 | 0.776813239 | yes |
| Tmem181a      | -0.661178017 | -1.58137335  | 0.009551363 | -0.358867979 | -1.282419243 | 0.116171901 | yes |
| AA986860      | -0.659096016 | -1.579092863 | 0.026011598 | -0.287043545 | -1.220137337 | 0.301943045 | yes |
| Polq          | -0.652755596 | -1.572168223 | 0.014914022 | -0.27533629  | -1.21027617  | 0.267759938 | yes |
| Slc39a2       | -0.652184003 | -1.571545457 | 0.031269055 | -0.332825486 | -1.25947762  | 0.243625043 | yes |
| Pcdhgb2       | -0.625694361 | -1.542953262 | 0.00634785  | -0.204812568 | -1.152536602 | 0.320790032 | yes |
| Acer2         | -0.624022189 | -1.54116592  | 0.01185421  | -0.226111121 | -1.169677753 | 0.319978941 | yes |
| Tmem86b       | -0.621875455 | -1.538874366 | 0.019028895 | -0.177010786 | -1.130539019 | 0.469505351 | yes |
| Col11a1       | -0.620833668 | -1.537763528 | 0.027739773 | -0.134497768 | -1.097710611 | 0.607706079 | yes |
| Sh3bp1        | -0.615882477 | -1.532495117 | 0.002352303 | -0.256940338 | -1.194941788 | 0.15276646  | yes |
| Erbp3         | -0.613277525 | -1.529730517 | 0.043871868 | -0.237235392 | -1.178731715 | 0.407251532 | yes |
| Grk4          | -0.610388577 | -1.526670349 | 0.038984154 | -0.299127325 | -1.230399929 | 0.281778796 | yes |
| Egfl8         | -0.603976263 | -1.519899849 | 0.049330002 | -0.110937903 | -1.079930076 | 0.701600953 | yes |
| Prkg2         | -0.603619458 | -1.519523996 | 0.027147838 | -0.218616864 | -1.163617472 | 0.38380082  | yes |
| Abcc9         | -0.602315309 | -1.518151017 | 0.020122158 | -0.123833213 | -1.089626135 | 0.602445532 | yes |
| Cfp           | -0.601741723 | -1.517547551 | 0.005807347 | -0.314083702 | -1.243221796 | 0.117055081 | yes |
| Lonrf3        | -0.59635383  | -1.511890683 | 0.031641834 | -0.117783158 | -1.085066271 | 0.640028886 | yes |
| Paqr5         | -0.592379246 | -1.5077312   | 0.032745351 | -0.246193765 | -1.186073788 | 0.346488356 | yes |
| Onecut2       | -0.57790406  | -1.492679116 | 0.043966449 | -0.348186751 | -1.272959704 | 0.206657171 | yes |
| Card10        | -0.576520023 | -1.491247814 | 0.019246901 | -0.333476104 | -1.260045739 | 0.152263598 | yes |
| Lrrc1         | -0.573649204 | -1.48828333  | 0.03658407  | -0.220351834 | -1.165017668 | 0.394553849 | yes |
| Cdh24         | -0.564351914 | -1.47872309  | 0.012655415 | -0.294359652 | -1.226340539 | 0.163038053 | yes |
| Tlr13         | -0.560647609 | -1.474931148 | 0.046309957 | -0.068361874 | -1.048525447 | 0.795944629 | yes |
| Il1r1         | -0.557730482 | -1.471951853 | 0.025787968 | -0.252644071 | -1.19138861  | 0.282787813 | yes |
| Serpib8       | -0.546889443 | -1.46093242  | 0.013367054 | -0.288977298 | -1.221773876 | 0.161797578 | yes |
| Kcng4         | -0.529281097 | -1.443209857 | 0.029128692 | -0.285097312 | -1.21849245  | 0.215674584 | yes |
| Arc           | -0.528653267 | -1.44258194  | 0.016827728 | -0.367560342 | -1.290169255 | 0.074820018 | yes |
| Pp2d1         | -0.526558301 | -1.440488657 | 0.021647341 | -0.206375909 | -1.153786196 | 0.333210803 | yes |
| Aldh1a1       | -0.525452676 | -1.439385146 | 0.00348305  | -0.20580927  | -1.153333119 | 0.199891931 | yes |
| Rrp1b         | -0.525023672 | -1.438957191 | 0.024749017 | -0.252686381 | -1.19142355  | 0.249756636 | yes |
| Rmi2          | -0.524496811 | -1.43843179  | 0.029910406 | -0.203921264 | -1.151824779 | 0.368666126 | yes |

|               |              |              |             |              |              |             |     |
|---------------|--------------|--------------|-------------|--------------|--------------|-------------|-----|
| Rasd1         | -0.523735197 | -1.437672628 | 0.035719482 | -0.226886741 | -1.170306763 | 0.335932259 | yes |
| Cyp26b1       | -0.5216991   | -1.435645049 | 0.014333716 | -0.150926652 | -1.110282385 | 0.439452017 | yes |
| Pnpla3        | -0.51813419  | -1.43210194  | 0.006235893 | -0.295133774 | -1.226998746 | 0.092555317 | yes |
| Oxtr          | -0.515255245 | -1.429246983 | 0.014696241 | -0.203259247 | -1.151296356 | 0.297632831 | yes |
| Dio2          | -0.513612889 | -1.427620862 | 0.018960726 | -0.178114379 | -1.131404159 | 0.357730314 | yes |
| Fndc3b        | -0.50915008  | -1.423211506 | 0.003546092 | -0.25438757  | -1.192829274 | 0.108095882 | yes |
| Nos3          | -0.507491319 | -1.421576088 | 0.009888233 | -0.219356351 | -1.164214064 | 0.224984749 | yes |
| Cxcr2         | -0.499019361 | -1.413252609 | 0.046195312 | -0.054604206 | -1.038574138 | 0.816343178 | yes |
| Aoc2          | -0.494047459 | -1.408390556 | 0.039556152 | -0.142276716 | -1.103645404 | 0.528436224 | yes |
| Al414108      | -0.492167734 | -1.406556723 | 0.007838142 | -0.259262243 | -1.196866502 | 0.122211875 | yes |
| Cys1          | -0.488191103 | -1.402685042 | 0.03977813  | -0.342945054 | -1.268343093 | 0.135538708 | yes |
| F730043M19Rik | -0.487825309 | -1.402329437 | 0.049371881 | -0.262231204 | -1.199332102 | 0.27029382  | yes |
| Osbp3         | -0.48775825  | -1.402264256 | 0.005169208 | -0.224242454 | -1.168163696 | 0.153243332 | yes |
| Faap100       | -0.485641367 | -1.400208206 | 0.008842863 | -0.16468611  | -1.12092217  | 0.328412183 | yes |
| Col15a1       | -0.483857289 | -1.398477739 | 0.04720866  | -0.195662542 | -1.145249983 | 0.39809728  | yes |
| Mirg          | -0.480644249 | -1.395366641 | 0.026100276 | -0.320434832 | -1.248706855 | 0.121127995 | yes |
| Pfkfb3        | -0.479187658 | -1.393958545 | 0.005624211 | -0.246018805 | -1.185929957 | 0.117370618 | yes |
| Cobll1        | -0.476941586 | -1.391790038 | 0.034793246 | -0.108337273 | -1.077985127 | 0.608091951 | yes |
| Homer1        | -0.473185673 | -1.388171364 | 0.042254061 | -0.258998879 | -1.196648034 | 0.229776257 | yes |
| Gfod1         | -0.472958182 | -1.387952487 | 0.003218064 | -0.247013518 | -1.186747917 | 0.085278348 | yes |
| Luzp1         | -0.466341908 | -1.381601839 | 0.004902437 | -0.253617857 | -1.192193041 | 0.091329827 | yes |
| Egr3          | -0.464719573 | -1.380049077 | 0.037571932 | -0.259170442 | -1.196790345 | 0.210891439 | yes |
| Abcc4         | -0.463927951 | -1.379292038 | 0.02049145  | -0.246770333 | -1.186547893 | 0.190890867 | yes |
| Ovca2         | -0.462464798 | -1.377893895 | 0.024718715 | -0.085249525 | -1.060871212 | 0.652926695 | yes |
| Snrnp48       | -0.460171847 | -1.375705676 | 0.029287564 | -0.153767051 | -1.112470477 | 0.436069075 | yes |
| Fbxo32        | -0.45823554  | -1.373860517 | 0.018039647 | -0.244433596 | -1.184627593 | 0.179315068 | yes |
| Gm8234        | -0.45707467  | -1.372755479 | 0.049536504 | -0.139242684 | -1.101326843 | 0.527178325 | yes |
| Cep95         | -0.454419757 | -1.370231595 | 0.024893015 | -0.134567869 | -1.097763951 | 0.474982787 | yes |
| Adam19        | -0.451760467 | -1.367708202 | 0.005827501 | -0.18316918  | -1.135375236 | 0.214651993 | yes |
| Trpm3         | -0.448572295 | -1.364689078 | 0.028452191 | -0.134789597 | -1.097932679 | 0.475554267 | yes |
| Rasgrp3       | -0.448257532 | -1.364391367 | 0.034512858 | -0.219765721 | -1.164544461 | 0.273395841 | yes |
| Slnf5         | -0.447778039 | -1.363937975 | 0.02429174  | -0.140212156 | -1.102067169 | 0.44825298  | yes |
| D930015E06Rik | -0.445503744 | -1.361789528 | 0.010537125 | -0.24326018  | -1.183664468 | 0.134058177 | yes |
| Robo4         | -0.443224204 | -1.359639522 | 0.037303206 | -0.172284453 | -1.126841384 | 0.391080454 | yes |
| Lsm11         | -0.442514756 | -1.358971081 | 0.009246422 | -0.173004847 | -1.1274042   | 0.259749051 | yes |
| Fmn1          | -0.432218014 | -1.34930642  | 0.006043282 | -0.203532713 | -1.151514608 | 0.150937899 | yes |
| Zswim6        | -0.429098009 | -1.346391533 | 0.020406205 | -0.221191493 | -1.165695914 | 0.200674129 | yes |
| Gmip          | -0.427672334 | -1.345061682 | 0.018608852 | -0.251174361 | -1.190175529 | 0.144070332 | yes |
| Scrt2         | -0.4264494   | -1.343921992 | 0.027287818 | -0.239450155 | -1.180542643 | 0.191999397 | yes |
| Per2          | -0.425678206 | -1.34320379  | 0.008319344 | -0.227168498 | -1.170535345 | 0.125680889 | yes |
| Mtm1          | -0.425280414 | -1.342833481 | 0.047142067 | -0.179056847 | -1.132143512 | 0.379238656 | yes |
| Pde7b         | -0.425230662 | -1.342787174 | 0.027325773 | -0.05749169  | -1.040654875 | 0.745714631 | yes |

|               |              |              |             |              |              |             |     |
|---------------|--------------|--------------|-------------|--------------|--------------|-------------|-----|
| Plekha2       | -0.423841824 | -1.341495136 | 0.009787461 | -0.206858725 | -1.154172391 | 0.172592595 | yes |
| Cntn2         | -0.419626977 | -1.337581666 | 0.008738805 | -0.195753556 | -1.145322235 | 0.17761572  | yes |
| Sfi1          | -0.418512016 | -1.336548339 | 0.032450608 | -0.283708426 | -1.217319969 | 0.129192964 | yes |
| Fmn1          | -0.418391564 | -1.336436754 | 0.04419802  | -0.351689393 | -1.276054009 | 0.084489147 | yes |
| Ccdc134       | -0.415562024 | -1.333818185 | 0.041504212 | -0.311156457 | -1.240701842 | 0.11670463  | yes |
| Steap2        | -0.413238888 | -1.3316721   | 0.019682673 | -0.241427812 | -1.182162049 | 0.150056847 | yes |
| Gm11549       | -0.412866455 | -1.331328371 | 0.022690073 | -0.234573842 | -1.176559141 | 0.168245504 | yes |
| Pisd-ps2      | -0.411678089 | -1.330232191 | 0.020885835 | -0.309306351 | -1.239111791 | 0.071722113 | yes |
| lqck          | -0.411230755 | -1.329819793 | 0.028081395 | -0.111251113 | -1.080164555 | 0.522640652 | yes |
| Cfap69        | -0.409918275 | -1.32861055  | 0.007742406 | -0.172618942 | -1.127102672 | 0.219225738 | yes |
| Hspa5         | -0.402897728 | -1.322160874 | 0.006596357 | -0.158064001 | -1.11578882  | 0.233543156 | yes |
| Htr7          | -0.40125434  | -1.320655645 | 0.029014205 | -0.049942471 | -1.035223643 | 0.769565652 | yes |
| Fat1          | -0.401194045 | -1.320600452 | 0.029435205 | -0.102179543 | -1.073393862 | 0.544131776 | yes |
| 3300002P13Rik | -0.399434475 | -1.318990776 | 0.044676475 | -0.181167927 | -1.133801378 | 0.335541327 | yes |
| Kdm7a         | -0.396334885 | -1.316160003 | 0.026398669 | -0.251890691 | -1.190766625 | 0.135681814 | yes |
| lqcg          | -0.39303162  | -1.313149906 | 0.046468603 | -0.084136082 | -1.060052768 | 0.650210201 | yes |
| Apln          | -0.392348856 | -1.312528597 | 0.013684515 | -0.120100871 | -1.086810848 | 0.408155816 | yes |
| Kmt2a         | -0.391805953 | -1.31203477  | 0.014623877 | -0.193634666 | -1.143641332 | 0.188644509 | yes |
| Runx2         | -0.391573829 | -1.311823686 | 0.01955424  | -0.250976211 | -1.190012074 | 0.116184738 | yes |
| Spred1        | -0.391257327 | -1.311535926 | 0.00704886  | -0.169531178 | -1.124692942 | 0.195125535 | yes |
| Ago3          | -0.389601804 | -1.310031775 | 0.020653648 | -0.138818287 | -1.101002914 | 0.373034283 | yes |
| Ccdc117       | -0.38892196  | -1.309414591 | 0.031859963 | -0.222493662 | -1.16674854  | 0.196574028 | yes |
| Mdn1          | -0.386309743 | -1.307045843 | 0.022059608 | -0.168368342 | -1.123786787 | 0.278913942 | yes |
| Myh9          | -0.384446309 | -1.305358708 | 0.003635753 | -0.190480066 | -1.141143376 | 0.110517864 | yes |
| Star          | -0.382792786 | -1.303863448 | 0.049777807 | -0.089288743 | -1.063845571 | 0.627795558 | yes |
| Pop1          | -0.38265986  | -1.303743319 | 0.043884972 | -0.055585279 | -1.039280637 | 0.755130546 | yes |
| Kdr           | -0.382527163 | -1.303623408 | 0.021264747 | -0.154931866 | -1.113369036 | 0.31727077  | yes |
| Irs2          | -0.379863288 | -1.301218544 | 0.010211112 | -0.109055058 | -1.078521591 | 0.415328102 | yes |
| Mir124a-1hg   | -0.378747022 | -1.300212133 | 0.03113707  | -0.27471661  | -1.209756432 | 0.102240451 | yes |
| Ccdc88c       | -0.378710219 | -1.300178965 | 0.008083811 | -0.186968956 | -1.138369533 | 0.155842916 | yes |
| Trip11        | -0.378617074 | -1.300095025 | 0.013427853 | -0.146200456 | -1.106651107 | 0.299730104 | yes |
| Rnft1         | -0.373901945 | -1.295852888 | 0.02013993  | -0.124495901 | -1.09012676  | 0.40385519  | yes |
| Cdr2          | -0.373700538 | -1.295671994 | 0.013051031 | -0.152124006 | -1.111204237 | 0.27336219  | yes |
| Nipbl         | -0.373228107 | -1.295247776 | 0.034985409 | -0.106694969 | -1.076758692 | 0.51377503  | yes |
| Igf1r         | -0.370966828 | -1.293219197 | 0.028587988 | -0.159088018 | -1.116581082 | 0.311729821 | yes |
| Mxd3          | -0.369103561 | -1.291550058 | 0.029634277 | -0.155918    | -1.114130324 | 0.328867583 | yes |
| Nav2          | -0.367958916 | -1.290525739 | 0.005777077 | -0.199968863 | -1.148673563 | 0.102916326 | yes |
| Etv4          | -0.367582167 | -1.290188772 | 0.023354342 | -0.159125119 | -1.116609797 | 0.294680434 | yes |
| Zfp141        | -0.365932272 | -1.28871413  | 0.045042661 | -0.177320114 | -1.130781444 | 0.308153247 | yes |
| Clgn          | -0.365552112 | -1.28837459  | 0.040597044 | -0.107251025 | -1.077173786 | 0.523256173 | yes |
| Chuk          | -0.365225552 | -1.288082994 | 0.025729946 | -0.243291417 | -1.183690097 | 0.119965901 | yes |
| Maml3         | -0.36306015  | -1.286151105 | 0.041135571 | -0.157863257 | -1.115633574 | 0.349168926 | yes |

|         |              |              |             |              |              |             |     |
|---------|--------------|--------------|-------------|--------------|--------------|-------------|-----|
| Bcor    | -0.361667884 | -1.28491051  | 0.012439271 | -0.208515355 | -1.155498474 | 0.124384709 | yes |
| Fam53b  | -0.360877829 | -1.284207054 | 0.023314407 | -0.272105803 | -1.207569147 | 0.076337112 | yes |
| Egln3   | -0.360768035 | -1.284109326 | 0.042695638 | -0.210780139 | -1.157313834 | 0.217048896 | yes |
| Lyst    | -0.359671958 | -1.283134104 | 0.008481039 | -0.122172099 | -1.088372266 | 0.323239631 | yes |
| Kmt2c   | -0.359620193 | -1.283088065 | 0.01899435  | -0.187315407 | -1.138642936 | 0.189504686 | yes |
| Pecam1  | -0.356656744 | -1.28045517  | 0.009647174 | -0.101087768 | -1.072581866 | 0.418361007 | yes |
| P4ha1   | -0.355534978 | -1.27945994  | 0.046157548 | -0.271965268 | -1.207451523 | 0.115446297 | yes |
| Zfp397  | -0.355385584 | -1.279327457 | 0.031613663 | -0.201158758 | -1.149621348 | 0.199149583 | yes |
| Ccdc141 | -0.354322484 | -1.278385088 | 0.036907666 | -0.270165421 | -1.205946095 | 0.102019914 | yes |
| Eml5    | -0.352449783 | -1.276726746 | 0.007783031 | -0.197074309 | -1.146371231 | 0.107827299 | yes |
| Nme7    | -0.352067261 | -1.276388275 | 0.035773952 | -0.145603216 | -1.106193076 | 0.350293238 | yes |
| Dusp4   | -0.352029341 | -1.276354727 | 0.033669544 | -0.172169816 | -1.126751848 | 0.273195213 | yes |
| Lrrk2   | -0.351729497 | -1.276089482 | 0.022443757 | -0.173997243 | -1.128179981 | 0.226472676 | yes |
| Raver2  | -0.349836541 | -1.274416226 | 0.029097363 | -0.183110807 | -1.135329298 | 0.228232873 | yes |
| Chfr    | -0.348185554 | -1.272958648 | 0.011800234 | -0.188368923 | -1.139474724 | 0.144465178 | yes |
| Hipk3   | -0.343689056 | -1.26899735  | 0.015893774 | -0.099991701 | -1.071767297 | 0.440741159 | yes |
| Sos1    | -0.343652328 | -1.268965044 | 0.01338424  | -0.175733456 | -1.129538508 | 0.173864385 | yes |
| Trim59  | -0.342611263 | -1.268049675 | 0.047341745 | -0.110069319 | -1.079280093 | 0.500538867 | yes |
| Nktr    | -0.341441093 | -1.267021576 | 0.021868194 | -0.182613209 | -1.134937781 | 0.18997411  | yes |
| Sbk1    | -0.339970526 | -1.265730735 | 0.003781226 | -0.192042042 | -1.142379537 | 0.074542101 | yes |
| Zfp937  | -0.339665478 | -1.265463133 | 0.029554594 | -0.095877529 | -1.068715264 | 0.510415563 | yes |
| Lamc2   | -0.339324287 | -1.265163892 | 0.049457077 | -0.123553206 | -1.089414675 | 0.45081178  | yes |
| Ptchd2  | -0.337533534 | -1.263594475 | 0.008616637 | -0.106951286 | -1.076950011 | 0.358304497 | yes |
| Mast4   | -0.337068413 | -1.263187161 | 0.025048634 | -0.20714585  | -1.154402116 | 0.147014652 | yes |
| Lipa    | -0.336527163 | -1.262713345 | 0.02196005  | -0.066829043 | -1.047412003 | 0.621908781 | yes |
| Fam166a | -0.336352597 | -1.262560566 | 0.017442881 | -0.119037515 | -1.086010096 | 0.363034143 | yes |
| Sirt1   | -0.334590785 | -1.261019675 | 0.039371522 | -0.059753732 | -1.042287827 | 0.694435213 | yes |
| Slc4a7  | -0.334005729 | -1.260508397 | 0.038785121 | -0.177075536 | -1.130589761 | 0.249573803 | yes |
| Arl15   | -0.332792275 | -1.259448626 | 0.003766414 | -0.146516429 | -1.106893507 | 0.156460172 | yes |
| Numb    | -0.332733222 | -1.259397075 | 0.006063197 | -0.153891035 | -1.112566086 | 0.164114089 | yes |
| Pcgf6   | -0.332633117 | -1.259309692 | 0.047836178 | -0.128527804 | -1.0931776   | 0.420419366 | yes |
| Jak2    | -0.331543858 | -1.25835925  | 0.01010447  | -0.121684359 | -1.088004376 | 0.301438464 | yes |
| Chd9    | -0.331284948 | -1.258133442 | 0.005200408 | -0.139890125 | -1.101821199 | 0.192101456 | yes |
| Zc3h11a | -0.328784597 | -1.255954845 | 0.016268127 | -0.156881861 | -1.114874921 | 0.216454899 | yes |
| Gatm    | -0.328723365 | -1.25590154  | 0.040884821 | -0.131476908 | -1.095414519 | 0.383255527 | yes |
| Sgsm1   | -0.328686555 | -1.255869497 | 0.013646842 | -0.147313993 | -1.1075056   | 0.230132623 | yes |
| Vamp1   | -0.327923665 | -1.255205574 | 0.012736802 | -0.146725786 | -1.107054146 | 0.226826343 | yes |
| Otub2   | -0.327694438 | -1.255006154 | 0.014552209 | -0.134542692 | -1.097744794 | 0.277987035 | yes |
| Slco1c1 | -0.327513733 | -1.254848967 | 0.018843688 | -0.074784975 | -1.05320405  | 0.557781422 | yes |
| Rps6ka3 | -0.32541973  | -1.253028936 | 0.00300388  | -0.143064156 | -1.104247951 | 0.145148889 | yes |
| Ascc2   | -0.324645578 | -1.252356739 | 0.049033279 | -0.169539398 | -1.12469935  | 0.282902078 | yes |
| Abca7   | -0.32375286  | -1.251582039 | 0.004970194 | -0.160670923 | -1.117806852 | 0.126600908 | yes |

|               |              |              |             |              |              |             |     |
|---------------|--------------|--------------|-------------|--------------|--------------|-------------|-----|
| Sipa1l3       | -0.323041221 | -1.250964822 | 0.01774172  | -0.106627973 | -1.07670869  | 0.395685723 | yes |
| Zmynd8        | -0.320502772 | -1.248765662 | 0.00517239  | -0.207763179 | -1.15489619  | 0.052532464 | yes |
| Jade2         | -0.31939881  | -1.247810461 | 0.010346773 | -0.191179421 | -1.141696685 | 0.101498755 | yes |
| Bdp1          | -0.318924855 | -1.247400597 | 0.013880995 | -0.132468347 | -1.096167561 | 0.269017254 | yes |
| Map3k2        | -0.3182591   | -1.246825097 | 0.044764575 | -0.117740168 | -1.085033938 | 0.431160658 | yes |
| Zc3h3         | -0.318251053 | -1.246818142 | 0.017555274 | -0.143011411 | -1.104207581 | 0.252296228 | yes |
| Cdk13         | -0.317813002 | -1.246439624 | 0.011812711 | -0.147721301 | -1.10781832  | 0.206155588 | yes |
| Epb4.1        | -0.317750647 | -1.246385753 | 0.030223943 | -0.221815497 | -1.166200217 | 0.116708631 | yes |
| Zfhx2         | -0.317717493 | -1.24635711  | 0.012392247 | -0.167397436 | -1.123030754 | 0.157439321 | yes |
| Dnajc3        | -0.317183586 | -1.245895949 | 0.027664531 | -0.140594259 | -1.102359094 | 0.297049854 | yes |
| Ccnd1         | -0.316469883 | -1.245279755 | 0.009228839 | -0.096773974 | -1.069379536 | 0.380042036 | yes |
| Slc7a6        | -0.315504194 | -1.244446487 | 0.014422042 | -0.112931846 | -1.081423675 | 0.341649105 | yes |
| Tet3          | -0.315396857 | -1.244353903 | 0.038247917 | -0.259130054 | -1.196756842 | 0.081281456 | yes |
| Stard8        | -0.314992254 | -1.244004974 | 0.024300026 | -0.087634761 | -1.062626621 | 0.499181943 | yes |
| Gpr17         | -0.314575405 | -1.243645586 | 0.039632212 | -0.104385488 | -1.075036384 | 0.464424563 | yes |
| Ssh2          | -0.314443238 | -1.243531659 | 0.02423383  | -0.101346137 | -1.07277397  | 0.433531389 | yes |
| Utrn          | -0.314352869 | -1.243453769 | 0.010341508 | -0.093822953 | -1.067194364 | 0.399340401 | yes |
| Mcf2l         | -0.313773212 | -1.242954264 | 0.017549388 | -0.123787672 | -1.08959174  | 0.309487095 | yes |
| Kcnj10        | -0.313107233 | -1.242380622 | 0.024821234 | -0.050543383 | -1.035654924 | 0.692085556 | yes |
| Bmp2k         | -0.312628022 | -1.241968017 | 0.039593709 | -0.120109912 | -1.086817659 | 0.402692476 | yes |
| Myo9b         | -0.31222846  | -1.241624095 | 0.025491819 | -0.151781943 | -1.110940802 | 0.24748781  | yes |
| Zfp462        | -0.312027316 | -1.241450997 | 0.019154537 | -0.129394479 | -1.093834506 | 0.296644802 | yes |
| Krit1         | -0.311806757 | -1.241261219 | 0.022053429 | -0.177118877 | -1.130623726 | 0.16908821  | yes |
| Col4a1        | -0.311161291 | -1.240705999 | 0.044998376 | -0.203385161 | -1.151396843 | 0.172987516 | yes |
| Vwa1          | -0.310978027 | -1.240548404 | 0.02131665  | -0.107726024 | -1.077528497 | 0.39060697  | yes |
| Slc24a5       | -0.309824035 | -1.239556502 | 0.040486031 | -0.254785678 | -1.193158478 | 0.085548777 | yes |
| Kcna1         | -0.309671619 | -1.239425555 | 0.008138963 | -0.17221886  | -1.126790152 | 0.112853575 | yes |
| Vcam1         | -0.309585413 | -1.239351497 | 0.047992802 | -0.04443941  | -1.031282375 | 0.761958956 | yes |
| Sfpq          | -0.309376841 | -1.239172335 | 0.01283162  | -0.150121073 | -1.109662593 | 0.192310333 | yes |
| Plcx2         | -0.308741473 | -1.23862672  | 0.049815119 | -0.168574037 | -1.123947024 | 0.259872752 | yes |
| Pde7a         | -0.308277525 | -1.23822846  | 0.011602581 | -0.129469984 | -1.093891754 | 0.249834978 | yes |
| Zbtb44        | -0.307553182 | -1.237606931 | 0.047025244 | -0.04571619  | -1.03219546  | 0.753076659 | yes |
| Rnf165        | -0.307284394 | -1.237376374 | 0.009313379 | -0.146999562 | -1.107264248 | 0.177460777 | yes |
| D930016D06Rik | -0.306666144 | -1.236846225 | 0.043539052 | -0.114260669 | -1.082420201 | 0.426754791 | yes |
| Usp35         | -0.305969135 | -1.236248813 | 0.014432184 | -0.137457114 | -1.099964615 | 0.236424434 | yes |
| Grin2c        | -0.305739417 | -1.236051982 | 0.026151417 | -0.118727104 | -1.085776454 | 0.354667889 | yes |
| Ikzf5         | -0.305281802 | -1.235659975 | 0.023603161 | -0.156759911 | -1.114780685 | 0.21788796  | yes |
| Ppp1r3c       | -0.303516841 | -1.234149221 | 0.045552277 | -0.097426941 | -1.069863649 | 0.494781579 | yes |
| Rfx7          | -0.302902349 | -1.233623667 | 0.026016389 | -0.04160016  | -1.029254788 | 0.740780573 | yes |
| Gm17066       | -0.302799552 | -1.233535771 | 0.042444385 | -0.152423007 | -1.11143456  | 0.283858955 | yes |
| Itpr1         | -0.302604024 | -1.233368601 | 0.007639801 | -0.118984825 | -1.085970433 | 0.248962123 | yes |
| Slco2b1       | -0.302525274 | -1.233301279 | 0.021370385 | -0.082961231 | -1.059189871 | 0.495105201 | yes |



|               |              |              |             |              |              |             |     |
|---------------|--------------|--------------|-------------|--------------|--------------|-------------|-----|
| Mapk11        | -0.302286966 | -1.233097576 | 0.007057894 | -0.166589135 | -1.122401728 | 0.108793834 | yes |
| Wipf3         | -0.301839833 | -1.232715463 | 0.017840882 | -0.098981753 | -1.071017277 | 0.398581606 | yes |
| Coro6         | -0.301615728 | -1.23252399  | 0.039191564 | -0.223425575 | -1.167502448 | 0.115888045 | yes |
| Tacc1         | -0.300894578 | -1.231908051 | 0.00412747  | -0.128497347 | -1.093154523 | 0.173689619 | yes |
| Lingo3        | -0.299995541 | -1.231140608 | 0.018898574 | -0.104610717 | -1.075204228 | 0.376895963 | yes |
| Glcci1        | -0.299152359 | -1.230421279 | 0.014410809 | -0.184879985 | -1.136722408 | 0.109744399 | yes |
| Fam126b       | -0.29881915  | -1.23013713  | 0.025974516 | -0.152149379 | -1.111223781 | 0.227683395 | yes |
| Rgs5          | -0.298502248 | -1.229866948 | 0.016135734 | -0.161192714 | -1.118211211 | 0.166453973 | yes |
| Hook3         | -0.297282048 | -1.228827193 | 0.036849518 | -0.105465179 | -1.075841226 | 0.427971827 | yes |
| Sfswap        | -0.296926868 | -1.228524703 | 0.014881912 | -0.123325967 | -1.089243095 | 0.274711488 | yes |
| Sik2          | -0.296082028 | -1.227805491 | 0.032076134 | -0.185035687 | -1.136845094 | 0.162108622 | yes |
| Vegfa         | -0.295321563 | -1.227158469 | 0.01581272  | -0.142668058 | -1.103944817 | 0.211085116 | yes |
| Suclg2        | -0.294223259 | -1.226224605 | 0.04395959  | -0.020302046 | -1.014171787 | 0.882132154 | yes |
| Dnaja4        | -0.29385071  | -1.225907997 | 0.019143433 | -0.185078982 | -1.136879211 | 0.120673969 | yes |
| Wee1          | -0.293155722 | -1.225317583 | 0.03056573  | -0.101746042 | -1.073071376 | 0.423165403 | yes |
| Dimt1         | -0.293140562 | -1.225304708 | 0.037399799 | -0.163982652 | -1.120375742 | 0.222846322 | yes |
| Dnajib1       | -0.292641276 | -1.224880729 | 0.011865206 | -0.150589117 | -1.110022651 | 0.164209271 | yes |
| Akap17b       | -0.292041301 | -1.224371443 | 0.038172401 | -0.104368358 | -1.07502362  | 0.431918183 | yes |
| Golm1         | -0.291645987 | -1.224035998 | 0.016980616 | -0.085087908 | -1.060752375 | 0.4492953   | yes |
| Fstl4         | -0.291012881 | -1.223498965 | 0.047279252 | -0.077444688 | -1.0551475   | 0.575869963 | yes |
| Osbpl6        | -0.290234644 | -1.222839148 | 0.012075638 | -0.170932188 | -1.125785669 | 0.115575759 | yes |
| Ahsa2         | -0.289986845 | -1.222629129 | 0.016137149 | -0.121753126 | -1.088056238 | 0.276399223 | yes |
| Apbb2         | -0.289017817 | -1.221808191 | 0.022689568 | -0.123690386 | -1.089518268 | 0.297373975 | yes |
| Ndufaf4       | -0.288876222 | -1.22168828  | 0.033022523 | -0.131301479 | -1.095281327 | 0.305340118 | yes |
| Xbp1          | -0.288854411 | -1.221669811 | 0.00632261  | -0.121351936 | -1.087753709 | 0.206679106 | yes |
| Srrm2         | -0.288604302 | -1.221458038 | 0.01027349  | -0.098733547 | -1.070833031 | 0.335722116 | yes |
| Daam2         | -0.287367986 | -1.22041176  | 0.04634826  | -0.056520901 | -1.039954854 | 0.67480723  | yes |
| lpmk          | -0.286612476 | -1.219772822 | 0.007380409 | -0.109752118 | -1.079042821 | 0.258583438 | yes |
| Akap13        | -0.286389208 | -1.219584068 | 0.03107377  | -0.150002052 | -1.10957105  | 0.233291677 | yes |
| F420014N23Rik | -0.286031762 | -1.219281937 | 0.046293702 | -0.121343982 | -1.087747712 | 0.373680772 | yes |
| Slc25a42      | -0.285747804 | -1.219041976 | 0.029690536 | -0.131731355 | -1.095607734 | 0.288139107 | yes |
| Tra2a         | -0.285627105 | -1.218939992 | 0.046166866 | -0.125740558 | -1.091067651 | 0.353636643 | yes |
| Ltbp3         | -0.285476818 | -1.218813021 | 0.027274692 | -0.078024638 | -1.055571744 | 0.516887327 | yes |
| Med12l        | -0.285212183 | -1.218589473 | 0.034866784 | -0.061635692 | -1.043648353 | 0.625076636 | yes |
| Mat2a         | -0.284344091 | -1.217856449 | 0.017075778 | -0.18551096  | -1.137219671 | 0.101625326 | yes |
| Cntnap1       | -0.284292847 | -1.217813193 | 0.009497783 | -0.123318127 | -1.089237176 | 0.220517434 | yes |
| Ick           | -0.283401836 | -1.217061302 | 0.02221283  | -0.050767185 | -1.035815595 | 0.656914238 | yes |
| Eif5a2        | -0.28223429  | -1.216076755 | 0.037490259 | -0.176570028 | -1.130193681 | 0.174624324 | yes |
| Atp2b2        | -0.281902962 | -1.215797504 | 0.013691591 | -0.112991996 | -1.081468763 | 0.284147774 | yes |
| Efcab14       | -0.281471931 | -1.215434317 | 0.031609132 | -0.073142199 | -1.052005465 | 0.54962277  | yes |
| Ralgs2        | -0.28102771  | -1.21506013  | 0.025567429 | -0.107691958 | -1.077503054 | 0.36030792  | yes |
| Syne1         | -0.280852672 | -1.214912719 | 0.00821196  | -0.116138224 | -1.083829803 | 0.231383008 | yes |

|               |              |              |             |              |              |             |     |
|---------------|--------------|--------------|-------------|--------------|--------------|-------------|-----|
| Ptpn1         | -0.280499631 | -1.214615454 | 0.006740767 | -0.107055685 | -1.077027947 | 0.253725561 | yes |
| Dpf2          | -0.280062954 | -1.214247869 | 0.013493603 | -0.146143849 | -1.106607686 | 0.167453561 | yes |
| Tnks          | -0.279424087 | -1.213710284 | 0.009996784 | -0.116413052 | -1.084036288 | 0.242246721 | yes |
| Rgs20         | -0.279106832 | -1.213443413 | 0.014472544 | -0.068594376 | -1.048694438 | 0.510941764 | yes |
| Setd8         | -0.278407535 | -1.21285538  | 0.019728335 | -0.136790421 | -1.09945642  | 0.222020303 | yes |
| 9330159F19Rik | -0.277159848 | -1.211806919 | 0.033756964 | -0.103649195 | -1.074487869 | 0.396944656 | yes |
| Sorl1         | -0.276953851 | -1.211633902 | 0.043954523 | -0.133214335 | -1.096734514 | 0.305971002 | yes |
| Asap2         | -0.276931443 | -1.211615083 | 0.026623569 | -0.060684702 | -1.042960631 | 0.600108998 | yes |
| Ptpn3         | -0.276692652 | -1.211414556 | 0.026452132 | -0.131714317 | -1.095594795 | 0.261936394 | yes |
| Fkbp5         | -0.276231772 | -1.211027622 | 0.036220386 | -0.119096893 | -1.086054794 | 0.339620218 | yes |
| Rbm12         | -0.27605884  | -1.210882468 | 0.048479024 | -0.1282443   | -1.092962801 | 0.336374293 | yes |
| Dmxl1         | -0.275651045 | -1.210540247 | 0.027458621 | -0.138157802 | -1.100498975 | 0.241748069 | yes |
| Csmd2         | -0.275086092 | -1.210066297 | 0.021119261 | -0.152801973 | -1.11172655  | 0.174969253 | yes |
| Stim2         | -0.274029346 | -1.209180271 | 0.0447101   | -0.162819295 | -1.11947266  | 0.213284831 | yes |
| Adgrf5        | -0.271943864 | -1.207433609 | 0.040969896 | -0.075647527 | -1.053833924 | 0.545613472 | yes |
| Dcp1a         | -0.271673497 | -1.207207352 | 0.035712944 | -0.128101871 | -1.092854905 | 0.296182867 | yes |
| Phrf1         | -0.270876598 | -1.206540713 | 0.017129424 | -0.099608954 | -1.071482995 | 0.343521049 | yes |
| Uggt1         | -0.270640525 | -1.206343298 | 0.023763682 | -0.113175957 | -1.081606673 | 0.312275152 | yes |
| Bcl11b        | -0.270416802 | -1.206156242 | 0.024979555 | -0.225220447 | -1.168955854 | 0.0561514   | yes |
| Ccdc88a       | -0.270230423 | -1.206000431 | 0.037541437 | -0.082787154 | -1.059062076 | 0.49653241  | yes |
| Elac2         | -0.270097771 | -1.205889548 | 0.017936559 | -0.060152972 | -1.042576301 | 0.56601093  | yes |
| Lynx1         | -0.269247936 | -1.205179415 | 0.047505264 | -0.145765909 | -1.106317828 | 0.260169361 | yes |
| Srrm1         | -0.269054845 | -1.205018124 | 0.010301243 | -0.100394833 | -1.072066823 | 0.295239183 | yes |
| Bmi1          | -0.268380849 | -1.204455297 | 0.008989875 | -0.093917166 | -1.067264058 | 0.314901909 | yes |
| 2700029M09Rik | -0.265915132 | -1.202398515 | 0.020043508 | -0.124180166 | -1.08988821  | 0.246098942 | yes |
| Mfhas1        | -0.265815503 | -1.202315483 | 0.021443575 | -0.115058757 | -1.083019153 | 0.286958513 | yes |
| Adgra2        | -0.265533863 | -1.202080792 | 0.047147    | -0.129597917 | -1.093988761 | 0.310042825 | yes |
| Pde4a         | -0.265495701 | -1.202048995 | 0.005209986 | -0.121432122 | -1.087814169 | 0.15964539  | yes |
| Sox5          | -0.265455206 | -1.202015255 | 0.024488479 | -0.100362251 | -1.072042611 | 0.362562705 | yes |
| Zfp385b       | -0.265337215 | -1.201916952 | 0.039765931 | -0.11752453  | -1.084871771 | 0.336846065 | yes |
| Ttbk2         | -0.265045663 | -1.201674083 | 0.013702431 | -0.083816001 | -1.059817607 | 0.395253067 | yes |
| Abi3          | -0.265044939 | -1.20167348  | 0.031149606 | -0.132272257 | -1.096018581 | 0.256218953 | yes |
| Plekha3       | -0.264943971 | -1.201589383 | 0.011271291 | -0.138366638 | -1.100658289 | 0.155005648 | yes |
| Trove2        | -0.264814073 | -1.201481199 | 0.038886858 | -0.12003674  | -1.086762538 | 0.3228028   | yes |
| Fubp1         | -0.263875541 | -1.20069984  | 0.024517595 | -0.159046782 | -1.116549167 | 0.154197705 | yes |
| Kcnab3        | -0.263840631 | -1.200670787 | 0.031189812 | -0.102522222 | -1.073648852 | 0.373066443 | yes |
| Ubr2          | -0.263430508 | -1.200329514 | 0.012723652 | -0.118117884 | -1.085318051 | 0.227479479 | yes |
| Ccdc6         | -0.263346555 | -1.200259667 | 0.034817855 | -0.177219112 | -1.130702281 | 0.140559252 | yes |
| Ints10        | -0.26319886  | -1.200136797 | 0.013379165 | -0.099561014 | -1.071447391 | 0.309549781 | yes |
| Gabra2        | -0.73113798  | -1.659947922 | 0.000165951 | -0.399788164 | -1.319314177 | 0.015270262 | no  |
| Gm3636        | -1.527102718 | -2.88206469  | 0.047699908 | -0.67836752  | -1.600327881 | 0.353133607 | no  |
| Rxfp2         | -1.084176686 | -2.120165207 | 0.006213568 | -0.481011341 | -1.395721736 | 0.18248157  | no  |

|               |              |              |             |              |              |             |    |
|---------------|--------------|--------------|-------------|--------------|--------------|-------------|----|
| Plekhg4       | -1.023446817 | -2.032769758 | 0.005517209 | -0.487334137 | -1.401852089 | 0.147354962 | no |
| Robo3         | -1.002073512 | -2.002876565 | 0.004396831 | -0.527512602 | -1.441441815 | 0.086284802 | no |
| Npc1l1        | -0.942629411 | -1.922028077 | 0.0086858   | -0.423658655 | -1.341324827 | 0.198876044 | no |
| Xirp2         | -0.927229125 | -1.901620188 | 0.021105038 | -0.480034481 | -1.394777002 | 0.204397167 | no |
| Adam33        | -0.906193596 | -1.874094363 | 0.042789843 | -0.453444996 | -1.369306108 | 0.285752494 | no |
| Flt3          | -0.874450806 | -1.833310063 | 0.005510419 | -0.437095108 | -1.353875529 | 0.129405159 | no |
| Scn4b         | -0.858324121 | -1.81293113  | 0.034629076 | -0.417026384 | -1.335172721 | 0.247650331 | no |
| Moap1         | -0.836460071 | -1.785663295 | 0.045623323 | -0.458639594 | -1.374245346 | 0.252467828 | no |
| Tmem170       | -0.832102272 | -1.780277665 | 0.021502565 | -0.380928932 | -1.302180041 | 0.261314661 | no |
| Tanc1         | -0.729566189 | -1.658140422 | 0.002275916 | -0.456133654 | -1.371860375 | 0.036513023 | no |
| Dok3          | -0.674452688 | -1.59599119  | 0.007365405 | -0.402322124 | -1.321633466 | 0.086304559 | no |
| 5730507C01Rik | -0.667226039 | -1.58801665  | 0.019842442 | -0.37974723  | -1.301113871 | 0.160788151 | no |
| Banp          | -0.665869436 | -1.5865241   | 0.012898133 | -0.392234714 | -1.312424757 | 0.110740829 | no |
| Tmem181b-ps   | -0.812906234 | -1.756746755 | 0.000386121 | -0.365353185 | -1.288196953 | 0.048236757 | no |
| Inf2          | -0.566895812 | -1.481332816 | 0.0000958   | -0.278718466 | -1.213116804 | 0.021925699 | no |
| Prss23        | -0.569272201 | -1.483774859 | 0.000721364 | -0.302303226 | -1.233111474 | 0.042196894 | no |
| Cbfa2t3       | -0.54070776  | -1.454685985 | 0.002553356 | -0.3266252   | -1.254076364 | 0.044913305 | no |
| Gse1          | -0.475364832 | -1.39026975  | 0.000674159 | -0.258070881 | -1.19587855  | 0.036714885 | no |

**Suppl. Table 6 List of genes down-regulated in Shank3-deficient mice and recovered by UNC0642 treatment [Het+SAL\_vs\_WT (fold change > 1.2 & P < 0.05) and Het+UNC\_vs\_WT (-1.3 < fold change < 1.3 & P > 0.05)]**

| Gene Symbol   | logFC (SAL_vs_WT) | Fold change (SAL_vs_WT) | P.Value (SAL_vs_WT) | logFC (UNC_vs_WT) | Fold change (UNC_vs_WT) | P.Value (UNC_vs_WT) | Restored |
|---------------|-------------------|-------------------------|---------------------|-------------------|-------------------------|---------------------|----------|
| Fdft1         | 0.267010659       | 1.203311916             | 0.008881474         | 0.075251262       | 1.053544507             | 0.414847947         | yes      |
| Ric8          | 0.270509286       | 1.206233565             | 0.010698844         | 0.0605254         | 1.042845475             | 0.528291388         | yes      |
| Phf13         | 0.271448635       | 1.207019208             | 0.024602701         | 0.036810948       | 1.025843709             | 0.741406122         | yes      |
| Wdr19         | 0.279204938       | 1.213525932             | 0.026421647         | -0.001819773      | -1.001262166            | 0.987505578         | yes      |
| Gpr89         | 0.286172119       | 1.219400565             | 0.032662567         | 0.018834509       | 1.013140677             | 0.879812793         | yes      |
| Ppapdc1b      | 0.289644249       | 1.222338826             | 0.015051431         | 0.032802552       | 1.022997452             | 0.762318828         | yes      |
| Fbxw9         | 0.289709977       | 1.222394516             | 0.018918709         | 0.032382818       | 1.022699867             | 0.774635494         | yes      |
| 2610001J05Rik | 0.292826824       | 1.225038274             | 0.010456966         | 0.054697373       | 1.03864121              | 0.596503418         | yes      |
| Arl4a         | 0.310871463       | 1.240456774             | 0.005817242         | 0.099967562       | 1.071749365             | 0.322982113         | yes      |
| Dusp1         | 0.311729219       | 1.241194509             | 0.004799451         | 0.075197731       | 1.053505416             | 0.442900519         | yes      |
| Elp6          | 0.313547912       | 1.242760172             | 0.03437204          | 0.024097729       | 1.016843553             | 0.861392209         | yes      |
| Slc35f5       | 0.314281822       | 1.243392535             | 0.014110315         | 0.05690545        | 1.040232091             | 0.625571661         | yes      |
| Cd200         | 0.315194319       | 1.244179223             | 0.004222974         | 0.078500049       | 1.055919644             | 0.4202155           | yes      |
| Usp16         | 0.316310618       | 1.245142291             | 0.036739738         | -0.009514718      | -1.006616895            | 0.946049056         | yes      |
| Ntng1         | 0.318867098       | 1.24735066              | 0.044813032         | -0.042435858      | -1.029851168            | 0.776103335         | yes      |
| Leprot        | 0.319203409       | 1.247641467             | 0.00731817          | 0.079214722       | 1.056442848             | 0.458342689         | yes      |
| Dpysl5        | 0.32220963        | 1.250243955             | 0.007325461         | 0.09525238        | 1.068252268             | 0.378784637         | yes      |
| Fra10ac1      | 0.325138553       | 1.252784747             | 0.025838075         | -0.001341321      | -1.000930165            | 0.992055466         | yes      |
| Ddx3y         | 0.325603989       | 1.253188981             | 0.003845087         | 0.082344472       | 1.058737159             | 0.40718299          | yes      |
| Txn1          | 0.32616835        | 1.253679306             | 0.004057415         | 0.080697538       | 1.057529228             | 0.420657406         | yes      |
| Ndn           | 0.330624773       | 1.257557854             | 0.003166093         | 0.10007383        | 1.071828312             | 0.310844206         | yes      |
| Bbs9          | 0.33704102        | 1.263163177             | 0.020381765         | 0.056533025       | 1.039963594             | 0.67230212          | yes      |
| Atraid        | 0.340229177       | 1.26595768              | 0.002413122         | 0.134269829       | 1.097537192             | 0.176155528         | yes      |
| Taf6l         | 0.340403676       | 1.266110811             | 0.027967728         | 0.032532046       | 1.022805658             | 0.820596952         | yes      |
| Wbp5          | 0.341109449       | 1.26673035              | 0.003142542         | 0.117538151       | 1.084882014             | 0.250340478         | yes      |
| Gap43         | 0.344691204       | 1.269879148             | 0.005091387         | 0.100761541       | 1.072339358             | 0.356760829         | yes      |
| Cep83os       | 0.350514036       | 1.275014838             | 0.004518219         | 0.081232776       | 1.057921643             | 0.456872993         | yes      |
| Noa1          | 0.353128316       | 1.277327362             | 0.012013202         | 0.053019824       | 1.037434192             | 0.677064618         | yes      |
| Mrpl57        | 0.358880962       | 1.282430784             | 0.008673912         | 0.090539963       | 1.064768623             | 0.462866076         | yes      |
| Celf6         | 0.360576289       | 1.283938669             | 0.003825584         | 0.104025858       | 1.074768436             | 0.345582315         | yes      |
| Coa7          | 0.367250392       | 1.289892103             | 0.010489452         | 0.014458386       | 1.010072176             | 0.910823897         | yes      |
| Izumo4        | 0.383402613       | 1.304414708             | 0.005250518         | 0.043562963       | 1.030656054             | 0.719364806         | yes      |
| Fxyd6         | 0.38569266        | 1.306486901             | 0.003898136         | 0.140356316       | 1.102177298             | 0.235652321         | yes      |
| Bmp3          | 0.38640318        | 1.307130498             | 0.002413442         | 0.149460063       | 1.109154287             | 0.184438577         | yes      |
| Gm10677       | 0.391481951       | 1.311740145             | 0.00487362          | 0.123734943       | 1.089551917             | 0.318888935         | yes      |
| Xrcc6         | 0.397519114       | 1.31724081              | 0.02125123          | -0.006346009      | -1.004408407            | 0.968055019         | yes      |
| Pstpip2       | 0.398141315       | 1.317809027             | 0.023729177         | 0.054574863       | 1.038553014             | 0.736912149         | yes      |
| Snrpd1        | 0.403756186       | 1.322947844             | 0.004027271         | 0.068274416       | 1.048461885             | 0.579623985         | yes      |

|               |             |             |             |              |              |             |     |
|---------------|-------------|-------------|-------------|--------------|--------------|-------------|-----|
| Btd           | 0.406328406 | 1.325308668 | 0.014528657 | 0.0274845    | 1.019233428  | 0.855630302 | yes |
| Tshz2         | 0.409130306 | 1.327885089 | 0.00179239  | 0.153877297  | 1.112555492  | 0.180242522 | yes |
| Rccd1         | 0.409454649 | 1.328183655 | 0.04010269  | -0.001873805 | -1.001299667 | 0.991982401 | yes |
| Crhbp         | 0.413666831 | 1.332067168 | 0.00105613  | 0.176959516  | 1.130498844  | 0.108384147 | yes |
| Klf5          | 0.416325613 | 1.334524335 | 0.024888494 | -0.041418058 | -1.02912488  | 0.808998612 | yes |
| Htr2c         | 0.42410697  | 1.341741706 | 0.001538124 | 0.18150264   | 1.134064456  | 0.123586236 | yes |
| Dars2         | 0.427110945 | 1.344538387 | 0.004143206 | 0.142478977  | 1.103800143  | 0.282835228 | yes |
| Glra2         | 0.429039128 | 1.346336584 | 0.007216279 | 0.076320915  | 1.054325923  | 0.59268809  | yes |
| Tusc1         | 0.432002607 | 1.349104972 | 0.038603785 | -0.039627216 | -1.027848203 | 0.839101626 | yes |
| Cdk5rap3      | 0.434315915 | 1.351269948 | 0.000952036 | 0.190375503  | 1.141060671  | 0.096812305 | yes |
| Gm9866        | 0.435625218 | 1.352496835 | 0.002372716 | 0.094889462  | 1.067983577  | 0.445342222 | yes |
| Ccdc53        | 0.439627314 | 1.356253926 | 0.021457984 | 0.066312846  | 1.047037305  | 0.706276886 | yes |
| Cntnap4       | 0.454226076 | 1.370047655 | 0.001085613 | 0.036217937  | 1.025422129  | 0.756359799 | yes |
| Nov           | 0.461867167 | 1.377323227 | 0.000634608 | 0.205519496  | 1.153101489  | 0.077344404 | yes |
| Zkscan4       | 0.469553978 | 1.384681315 | 0.034570138 | 0.022996129  | 1.016067417  | 0.911494577 | yes |
| Dhrs7b        | 0.478561176 | 1.393353359 | 0.001195538 | 0.131394063  | 1.095351618  | 0.298406739 | yes |
| Cort          | 0.496265567 | 1.410557587 | 0.017580427 | -0.017564948 | -1.012249512 | 0.926686327 | yes |
| Tmem169       | 0.497638529 | 1.411900604 | 0.000669336 | 0.116621715  | 1.084193088  | 0.341022013 | yes |
| Tmem117       | 0.504953063 | 1.419077187 | 0.024583229 | 0.058496719  | 1.041380082  | 0.777886905 | yes |
| Cd24a         | 0.505623294 | 1.419736598 | 0.010650729 | 0.0967748    | 1.069380148  | 0.588686725 | yes |
| Sema3f        | 0.51354144  | 1.427550161 | 0.008797098 | 0.14607281   | 1.106553197  | 0.409923034 | yes |
| Zfand4        | 0.533092355 | 1.447027515 | 0.026404812 | 0.045714618  | 1.032194335  | 0.83684469  | yes |
| Fancl         | 0.534031978 | 1.447970267 | 0.008827883 | 0.09433671   | 1.06757447   | 0.606684878 | yes |
| AA414768      | 0.543200626 | 1.457201743 | 0.01499948  | 0.100749667  | 1.072330532  | 0.621005449 | yes |
| Bex4          | 0.556464684 | 1.470660952 | 0.00406571  | 0.163021825  | 1.119629826  | 0.342384949 | yes |
| Gprin3        | 0.558098296 | 1.472327174 | 0.017392731 | 0.074610733  | 1.053076857  | 0.728122615 | yes |
| A730017C20Rik | 0.562652661 | 1.476982427 | 0.000430213 | 0.189933496  | 1.140711131  | 0.155432224 | yes |
| Trhr          | 0.608935292 | 1.525133246 | 0.006022511 | 0.12004773   | 1.086770816  | 0.542802952 | yes |
| Epha8         | 0.616573587 | 1.533229421 | 0.011455437 | 0.156668794  | 1.11471028   | 0.479640877 | yes |
| Fam26e        | 0.625080634 | 1.542297024 | 0.008614503 | 0.138999343  | 1.101141097  | 0.516338867 | yes |
| Rwdd2b        | 0.627369612 | 1.544745973 | 0.008062908 | 0.098395445  | 1.070582106  | 0.640825732 | yes |
| Rsph9         | 0.651867298 | 1.571200504 | 0.001529282 | 0.267048297  | 1.20334331   | 0.139026173 | yes |
| Cbln1         | 0.660845538 | 1.581008953 | 0.000728386 | 0.164911256  | 1.121097114  | 0.316029025 | yes |
| Mtrf1         | 0.665212215 | 1.585801521 | 0.006881654 | 0.199225187  | 1.148081601  | 0.368217493 | yes |
| Ramp3         | 0.670362205 | 1.591472475 | 0.001240058 | 0.202602379  | 1.150772283  | 0.244724526 | yes |
| Lrrc6         | 0.671994376 | 1.593273981 | 0.002253388 | 0.170823987  | 1.125701239  | 0.37152541  | yes |
| Adam18        | 0.773368299 | 1.709255774 | 0.013890496 | 0.022982083  | 1.016057524  | 0.935760099 | yes |
| 3010026O09Rik | 0.820439694 | 1.765944122 | 0.000753096 | 0.268707371  | 1.20472793   | 0.194650362 | yes |
| A930005H10Rik | 0.82376712  | 1.770021789 | 0.000696262 | 0.026149501  | 1.018290716  | 0.896401412 | yes |
| Ucma          | 0.831025294 | 1.778949176 | 0.022887966 | -0.018138426 | -1.012651967 | 0.956960315 | yes |
| Efhc2         | 0.832542664 | 1.780821189 | 0.019455861 | 0.046981089  | 1.033100845  | 0.885558756 | yes |
| 1700003M02Rik | 0.890505593 | 1.853825684 | 0.010527085 | -0.02629718  | -1.018394957 | 0.933082394 | yes |

|          |             |             |             |             |             |             |     |
|----------|-------------|-------------|-------------|-------------|-------------|-------------|-----|
| Myh3     | 1.024674345 | 2.034500091 | 0.001711059 | 0.185441649 | 1.137165038 | 0.506623247 | yes |
| Gm35612  | 1.088533208 | 2.126577168 | 0.011678383 | 0.169789096 | 1.124894028 | 0.663827497 | yes |
| Gm11978  | 1.507810176 | 2.843780624 | 0.002202035 | 0.271600421 | 1.207146206 | 0.521933085 | yes |
| Gnb4     | 0.263550135 | 1.200429048 | 0.041158987 | 0.101196478 | 1.072662691 | 0.407046172 | yes |
| Rraga    | 0.264039266 | 1.200836111 | 0.039627033 | 0.098329244 | 1.070532981 | 0.415356523 | yes |
| Marc2    | 0.264311814 | 1.201062989 | 0.039133477 | 0.222906287 | 1.167082289 | 0.076420571 | yes |
| Wnt7b    | 0.264510515 | 1.201228421 | 0.018948833 | 0.146977838 | 1.107247575 | 0.16687102  | yes |
| Iscu     | 0.264637738 | 1.201334356 | 0.02366523  | 0.066304359 | 1.047031146 | 0.540629729 | yes |
| Sstr1    | 0.265357425 | 1.201933789 | 0.010470638 | 0.091417733 | 1.065416651 | 0.333916274 | yes |
| Ccdc71   | 0.265884081 | 1.202372636 | 0.030141049 | 0.099572958 | 1.071456261 | 0.386858929 | yes |
| Pnma3    | 0.266884536 | 1.203206725 | 0.036303802 | 0.124396052 | 1.090051315 | 0.303291694 | yes |
| Gpr61    | 0.267503248 | 1.203722842 | 0.042247758 | 0.109430904 | 1.078802601 | 0.380561745 | yes |
| Gpr85    | 0.268427119 | 1.204493927 | 0.022528036 | 0.123878095 | 1.089660034 | 0.261774765 | yes |
| Slc25a11 | 0.269315505 | 1.205235861 | 0.038838074 | 0.139049391 | 1.101179297 | 0.261394598 | yes |
| Zfp330   | 0.269716926 | 1.205571257 | 0.024564236 | 0.113385842 | 1.081764038 | 0.313092641 | yes |
| Lcorl    | 0.270001593 | 1.205809159 | 0.048740462 | 0.087718288 | 1.062688145 | 0.498791642 | yes |
| Coq7     | 0.27021611  | 1.205988466 | 0.04477379  | 0.047592284 | 1.033538609 | 0.70683798  | yes |
| Carkd    | 0.271810631 | 1.207322107 | 0.026839285 | 0.14709708  | 1.107339095 | 0.206282038 | yes |
| Sumo3    | 0.272064301 | 1.20753441  | 0.016408714 | 0.11728064  | 1.084688387 | 0.265656796 | yes |
| Tceal1   | 0.272831486 | 1.208176714 | 0.039244582 | 0.091916093 | 1.065784749 | 0.461058032 | yes |
| Cnrip1   | 0.273032398 | 1.208344978 | 0.024400342 | 0.099625038 | 1.071494941 | 0.378132176 | yes |
| Ap2m1    | 0.273092064 | 1.208394953 | 0.037746017 | 0.117851446 | 1.085117632 | 0.341233127 | yes |
| Rpl22l1  | 0.273297968 | 1.20856743  | 0.012159457 | 0.080732486 | 1.057554847 | 0.417082917 | yes |
| Grb10    | 0.273633016 | 1.208848138 | 0.021508202 | 0.211158353 | 1.157617273 | 0.067100266 | yes |
| Zdhhc16  | 0.276057203 | 1.210881094 | 0.01998788  | 0.105403166 | 1.075794983 | 0.339400425 | yes |
| Pls3     | 0.276118604 | 1.210932631 | 0.020340525 | 0.071570794 | 1.050860228 | 0.513604245 | yes |
| Prpf31   | 0.276966518 | 1.21164454  | 0.047584031 | 0.20317394  | 1.151228282 | 0.135151094 | yes |
| Zc4h2    | 0.277061721 | 1.211724499 | 0.034924297 | 0.087647851 | 1.062636263 | 0.477169338 | yes |
| Tm7sf2   | 0.277282796 | 1.211910195 | 0.044854333 | 0.066876851 | 1.047446713 | 0.607372221 | yes |
| Ncald    | 0.278576764 | 1.212997658 | 0.043221315 | 0.088039473 | 1.062924756 | 0.495140334 | yes |
| Efnb3    | 0.280297742 | 1.214445495 | 0.040311936 | 0.097244645 | 1.069728472 | 0.448477632 | yes |
| Eif6     | 0.281428263 | 1.215397529 | 0.024651163 | 0.169819919 | 1.12491806  | 0.154480366 | yes |
| Snca     | 0.281556542 | 1.215505601 | 0.029993207 | 0.104561519 | 1.075167563 | 0.387703856 | yes |
| Pigp     | 0.283060362 | 1.216773267 | 0.036468696 | 0.151448961 | 1.110684421 | 0.240199442 | yes |
| Wibg     | 0.283528233 | 1.217167935 | 0.037727022 | 0.061973529 | 1.043892774 | 0.627771807 | yes |
| Zscan18  | 0.283617721 | 1.217243436 | 0.022115192 | 0.168269703 | 1.123709954 | 0.152737453 | yes |
| Prss12   | 0.283951301 | 1.21752492  | 0.03091357  | 0.14491299  | 1.105663968 | 0.244968193 | yes |
| Rabac1   | 0.284640904 | 1.218107031 | 0.033953686 | 0.144209406 | 1.105124881 | 0.255523253 | yes |
| Nelfe    | 0.285043419 | 1.218446933 | 0.031475353 | 0.144968772 | 1.10570672  | 0.248615312 | yes |
| Lrrc24   | 0.285422954 | 1.218767517 | 0.016083432 | 0.117502603 | 1.084855283 | 0.285276002 | yes |
| Coasy    | 0.285902082 | 1.219172344 | 0.032314421 | 0.106059114 | 1.076284224 | 0.398108606 | yes |
| Orc6     | 0.286584655 | 1.2197493   | 0.041645352 | 0.07852304  | 1.055936471 | 0.553080408 | yes |

|               |             |             |             |             |             |             |     |
|---------------|-------------|-------------|-------------|-------------|-------------|-------------|-----|
| Tmem29        | 0.287685488 | 1.220680372 | 0.040240709 | 0.075114899 | 1.053444931 | 0.568702562 | yes |
| Pex11b        | 0.288882967 | 1.221693993 | 0.043089004 | 0.081403395 | 1.058046765 | 0.544002865 | yes |
| Smyd3         | 0.289017949 | 1.221808302 | 0.045528948 | 0.157619135 | 1.115444811 | 0.25396318  | yes |
| Ngfrap1       | 0.291434871 | 1.223856892 | 0.02201971  | 0.141154365 | 1.102787153 | 0.235960877 | yes |
| Tmem199       | 0.291672652 | 1.224058621 | 0.017819757 | 0.064940281 | 1.046041639 | 0.565649743 | yes |
| 1700037H04Rik | 0.292733522 | 1.22495905  | 0.02871613  | 0.176134727 | 1.129852721 | 0.167288875 | yes |
| Isoc1         | 0.294852275 | 1.226759357 | 0.046351861 | 0.094515071 | 1.067706462 | 0.499334131 | yes |
| 2210015D19Rik | 0.295156475 | 1.227018053 | 0.043460649 | 0.079979521 | 1.057003037 | 0.56128734  | yes |
| Acat2         | 0.296328536 | 1.2280153   | 0.015697478 | 0.154557122 | 1.113079873 | 0.178508669 | yes |
| Slc35b2       | 0.297976287 | 1.22941866  | 0.021059097 | 0.166394914 | 1.122250636 | 0.172961223 | yes |
| Lhpp          | 0.299420286 | 1.230649805 | 0.023620672 | 0.083835112 | 1.059831646 | 0.49458779  | yes |
| Nfkbib        | 0.300079142 | 1.231211952 | 0.045065518 | 0.058597989 | 1.041453185 | 0.677302295 | yes |
| Sf3b6         | 0.300334062 | 1.231429523 | 0.019928229 | 0.091948717 | 1.065808849 | 0.44109676  | yes |
| Rnasel        | 0.300856673 | 1.231875685 | 0.028128454 | 0.119444712 | 1.086316663 | 0.352874323 | yes |
| Ahr           | 0.300923198 | 1.231932489 | 0.049560122 | 0.019315466 | 1.013478488 | 0.893390951 | yes |
| Trappc2l      | 0.301467239 | 1.23239714  | 0.025237459 | 0.190941281 | 1.141508246 | 0.137965156 | yes |
| Klf15         | 0.302299484 | 1.233108276 | 0.038005986 | 0.182732659 | 1.135031754 | 0.190944718 | yes |
| Zcchc12       | 0.304506761 | 1.234996336 | 0.008394114 | 0.167792874 | 1.123338615 | 0.117875461 | yes |
| Psmc9         | 0.305462274 | 1.235814558 | 0.01842273  | 0.097213883 | 1.069705663 | 0.416867794 | yes |
| Ift81         | 0.305519596 | 1.235863661 | 0.0101765   | 0.09963543  | 1.071502659 | 0.357442707 | yes |
| Supt4a        | 0.30614265  | 1.236397507 | 0.019023619 | 0.0740817   | 1.052690767 | 0.53768795  | yes |
| Tuba1a        | 0.306256309 | 1.236494917 | 0.022989111 | 0.09462387  | 1.067786985 | 0.445894597 | yes |
| Cdh13         | 0.306540833 | 1.236738799 | 0.028207395 | 0.040326457 | 1.028346497 | 0.753914255 | yes |
| Sdr39u1       | 0.30679258  | 1.236954625 | 0.018752989 | 0.139792288 | 1.101746481 | 0.251310251 | yes |
| Stmn4         | 0.30762419  | 1.237667846 | 0.009560701 | 0.147503034 | 1.107650729 | 0.177520844 | yes |
| Tmem9         | 0.307871898 | 1.23788037  | 0.026260011 | 0.140928031 | 1.102614157 | 0.277790856 | yes |
| Lingo2        | 0.308156239 | 1.238124369 | 0.020616932 | 0.122277635 | 1.088451885 | 0.324099442 | yes |
| Psen2         | 0.308818061 | 1.238692476 | 0.033695175 | 0.102159135 | 1.073378678 | 0.45412608  | yes |
| Apoa1bp       | 0.30890012  | 1.238762934 | 0.046207102 | 0.168999961 | 1.124278893 | 0.25357445  | yes |
| Pithd1        | 0.310380407 | 1.240034627 | 0.017474634 | 0.093500679 | 1.066955998 | 0.435545    | yes |
| Ydjc          | 0.311321897 | 1.240844126 | 0.032946162 | 0.161940064 | 1.118790621 | 0.242861041 | yes |
| Ube2s         | 0.312388229 | 1.241761604 | 0.017879722 | 0.10174634  | 1.073071599 | 0.402750532 | yes |
| Pet100        | 0.312778835 | 1.242097854 | 0.037520364 | 0.033692723 | 1.023628856 | 0.810397095 | yes |
| Wdpcp         | 0.313253914 | 1.242506943 | 0.043109239 | 0.084896824 | 1.060611887 | 0.560488326 | yes |
| Lrrcc1        | 0.313944484 | 1.243101832 | 0.019527003 | 0.16537131  | 1.121454673 | 0.19113717  | yes |
| Tab1          | 0.314012431 | 1.243160381 | 0.011947981 | 0.147307722 | 1.107500785 | 0.203016939 | yes |
| Cntn6         | 0.315381632 | 1.244340772 | 0.042629328 | 0.157776694 | 1.115566637 | 0.287348912 | yes |
| Chid1         | 0.315392193 | 1.244349881 | 0.023565004 | 0.109050333 | 1.078518059 | 0.398921474 | yes |
| Snx8          | 0.31632719  | 1.245156594 | 0.038047408 | 0.130868671 | 1.094952792 | 0.364127976 | yes |
| Thtpa         | 0.317432684 | 1.246111085 | 0.020205776 | 0.090213234 | 1.064527511 | 0.47513497  | yes |
| Yif1a         | 0.317488442 | 1.246159246 | 0.038863344 | 0.041177322 | 1.028953169 | 0.774521281 | yes |
| 1110004F10Rik | 0.317632583 | 1.246283758 | 0.006864883 | 0.124426141 | 1.090074049 | 0.243172905 | yes |

|               |             |             |             |             |             |             |     |
|---------------|-------------|-------------|-------------|-------------|-------------|-------------|-----|
| Dolk          | 0.318784303 | 1.247279077 | 0.021817578 | 0.084432471 | 1.060270569 | 0.511428831 | yes |
| Glt8d2        | 0.318860432 | 1.247344896 | 0.036940654 | 0.178079905 | 1.131377124 | 0.221652091 | yes |
| Lrrc61        | 0.318959899 | 1.247430898 | 0.048252476 | 0.174180632 | 1.1283234   | 0.259856737 | yes |
| Cdkl1         | 0.320202717 | 1.248505968 | 0.03621484  | 0.052051039 | 1.036737777 | 0.715493483 | yes |
| Tceal6        | 0.322529808 | 1.250521454 | 0.027083608 | 0.129475224 | 1.093895728 | 0.342567841 | yes |
| Tceal8        | 0.322741617 | 1.250705062 | 0.007357533 | 0.163287295 | 1.119835868 | 0.140935758 | yes |
| Cdc26         | 0.323057727 | 1.250979135 | 0.033219852 | 0.107819105 | 1.07759802  | 0.448822662 | yes |
| Omg           | 0.323490334 | 1.25135431  | 0.014267681 | 0.123297291 | 1.089221444 | 0.308782168 | yes |
| Snrnp25       | 0.324022673 | 1.251816132 | 0.036074598 | 0.108835041 | 1.078357124 | 0.454017717 | yes |
| C030006K11Rik | 0.324080852 | 1.251866614 | 0.047456149 | 0.029037469 | 1.020331159 | 0.850090951 | yes |
| Fabp3         | 0.32478696  | 1.252479474 | 0.021395037 | 0.162119214 | 1.118929558 | 0.219478668 | yes |
| Tceal5        | 0.326028895 | 1.253558127 | 0.015647789 | 0.144112127 | 1.105050367 | 0.249193679 | yes |
| Dpysl3        | 0.3272343   | 1.254605942 | 0.013466104 | 0.16819806  | 1.123654153 | 0.172037918 | yes |
| Plcd3         | 0.32932505  | 1.256425431 | 0.038101594 | 0.150083487 | 1.109633684 | 0.318910785 | yes |
| Tmem86a       | 0.330547106 | 1.257490156 | 0.02056093  | 0.153220022 | 1.112048741 | 0.251681099 | yes |
| Fam185a       | 0.330659704 | 1.257588303 | 0.02134511  | 0.104982944 | 1.075481676 | 0.430642063 | yes |
| Itpka         | 0.331108703 | 1.257979753 | 0.019626819 | 0.177165476 | 1.130660245 | 0.181599711 | yes |
| Thsd4         | 0.331334288 | 1.258176471 | 0.045373396 | 0.217609433 | 1.162805204 | 0.173594801 | yes |
| Cisd3         | 0.333822463 | 1.260348285 | 0.033773643 | 0.156958563 | 1.114934195 | 0.291793546 | yes |
| Rab33a        | 0.333960772 | 1.260469118 | 0.037028742 | 0.202599982 | 1.150770371 | 0.186362141 | yes |
| Tubb2a        | 0.334350004 | 1.260809232 | 0.022562622 | 0.131514944 | 1.0954434   | 0.331226586 | yes |
| Acot9         | 0.335577081 | 1.261882064 | 0.025617539 | 0.056823416 | 1.040172943 | 0.683021756 | yes |
| Sfxn4         | 0.337767348 | 1.263799279 | 0.027361682 | 0.109758167 | 1.079047345 | 0.442457467 | yes |
| Rbp4          | 0.341184795 | 1.266796507 | 0.012545763 | 0.108988951 | 1.078472172 | 0.383499029 | yes |
| Ddt           | 0.344025639 | 1.269293443 | 0.015493989 | 0.148497442 | 1.108414464 | 0.260296598 | yes |
| Fbll1         | 0.34768045  | 1.272513049 | 0.008587012 | 0.162879493 | 1.119519372 | 0.180703185 | yes |
| Ofd1          | 0.350006941 | 1.274566759 | 0.038149864 | 0.063997277 | 1.045358127 | 0.685453556 | yes |
| Emc9          | 0.350355514 | 1.274874748 | 0.013023368 | 0.15565331  | 1.113925934 | 0.233375632 | yes |
| Ndufb4        | 0.35117386  | 1.275598105 | 0.014640987 | 0.130903094 | 1.094978918 | 0.321356566 | yes |
| Slc22a8       | 0.353714567 | 1.27784652  | 0.02665934  | 0.24174458  | 1.182421641 | 0.115064156 | yes |
| Cxx1a         | 0.354365417 | 1.278423131 | 0.034692249 | 0.177611048 | 1.1310095   | 0.264916275 | yes |
| Dnajc30       | 0.354414466 | 1.278466596 | 0.020167095 | 0.170281871 | 1.125278318 | 0.232428385 | yes |
| Arrdc1        | 0.360578023 | 1.283940211 | 0.048683134 | 0.231881367 | 1.174365399 | 0.189286762 | yes |
| St6gal2       | 0.361370697 | 1.284645853 | 0.030600525 | 0.221258307 | 1.165749901 | 0.166256417 | yes |
| Hint2         | 0.361712984 | 1.284950678 | 0.011271138 | 0.122949091 | 1.088958588 | 0.345989565 | yes |
| Mrgpre        | 0.361719085 | 1.284956112 | 0.019688356 | 0.084544402 | 1.060352833 | 0.554038003 | yes |
| Zfp575        | 0.361760765 | 1.284993235 | 0.04040521  | 0.100439973 | 1.072100367 | 0.545104721 | yes |
| 6430573F11Rik | 0.362835511 | 1.285950857 | 0.043956423 | 0.126014904 | 1.09127515  | 0.459214371 | yes |
| Cryl1         | 0.364265075 | 1.287225735 | 0.027592675 | 0.136414893 | 1.099170273 | 0.378305326 | yes |
| A930017M01Rik | 0.364967298 | 1.287852437 | 0.040155726 | 0.153055455 | 1.111921897 | 0.363511426 | yes |
| Kiss1r        | 0.368191708 | 1.290733994 | 0.042992685 | 0.147396246 | 1.107568744 | 0.392492734 | yes |
| Znhit2        | 0.369674069 | 1.292060897 | 0.011876477 | 0.150927139 | 1.110282759 | 0.264564369 | yes |



|               |             |             |             |             |             |             |     |
|---------------|-------------|-------------|-------------|-------------|-------------|-------------|-----|
| Tpst2         | 0.369933126 | 1.292292927 | 0.017967808 | 0.173722102 | 1.127964843 | 0.233916484 | yes |
| Pcsk5         | 0.370129819 | 1.292469127 | 0.017607208 | 0.158161501 | 1.11586423  | 0.275658045 | yes |
| Tmem192       | 0.371518344 | 1.293713665 | 0.022860889 | 0.06192383  | 1.043856813 | 0.68096125  | yes |
| Syt5          | 0.372466576 | 1.294564257 | 0.004761653 | 0.143568798 | 1.104634275 | 0.222920134 | yes |
| Tmem141       | 0.372509649 | 1.294602908 | 0.012936821 | 0.189553334 | 1.140410584 | 0.174666569 | yes |
| Sdr42e1       | 0.374031849 | 1.295969575 | 0.017252787 | 0.175242671 | 1.12915432  | 0.23201729  | yes |
| Tctex1d2      | 0.374647361 | 1.296522606 | 0.034926573 | 0.106790169 | 1.076829747 | 0.521228585 | yes |
| Mzt2          | 0.375178493 | 1.297000012 | 0.017977727 | 0.15026847  | 1.10977597  | 0.3076166   | yes |
| Gpr62         | 0.376644112 | 1.298318291 | 0.016394801 | 0.164763613 | 1.120982389 | 0.258850218 | yes |
| Pnck          | 0.378254592 | 1.299768412 | 0.002511966 | 0.161912887 | 1.118769545 | 0.146223146 | yes |
| Pcdhb20       | 0.379279302 | 1.300691933 | 0.01493473  | 0.168929928 | 1.124224319 | 0.243036192 | yes |
| Sdhaf1        | 0.379597751 | 1.300979069 | 0.047989385 | 0.154372673 | 1.112937575 | 0.397308244 | yes |
| Fxyd1         | 0.379875232 | 1.301229317 | 0.036882253 | 0.318250743 | 1.246817874 | 0.074608929 | yes |
| Lgals1        | 0.380974255 | 1.302220951 | 0.024679474 | 0.16702263  | 1.122739033 | 0.293895752 | yes |
| Epm2a         | 0.38147294  | 1.302671157 | 0.016706851 | 0.087055151 | 1.062199791 | 0.551440295 | yes |
| Tuba1b        | 0.384704961 | 1.305592759 | 0.035637656 | 0.175651577 | 1.129474404 | 0.300407551 | yes |
| Jsrp1         | 0.385359804 | 1.306185505 | 0.049814877 | 0.251384235 | 1.190348682 | 0.185661105 | yes |
| Sh2d3c        | 0.385672055 | 1.306468241 | 0.016301049 | 0.191788477 | 1.142178772 | 0.200366144 | yes |
| Fabp5         | 0.391657196 | 1.311899493 | 0.040052868 | 0.241361432 | 1.182107658 | 0.181345542 | yes |
| B230217O12Rik | 0.393110278 | 1.313221503 | 0.027010502 | 0.122887879 | 1.088912386 | 0.458512921 | yes |
| Ccdc65        | 0.395027003 | 1.314967373 | 0.031526345 | 0.194723821 | 1.144505044 | 0.263042417 | yes |
| Usb1          | 0.395642239 | 1.315528258 | 0.033175184 | 0.040468496 | 1.028447747 | 0.814916929 | yes |
| Bmyc          | 0.398844214 | 1.318451237 | 0.022083918 | 0.169049532 | 1.124317524 | 0.295102282 | yes |
| Zeb2os        | 0.399640111 | 1.319178793 | 0.03842395  | 0.191901397 | 1.142268174 | 0.295330263 | yes |
| A830009L08Rik | 0.399645023 | 1.319183284 | 0.048704858 | 0.22810392  | 1.171294548 | 0.241410218 | yes |
| Man1a         | 0.403162717 | 1.322403747 | 0.008306464 | 0.240626672 | 1.181505768 | 0.090495864 | yes |
| Rpl14         | 0.404074743 | 1.323239992 | 0.021749619 | 0.215570903 | 1.161163319 | 0.185827392 | yes |
| Rft1          | 0.404769875 | 1.323877721 | 0.019736914 | 0.237229039 | 1.178726525 | 0.149048629 | yes |
| Gpr135        | 0.405787359 | 1.324811737 | 0.027235464 | 0.147992971 | 1.108026949 | 0.389360086 | yes |
| Amigo2        | 0.409098824 | 1.327856113 | 0.03811678  | 0.160404879 | 1.117600738 | 0.388460808 | yes |
| Polm          | 0.411248946 | 1.32983656  | 0.049940865 | 0.226173718 | 1.169728505 | 0.261082404 | yes |
| Tmem138       | 0.412491723 | 1.330982611 | 0.021045582 | 0.209492867 | 1.156281659 | 0.212910069 | yes |
| Spag6         | 0.41390457  | 1.332286696 | 0.030292018 | 0.139744918 | 1.101710306 | 0.434793306 | yes |
| Trem2         | 0.416523572 | 1.334707464 | 0.016579946 | 0.126215865 | 1.091427171 | 0.430323281 | yes |
| Nsmce1        | 0.417148451 | 1.335285695 | 0.006684383 | 0.145277509 | 1.105943366 | 0.295444338 | yes |
| Alg14         | 0.417811376 | 1.335899406 | 0.014766853 | 0.175698953 | 1.129511495 | 0.268352324 | yes |
| Dbp           | 0.418429977 | 1.336472337 | 0.003527761 | 0.257098318 | 1.195072645 | 0.051629534 | yes |
| Fan1          | 0.418675721 | 1.336700007 | 0.040924377 | 0.209429311 | 1.156230722 | 0.282999154 | yes |
| Nrep          | 0.418891979 | 1.336900392 | 0.005899857 | 0.186519473 | 1.138014921 | 0.173706052 | yes |
| Vwc2l         | 0.420293322 | 1.338199603 | 0.016828404 | 0.253263539 | 1.19190028  | 0.127899375 | yes |
| Scd3          | 0.422691494 | 1.340425925 | 0.04992302  | 0.139720694 | 1.101691808 | 0.493935692 | yes |
| Grp           | 0.423968827 | 1.341613235 | 0.006957316 | 0.214813898 | 1.160554198 | 0.13721239  | yes |

|               |             |             |             |             |             |             |     |
|---------------|-------------|-------------|-------------|-------------|-------------|-------------|-----|
| Cpxm2         | 0.429492049 | 1.34675932  | 0.041326223 | 0.175850901 | 1.129630464 | 0.37777651  | yes |
| Ccdc94        | 0.430006167 | 1.347239336 | 0.02106906  | 0.148051837 | 1.108072161 | 0.392390858 | yes |
| Gm1821        | 0.433584996 | 1.350585521 | 0.031614605 | 0.164430836 | 1.120723849 | 0.373651098 | yes |
| Lor           | 0.43568648  | 1.352554268 | 0.020221196 | 0.160386243 | 1.117586302 | 0.357563203 | yes |
| Hist1h1c      | 0.438324145 | 1.355029391 | 0.014745222 | 0.165330017 | 1.121422575 | 0.318905399 | yes |
| Nppc          | 0.438514065 | 1.355207783 | 0.039973535 | 0.186851487 | 1.138276848 | 0.355568455 | yes |
| Tagln         | 0.441928848 | 1.358419287 | 0.040834039 | 0.129543378 | 1.093947405 | 0.524172588 | yes |
| Rnf8          | 0.44329052  | 1.359702022 | 0.048308697 | 0.165175873 | 1.121302763 | 0.43793366  | yes |
| 2810029C07Rik | 0.445595822 | 1.361876445 | 0.015245744 | 0.210196215 | 1.156845511 | 0.219070695 | yes |
| Nipsnap3b     | 0.447893109 | 1.364046767 | 0.024598497 | 0.066762546 | 1.047363726 | 0.716893185 | yes |
| Cutc          | 0.450502271 | 1.366515923 | 0.037869869 | 0.257834652 | 1.195682752 | 0.214042978 | yes |
| Pcsk2os2      | 0.451116633 | 1.367097969 | 0.009654837 | 0.234520527 | 1.176515663 | 0.146349486 | yes |
| Bola1         | 0.452212306 | 1.368136623 | 0.040804483 | 0.202029559 | 1.150315462 | 0.335576396 | yes |
| Dtwd1         | 0.454156001 | 1.36998111  | 0.016966346 | 0.111488054 | 1.080341971 | 0.523238769 | yes |
| Bex2          | 0.456252741 | 1.371973619 | 0.004723326 | 0.183183428 | 1.135386449 | 0.198509266 | yes |
| Pla2g4e       | 0.457409468 | 1.373074084 | 0.03034853  | 0.241716769 | 1.182398848 | 0.22791585  | yes |
| Htr1a         | 0.462248114 | 1.37768696  | 0.00491152  | 0.176804706 | 1.13037754  | 0.231496096 | yes |
| Pcdha12       | 0.463958231 | 1.379320987 | 0.046867814 | 0.115737983 | 1.083529162 | 0.598671919 | yes |
| Tnfaip811     | 0.464934388 | 1.380254579 | 0.005267613 | 0.164638178 | 1.12088493  | 0.271180413 | yes |
| Gm6297        | 0.465196805 | 1.380505662 | 0.046762294 | 0.196834873 | 1.14618099  | 0.376028306 | yes |
| Crym          | 0.467085008 | 1.382313654 | 0.009927818 | 0.146384741 | 1.106792476 | 0.358820543 | yes |
| Mzf1          | 0.473143412 | 1.3881307   | 0.014899462 | 0.218765886 | 1.163737673 | 0.226105378 | yes |
| Armcx6        | 0.473273131 | 1.388255519 | 0.049061846 | 0.1174337   | 1.084803471 | 0.60493541  | yes |
| Cntnap3       | 0.474228427 | 1.389175071 | 0.01886717  | 0.176593829 | 1.130212326 | 0.346029795 | yes |
| Smim18        | 0.4744996   | 1.38943621  | 0.039257355 | 0.213538524 | 1.159528696 | 0.327997695 | yes |
| Tacc3         | 0.47740724  | 1.392239334 | 0.027079982 | 0.179912156 | 1.132814907 | 0.373584108 | yes |
| Fbn1          | 0.478823929 | 1.393607148 | 0.045663754 | 0.371940412 | 1.294092203 | 0.111393922 | yes |
| Acta2         | 0.48249799  | 1.397160722 | 0.042334059 | 0.231786596 | 1.174288257 | 0.3042926   | yes |
| 6430584L05Rik | 0.483675993 | 1.398302011 | 0.028914897 | 0.06696584  | 1.047511324 | 0.744432448 | yes |
| Marcks1       | 0.484271552 | 1.398879363 | 0.01197469  | 0.319824487 | 1.248178691 | 0.074411223 | yes |
| Aloxe3        | 0.484887188 | 1.399476429 | 0.043112322 | 0.291201623 | 1.223659041 | 0.206062899 | yes |
| Srd5a1        | 0.486868608 | 1.401399812 | 0.005635845 | 0.170673085 | 1.1255835   | 0.280460584 | yes |
| B230216N24Rik | 0.487576446 | 1.402087558 | 0.012750874 | 0.242709971 | 1.183213133 | 0.182670953 | yes |
| Ethe1         | 0.487911955 | 1.402413661 | 0.015641047 | 0.213521957 | 1.159515381 | 0.254783287 | yes |
| Chchd5        | 0.488341442 | 1.402831219 | 0.029630062 | 0.078469685 | 1.055897421 | 0.706766407 | yes |
| Zfp810        | 0.488947023 | 1.40342019  | 0.009283662 | 0.338622254 | 1.264548397 | 0.057681083 | yes |
| Amdhd2        | 0.489251347 | 1.403716261 | 0.008958851 | 0.270589988 | 1.206301041 | 0.120171121 | yes |
| Slc37a1       | 0.489748145 | 1.40419972  | 0.024917508 | 0.15081029  | 1.110192837 | 0.45793664  | yes |
| Ifitm7        | 0.490679384 | 1.405106403 | 0.015321965 | 0.145002864 | 1.105732848 | 0.426749616 | yes |
| Galns         | 0.491296567 | 1.405707635 | 0.014685836 | 0.294128402 | 1.226143984 | 0.121590267 | yes |
| Cirbp         | 0.496226764 | 1.41051965  | 0.020215138 | 0.34139324  | 1.266979551 | 0.090723335 | yes |
| Ap1s3         | 0.500755799 | 1.414954635 | 0.039440388 | 0.224065665 | 1.168020557 | 0.331188133 | yes |

|               |             |             |             |             |             |             |     |
|---------------|-------------|-------------|-------------|-------------|-------------|-------------|-----|
| Angpt1        | 0.500917834 | 1.415113563 | 0.037514153 | 0.227454481 | 1.170767401 | 0.317332262 | yes |
| 3830408C21Rik | 0.507120216 | 1.421210464 | 0.034918012 | 0.054987608 | 1.03885018  | 0.806167168 | yes |
| Slc16a10      | 0.512325107 | 1.426347104 | 0.031068193 | 0.072952213 | 1.051866937 | 0.74123207  | yes |
| Chac1         | 0.513163649 | 1.427176385 | 0.041495003 | 0.214392516 | 1.160215273 | 0.368066825 | yes |
| Pced1b        | 0.516303207 | 1.430285553 | 0.031257547 | 0.22263304  | 1.166861265 | 0.324503746 | yes |
| Kcnj8         | 0.519506123 | 1.433464447 | 0.030278895 | 0.260077518 | 1.197543049 | 0.252045493 | yes |
| Hdhd3         | 0.523390493 | 1.437329164 | 0.024864978 | 0.211438032 | 1.157841708 | 0.332923803 | yes |
| S100a11       | 0.53050102  | 1.444430731 | 0.024027867 | 0.148381644 | 1.108325501 | 0.496469684 | yes |
| Tipin         | 0.532262961 | 1.44619587  | 0.014625106 | 0.238773719 | 1.179989252 | 0.238130295 | yes |
| 1700018L02Rik | 0.535808751 | 1.449754635 | 0.019563469 | 0.311684441 | 1.241155985 | 0.151275015 | yes |
| Ciart         | 0.537009796 | 1.45096206  | 0.00668036  | 0.297882644 | 1.229338862 | 0.103968372 | yes |
| Exo5          | 0.539461531 | 1.453429941 | 0.015442234 | 0.169004448 | 1.12428239  | 0.409304378 | yes |
| Zcchc16       | 0.54156698  | 1.455552605 | 0.048524358 | 0.077822007 | 1.055423496 | 0.763240399 | yes |
| 4930413G21Rik | 0.55203259  | 1.466149876 | 0.024600575 | 0.27414072  | 1.209273622 | 0.23479071  | yes |
| Lyplal1       | 0.555948863 | 1.470135226 | 0.013648586 | 0.212307014 | 1.158539324 | 0.306728919 | yes |
| C8g           | 0.558640557 | 1.472880676 | 0.044375431 | 0.2273712   | 1.17069982  | 0.388271695 | yes |
| Nudt8         | 0.564084367 | 1.478448886 | 0.010532417 | 0.159675058 | 1.117035517 | 0.425502929 | yes |
| Col5a2        | 0.566596287 | 1.481025301 | 0.017385327 | 0.125292675 | 1.090728983 | 0.566524251 | yes |
| E130317F20Rik | 0.570390242 | 1.484925181 | 0.04606483  | 0.234175845 | 1.176234608 | 0.388213964 | yes |
| Phf7          | 0.580094632 | 1.494947305 | 0.047960266 | 0.171785872 | 1.126452025 | 0.535468672 | yes |
| Ninl          | 0.580401814 | 1.495265647 | 0.007691886 | 0.253097743 | 1.191763314 | 0.202332579 | yes |
| Wdr5b         | 0.580508988 | 1.49537673  | 0.024115937 | 0.27073143  | 1.206419314 | 0.26312295  | yes |
| Naglu         | 0.584404376 | 1.499419818 | 0.013400583 | 0.262407103 | 1.199478337 | 0.230358695 | yes |
| Bex1          | 0.586893457 | 1.502009    | 0.007351644 | 0.27972527  | 1.213963689 | 0.153273046 | yes |
| Eln           | 0.586975995 | 1.502094933 | 0.030201657 | 0.265609407 | 1.202143738 | 0.294160861 | yes |
| Opn3          | 0.589462325 | 1.504685864 | 0.007773431 | 0.197866372 | 1.147000779 | 0.323611423 | yes |
| Bbc3          | 0.596149205 | 1.511676259 | 0.023002662 | 0.266359024 | 1.202768529 | 0.277964638 | yes |
| Aldh1a3       | 0.599416338 | 1.515103487 | 0.009608633 | 0.189625729 | 1.140467812 | 0.367269651 | yes |
| 1600029O15Rik | 0.605462251 | 1.521466166 | 0.032964136 | 0.121768611 | 1.088067916 | 0.645677222 | yes |
| Neurl2        | 0.606635115 | 1.52270357  | 0.021254308 | 0.272811577 | 1.208160041 | 0.268467399 | yes |
| Usp43         | 0.610614474 | 1.526909413 | 0.011866136 | 0.278128685 | 1.212620977 | 0.215278577 | yes |
| Cited4        | 0.613115014 | 1.529558212 | 0.009596487 | 0.358260168 | 1.281879071 | 0.105572144 | yes |
| 4732491K20Rik | 0.614864103 | 1.531413737 | 0.034725936 | 0.327314551 | 1.254675731 | 0.237609594 | yes |
| Sfrp2         | 0.615321221 | 1.531899042 | 0.046073147 | 0.26858555  | 1.204626206 | 0.359833471 | yes |
| Slc7a3        | 0.625240102 | 1.542467511 | 0.00518401  | 0.23111204  | 1.173739328 | 0.247226413 | yes |
| Casp7         | 0.625608758 | 1.542861713 | 0.024350438 | 0.192160982 | 1.142473722 | 0.457015545 | yes |
| 1700101111Rik | 0.628479727 | 1.54593507  | 0.035822681 | 0.30691547  | 1.237059995 | 0.271646007 | yes |
| Scarf2        | 0.637063537 | 1.55516056  | 0.026805299 | 0.354322208 | 1.278384843 | 0.1944742   | yes |
| Sema3b        | 0.642036841 | 1.56053081  | 0.030903984 | 0.290364399 | 1.222949134 | 0.301031657 | yes |
| Aldh1a2       | 0.653730802 | 1.573231308 | 0.009012251 | 0.372408119 | 1.294511802 | 0.110203751 | yes |
| Gm10790       | 0.664285162 | 1.584782837 | 0.038918827 | 0.043988538 | 1.030960128 | 0.883643211 | yes |
| Slc41a3       | 0.665801288 | 1.586449159 | 0.004291507 | 0.27056853  | 1.2062831   | 0.196618847 | yes |

|               |             |             |             |             |             |             |     |
|---------------|-------------|-------------|-------------|-------------|-------------|-------------|-----|
| Acot6         | 0.675250989 | 1.596874561 | 0.020719216 | 0.205491043 | 1.153078748 | 0.447111836 | yes |
| Pcdhb8        | 0.67840829  | 1.600373106 | 0.042873844 | 0.249186534 | 1.188536768 | 0.431580556 | yes |
| Adrb3         | 0.684282106 | 1.606902178 | 0.008048613 | 0.322588881 | 1.250572659 | 0.173929524 | yes |
| Adcy10        | 0.687950741 | 1.610993576 | 0.043118875 | 0.050163889 | 1.035382536 | 0.874940697 | yes |
| Pycard        | 0.704594417 | 1.629686448 | 0.039533552 | 0.151642167 | 1.110833173 | 0.636592196 | yes |
| Slc16a5       | 0.721824392 | 1.649266333 | 0.023866814 | 0.170503372 | 1.125451098 | 0.564436227 | yes |
| Rdh5          | 0.734884455 | 1.664264174 | 0.040690378 | 0.366578056 | 1.289291118 | 0.283682522 | yes |
| Msx1os        | 0.747170493 | 1.678497622 | 0.013082758 | 0.314989132 | 1.244002282 | 0.257460936 | yes |
| Cfap61        | 0.778785876 | 1.715686401 | 0.047132076 | 0.054027888 | 1.038159339 | 0.883436519 | yes |
| Ccdc110       | 0.786421703 | 1.724791177 | 0.043139258 | 0.210359121 | 1.156976147 | 0.565611795 | yes |
| Bambi-ps1     | 0.822342557 | 1.768274875 | 0.018080063 | 0.186267753 | 1.137816378 | 0.560045037 | yes |
| Nlrp6         | 0.846503501 | 1.798137694 | 0.030284874 | 0.303782361 | 1.23437638  | 0.407002952 | yes |
| Aox3          | 0.866688597 | 1.823472695 | 0.018641078 | 0.325222261 | 1.252857439 | 0.340814088 | yes |
| Map2k3os      | 0.875709907 | 1.834910769 | 0.031916994 | 0.219734504 | 1.164519263 | 0.564250405 | yes |
| Llgl2         | 0.893571197 | 1.857769094 | 0.031710733 | 0.325718447 | 1.253288408 | 0.404324637 | yes |
| Ahrr          | 0.939548044 | 1.917927311 | 0.031190151 | 0.136515138 | 1.099246652 | 0.736377699 | yes |
| 1700001G11Rik | 1.066738244 | 2.094692169 | 0.03633697  | 0.372684465 | 1.294759788 | 0.436725228 | yes |
| Ctcf1         | 1.187112402 | 2.276965452 | 0.028565106 | 0.292567283 | 1.224817909 | 0.562141328 | yes |
| Acr           | 1.188498616 | 2.279154327 | 0.003831537 | 0.385357533 | 1.306183449 | 0.29095321  | no  |
| Birc3         | 0.561081394 | 1.475374692 | 0.047155825 | 0.397268648 | 1.317012144 | 0.147662336 | no  |
| Gjb2          | 0.631146972 | 1.548795828 | 0.029978548 | 0.45294754  | 1.368834038 | 0.104472358 | no  |
| Cd74          | 0.655892016 | 1.575589836 | 0.024118258 | 0.44823706  | 1.364372006 | 0.108396377 | no  |
| Serping1      | 0.660311197 | 1.580423493 | 0.011428913 | 0.487178733 | 1.401701092 | 0.051429514 | no  |
| Mxra8         | 0.681466337 | 1.603768977 | 0.013722427 | 0.422058823 | 1.33983823  | 0.106248487 | no  |
| Dcn           | 0.703289541 | 1.628213111 | 0.003896096 | 0.40425799  | 1.323408077 | 0.07003554  | no  |
| Bche          | 0.706507736 | 1.631849192 | 0.017108122 | 0.594331037 | 1.509772357 | 0.039706175 | no  |
| Capg          | 0.746574872 | 1.677804793 | 0.045450029 | 0.485797938 | 1.400360174 | 0.177543266 | no  |
| Eya2          | 0.760451621 | 1.694020837 | 0.047452029 | 0.44223553  | 1.358708085 | 0.230190699 | no  |
| Slc13a4       | 0.789523691 | 1.728503699 | 0.012971215 | 0.555693256 | 1.46987478  | 0.064312892 | no  |
| Mgp           | 0.824429133 | 1.77083419  | 0.001280112 | 0.504902183 | 1.419027141 | 0.028955869 | no  |
| Ccl28         | 0.84889528  | 1.801121218 | 0.02599385  | 0.573954399 | 1.488598202 | 0.115682178 | no  |
| Clec3b        | 0.855205727 | 1.809016701 | 0.012695166 | 0.38173393  | 1.302906838 | 0.229314649 | no  |
| Gm10638       | 0.924283545 | 1.897741573 | 0.020735681 | 0.448134452 | 1.364274973 | 0.232137086 | no  |
| Ahcy          | 0.958889107 | 1.943812559 | 0.022884657 | 0.432052637 | 1.349151758 | 0.242555413 | no  |
| 3110070M22Rik | 1.009315092 | 2.012955239 | 0.028370525 | 0.829218738 | 1.776722954 | 0.065349671 | no  |
| Arr3          | 1.021889351 | 2.030576459 | 0.025020023 | 0.385414203 | 1.306234758 | 0.36571008  | no  |
| Sec14l3       | 1.027818719 | 2.038939148 | 0.010030297 | 0.449418243 | 1.365489521 | 0.22091792  | no  |
| Gm16712       | 1.037354941 | 2.052461189 | 0.039864677 | 0.597741965 | 1.513346097 | 0.215778938 | no  |
| Wnt6          | 1.046855374 | 2.066021652 | 0.048298394 | 0.776371838 | 1.712817971 | 0.132332156 | no  |
| Gpr39         | 0.47275211  | 1.387754249 | 0.001352075 | 0.281796273 | 1.215707598 | 0.033879742 | no  |
| 4933409K07Rik | 1.073513243 | 2.104552126 | 0.017341885 | 0.420002738 | 1.337930094 | 0.315490912 | no  |
| H2-Eb1        | 1.081988389 | 2.116951752 | 0.008752855 | 0.598542772 | 1.514186354 | 0.118810305 | no  |

|               |             |             |             |             |             |             |    |
|---------------|-------------|-------------|-------------|-------------|-------------|-------------|----|
| Ptgrf         | 1.127460536 | 2.18473839  | 0.036349898 | 0.675803229 | 1.597485935 | 0.190037416 | no |
| O610039K10Rik | 1.180220145 | 2.266113537 | 0.020074753 | 0.457676457 | 1.373328212 | 0.309351287 | no |
| Lypd1         | 0.502876008 | 1.417035604 | 0.000583743 | 0.271327238 | 1.206917647 | 0.034063982 | no |
| Ctxn3         | 1.273132165 | 2.416857085 | 0.012565211 | 0.512949925 | 1.426964976 | 0.275101833 | no |
| Rbm3os        | 1.292612975 | 2.449713402 | 0.04197174  | 0.721545931 | 1.648948032 | 0.223000289 | no |
| Hmga2         | 1.334281226 | 2.521498253 | 0.019830027 | 0.663397048 | 1.583807556 | 0.2110564   | no |
| Gm15421       | 1.376167759 | 2.595779358 | 0.007660707 | 0.594318    | 1.509758714 | 0.207497377 | no |
| Gm9833        | 1.415295781 | 2.667144115 | 0.03749291  | 0.876381628 | 1.835765305 | 0.17467039  | no |
| Rpl31-ps12    | 2.577914247 | 5.970758623 | 0.048347921 | 1.218204299 | 2.326569524 | 0.295333793 | no |

**Suppl. Table 7. Detailed information about donors**

| umbn  | GUID             | RIN | BrainWeight | DISORDER     | CDEATHOFF                                 | AGE years | AGE days | sex    | race             | HIV               | HBSAG             | PMINTERVAL | HISTORYREC                                                                                                                                                                                                                                                                                                                                                                                                                                                                                                                                                                                                                                                                                                                                                                                                                                                              |
|-------|------------------|-----|-------------|--------------|-------------------------------------------|-----------|----------|--------|------------------|-------------------|-------------------|------------|-------------------------------------------------------------------------------------------------------------------------------------------------------------------------------------------------------------------------------------------------------------------------------------------------------------------------------------------------------------------------------------------------------------------------------------------------------------------------------------------------------------------------------------------------------------------------------------------------------------------------------------------------------------------------------------------------------------------------------------------------------------------------------------------------------------------------------------------------------------------------|
| -3228 | NDAR_INVGN971WMY |     | 1420        | Control      | Internal Bleeding                         | 11        | 294      | Male   | Caucasian        | (no test results) | (no test results) | 20         | The decedent was an eleven year old Caucasian male whose cause of death was attributable to internal bleeding.<br>Neuropathology Diagnosis: Brain petechiae and hematoma, recent.<br>The brain weight is 1420 grams.                                                                                                                                                                                                                                                                                                                                                                                                                                                                                                                                                                                                                                                    |
| 1714  | NDAR_INVNV958VDC |     | 1400        | Control      | Cardiac Arrhythmia                        | 12        | 164      | Male   | African American | Negative          | Negative          | 22         | Individual was found by his mother unresponsive on the floor of the upstairs bedroom. Victim transported to hospital where he was pronounced dead. Individual had high cholesterol. Hospital x-rays revealed that the victim had an enlarged heart.                                                                                                                                                                                                                                                                                                                                                                                                                                                                                                                                                                                                                     |
| 4332  | NDAR_INVTR103GCU | 7.4 |             | Control      | Pseudomonas Brochopneumonia               | 5         | 241      | Male   | African American | (no test results) | (no test results) | 18         | Donor was a five-year-old African-American boy with a past medical history significant for Philadelphia (bcr-abl) positive ALL. He had CNS, hematological and testicular relapse and was treated with reinduction, consolidation therapy, testicular and CNS radiation. He developed Pseudomonas bronchopneumonia and passed away in the hospital.<br>NEUROPATHOLOGY FINAL DIAGNOSIS: Normal brain and spinal cord.                                                                                                                                                                                                                                                                                                                                                                                                                                                     |
| 4334  | NDAR_INVKL967BB5 | 7.1 | 1450        | ASD - Autism | Acute Hemorrhagic Tracheobronchitis       | 11        | 17       | Male   | Hispanic         | (no test results) | (no test results) | 27         | Donor was an 11 year old male with a history of Autism who was found unresponsive by his parents. He had a fever and cold symptoms and was treated at the hospital 5 days prior to death. Donor also had a history of Epilepsy. NEUROPATHOLOGY IMPRESSION: Brain edema, acute, mild. Otherwise normal brain. ADI-R was performed. Section A=36, Section B verbal=9, Section B nonverbal=9, Section C=6 & Section D=4.                                                                                                                                                                                                                                                                                                                                                                                                                                                   |
| 4787  | NDAR_INVXT992PRB | 6.9 | 1470        | Control      | Asthma                                    | 12        | 318      | Male   | African American | Negative          | Negative          | 15         | Donor was a 12 year old African American male with a history of asthma and peanut and apple allergies. His current medications included Singulair, Albuteral, Prednisone and Claritin.                                                                                                                                                                                                                                                                                                                                                                                                                                                                                                                                                                                                                                                                                  |
| 5112  |                  |     | 1430        | Control      | Occlusive Pulmonary Thromboembolism       | 16        | 190      | Male   | Caucasian        | Negative          | Negative          | 27         | abnormal blood clots.                                                                                                                                                                                                                                                                                                                                                                                                                                                                                                                                                                                                                                                                                                                                                                                                                                                   |
| 5144  | NDARBM537WBK     | 7.7 | 1311        | ASD - Autism | Cancer, Complications of                  | 7         | 55       | Male   | Caucasian        | (no test results) | (no test results) | 3          | Donor died at 7 years of age. He had the clinical diagnosis of Autism (NOS) and suffered Rhabdomyosarcoma. FINAL NEUROPATHOLOGIC DIAGNOSIS Normal brain (clinical diagnosis of Autism). ADI-R was performed. Section A=28, Section B verbal=20, Section B nonverbal=12, Section C=3 & Section D=3.                                                                                                                                                                                                                                                                                                                                                                                                                                                                                                                                                                      |
| 5278  | NDARYH540PL4     | 6.9 | 1417        | ASD - Autism | Drowning associated with seizure disorder | 15        | 324      | Female | Caucasian        | Negative          | Negative          | 13         | Donor was a 15 year old girl who drowned in the bathtub. Donor had a history of autism and generalized epilepsy. Current medications included Depakote, Keppra, Vitamin B6 and Prozac. Donor received special services in school and speech therapy. Family history is positive for a second cousin with autism and great uncle with mental illness. FINAL NEUROPATHOLOGICAL DIAGNOSIS No significant neuropathological changes, see comment. ADI-R was performed. Section A=22, Section B verbal=21, Section B nonverbal=11, Section C=5 & Section D=5.                                                                                                                                                                                                                                                                                                                |
| 5308  | NDAR_INVGG735JVA | 6   | 1310        | ASD - Autism | Skull fractures                           | 4         | 182      | Male   | Caucasian        | (no test results) | (no test results) | 21         | Donor died from blunt force head injuries resulting as a pedestrian struck by a car. Donor had the diagnosis of autism and reportedly ran after cars. Head injuries sustained at the accident included external facial abrasions, a depressed left temporal fracture, fractures of bilateral temporal lobes and petrous ridges and sell turcica. FINAL NEUROPATHOLOGIC DIAGNOSIS 1. Blunt force head injuries: a) Multifocal subarachnoid hemorrhage. b) Intermediate contusions, cerebral white matter tracts and brainstem 2. Possible microdysgenesis, temporal lobe (clinical diagnosis of Autism) ADI-R was performed. Section A=17, Section B verbal=14, Section B nonverbal=14, Section C=4 & Section D=3.                                                                                                                                                       |
| 5334  | NDAR_INVJJ928MHF | 2.4 |             | Control      | Hanging / Suicide                         | 12        | 249      | Male   | Hispanic         | Negative          | (no test results) | 15         | Donor was a 12 year old male who hung himself with a belt. Donor did not have history of depression. Donor did not use any drugs or alcohol.                                                                                                                                                                                                                                                                                                                                                                                                                                                                                                                                                                                                                                                                                                                            |
| 5387  | NDAR_INVZH674MR7 | 7.5 |             | Control      | Drowning                                  | 12        | 297      | Male   | Caucasian        | (no test results) | (no test results) | 13         | Donor was a 12-year-old male who drowned in his swimming pool.<br>FINAL NEUROPATHOLOGIC DIAGNOSIS: Brain with no significant gross or microscopic findings (non-neurologic control).                                                                                                                                                                                                                                                                                                                                                                                                                                                                                                                                                                                                                                                                                    |
| 5403  | NDARCD583TG7     | 5.5 | 1777        | ASD - Autism | Cardiac Arrhythmia                        | 16        | 266      | Male   | Caucasian        | Negative          | Negative          | 35         | The donor had extensive psychological testing which can be found in the medical records indicating his developmental delays. He also had extensive GI evaluations.<br>FINAL NEUROPATHOLOGICAL DIAGNOSIS: No significant changes.<br>Brain weight: 1777g. ADI-R was performed. Section A=30, Section B verbal=n/a, Section B nonverbal=14, Section C=5 & Section D=5. Phenotyping by NIH.                                                                                                                                                                                                                                                                                                                                                                                                                                                                                |
| 5408  | NDAR_INVAP772ER7 | 7.6 | 1320        | Control      | Drowning                                  | 6         | 309      | Male   | African American | Negative          | Negative          | 16         | Donor drown in a swimming pool while at a family party. Donor did not take any medication, had no allergies and no medical history. Autopsy report findings: 6 y.o. African American male died of drowning. Pathologic Diagnoses: I. Drowning A. Pulmonary congestion and edema B. Body found submerged in swimming pool C. No evidence of trauma.                                                                                                                                                                                                                                                                                                                                                                                                                                                                                                                      |
| 5454  | NDAR_INVBG420UL2 | 4.8 | 1390        | ASD - Autism | Toxic Megacolon                           | 11        | 62       | Male   | Caucasian        | Negative          | Negative          | 20         | Diagnosis based on medical records and ADOS. ADI-R not available. Based upon review of a psycho-educational assessment which included the Autism Diagnostic Observation Schedule, the donor meets criteria for a diagnosis of autism.<br>Findings from autopsy report/medical examiners report: Donor was found unresponsive at home following a two day history of vomiting, diarrhea, and fevers up to 104 degrees. Donor was being treated at home with Children's Motrin, which helped decrease the fever. At autopsy, there was significant distension and dusky-dark discoloration of the external surfaces of the small and large bowels, indicating ischemia (insignificant blood flow) of the tissue.<br>Neuropathology Report: Unremarkable pediatric brain by gross and microscopic examination.<br>Toxicology analyses were negative for drugs and alcohol. |

|      |                  |     |      |              |                                 |    |     |        |                  |                   |                   |    |                                                                                                                                                                                                                                                                                                                                                                                                                                                                                                                                                                                                                                                                                                                                                                                                                                                                                                                                                                                                                                                                                                                                                                                                                                                                                                                                                                                                                                                                      |
|------|------------------|-----|------|--------------|---------------------------------|----|-----|--------|------------------|-------------------|-------------------|----|----------------------------------------------------------------------------------------------------------------------------------------------------------------------------------------------------------------------------------------------------------------------------------------------------------------------------------------------------------------------------------------------------------------------------------------------------------------------------------------------------------------------------------------------------------------------------------------------------------------------------------------------------------------------------------------------------------------------------------------------------------------------------------------------------------------------------------------------------------------------------------------------------------------------------------------------------------------------------------------------------------------------------------------------------------------------------------------------------------------------------------------------------------------------------------------------------------------------------------------------------------------------------------------------------------------------------------------------------------------------------------------------------------------------------------------------------------------------|
| 5531 | NDAR_INVJR095LBJ | 6.3 | 1641 | Pending      | Staphylococcus Aureus Pneumonia | 15 | 136 | Male   | Caucasian        | (no test results) | (no test results) | 32 | <p>We were unable to complete the ADIR with the family. Medical &amp; school records confirm Autism.</p> <p>Medical Examiners Opinion: This is a 15-year-old white adolescent male died of staphylococcus aureus sepsis with myocarditis and necrotizing pneumonia. Per report the decedent had a history of autism and had been experiencing fever in the days preceding death. Olanzapine toxicity and autism were significant contributory conditions. Autopsy demonstrated an overwhelming acute infection that impacted the lungs and the heart and also affected all his other organs making it difficult for his liver and kidneys to clear the olanzapine from his system. Microbiology studies demonstrated the organism growing from his lungs and cerebrospinal fluid to be methicillin-resistant. Staphylococcus aureus also known as MRSA, with the source most likely one of the many excoriations on his body. It is also possible that his autism made detection of the infection difficult. The manner of death is NATURAL. The deceased had not been consuming alcoholic beverages prior to death.</p> <p>Final Neuropathologic Diagnosis:<br/>I. History of Autism<br/>II. Focal acute changes suggestive of minor head trauma (see comment)</p> <p>Comment: The small acute contusion and the small collection of subarachnoid blood at the right occipital pole are consistent with minor head trauma around the time of death (e.g. fall).</p> |
| 5566 | NDAR_INVEN957VTL | 8.3 | 1505 | ASD - Autism | Seizure Disorder, Complications | 12 | 89  | Male   | African American | Negative          | Negative          | 22 | <p>The donor's Vineland Adaptive Behavior Scale at aged 9 were: Communication 53, daily living skills 73, socialization 59, adaptive behavior 62. The Guilliam Autism Rating Scale-2nd Ed (GARS-2) is consistent with a high likelihood of autism. Mother reports donor has history of seizures, non-verbal, and autism. Has had frequent seizures with most recent incident happening one week prior to death. He has a twin brother with a milder form of ASD. Three older children are normal. Mother's cousin has two children with ASD. Pathologic Diagnoses concludes that subject died due to a seizure disorder complicated by cardiac conduction system abnormalities. Subject obtained seizure disorder due to a fall in 2006. Medical Examiners Opinion: This 12 year old African American male died of SEIZURE DISORDER COMPLICATED BY CARDIAC CONDUCTION SYSTEM ABNORMALITIES. Microscopic examination of the conduction system of the heart shows a possible accessory conduction pathway as well as focal scarring (fibrosis). Either of these findings has the potential to contribute to a cardiac arrhythmia. The manner of death is ACCIDENT. Medical records and ADI-R were reviewed. ADI-R was performed. Section A=27, Section B verbal=n/a, Section B nonverbal=17, Section C=5 &amp; Section D=4. Phenotyping by NIH.</p>                                                                                                                    |
| 5566 | NDAR_INVHN549AL2 |     | 1150 | Control      | Hypertrophic Cardiomyopathy     | 15 | 303 | Female | African American |                   |                   | 23 | <p>Pathologic Diagnosis: Cardiomegaly, 520 g (normal 266g, upper limit 410g). Left ventricular hypertrophy with asymmetrical septal enlargement. Myofiber disarray in left ventricular free wall and septum.</p> <p>Negative for ethanol and drugs.</p>                                                                                                                                                                                                                                                                                                                                                                                                                                                                                                                                                                                                                                                                                                                                                                                                                                                                                                                                                                                                                                                                                                                                                                                                              |
| 5841 |                  | 6.5 | 1450 | ASD - Autism | Suicide, Hanging                | 12 | 187 | Male   | Caucasian        | (no test results) | (no test results) | 15 | <p>ASD confirmed by medical records and ADI-R. More information to be entered. New case. Subject has a hx of Asperger syndrome and mild autism. No hx of falls, trauma, drugs, ETOH, or seizures.</p> <p>Final NP Findings:<br/>Microscopic Description- no acute or traumatic lesions are identified.<br/>-unremarkable brain<br/>Autopsy Pathologic Diagnoses:<br/>I. Hanging<br/>a. ligature furrow partially encircling neck<br/>b. scene investigation<br/>Toxicology Report of Findings:<br/>Subject tested negative for Ethanol and drugs.</p>                                                                                                                                                                                                                                                                                                                                                                                                                                                                                                                                                                                                                                                                                                                                                                                                                                                                                                                |
| 5879 |                  | 6.9 | 1580 | Control      | Asphyxia By Hanging             | 15 | 11  | Male   | African American | (no test results) | (no test results) | 18 | <p>Decedent was reportedly very upset when he was not allowed to play football at his school due to a sports related injury. He wrote a 2 page suicide note and sent a text to a friend advising him what he was going to do. The NOK found him hanging from a basketball hoop bracket by a belt. Decedent had no known prior suicidal ideations or attempts.</p> <p>Autopsy Findings:<br/>The 15-year-old subject died of asphyxia by hanging, based on the investigation and autopsy findings, the manner of death is classified as suicide.</p> <p>Toxicology Report of Findings:<br/>Decedent tested negative for Ethanol and other drugs.</p> <p>Neuropath report findings: No acute or traumatic lesions are identified. All sections were stained for Tau immunohistochemistry and were negative. Unremarkable brain.</p>                                                                                                                                                                                                                                                                                                                                                                                                                                                                                                                                                                                                                                     |
| 5978 |                  | 6.7 | 1633 |              | Smoke Inhalation                | 11 | 158 | Male   | Caucasian        | Negative          | Negative          | 21 | <p>The ADI-R was conducted with the donor's grandmother. According to the results of the ADI-R diagnostic algorithm, the donor's impairments in social interaction, communication, and repetitive/stereotyped behaviors and interests are consistent with a diagnosis of autism. A: Qualitative Abnormalities in Reciprocal Social Interaction=13, B: Qualitative Abnormalities in Communication: Verbal= 15, Nonverbal= NA, C: Restricted, Repetitive, and Stereotyped Patterns of Behavior= 9 and D: Abnormality of Development Evident at or before 36 months=3. Subject was involved in a house fire, intubated in field by EMS, then taken to ER. Pt was pulseless, CPR performed 20+ min in the ER, Pt died shortly after. Subject has a hx of Autism, craniial reconstruction-soft spot closed @ age 7, flu shot 6 mo ago prior to death, and poor vision. Subject tested negative for HIV 1 Ab test, HIV 2 Ab test, RPR Syphilis Test, HCV Ab test, HBc Ab test, and HBs Ag test.</p> <p>Final Neuropathologic Diagnosis: unremarkable brain.</p>                                                                                                                                                                                                                                                                                                                                                                                                            |

**Supplemental Table 8. Primers used for PCR**

|                     | Gene ID                 | Forward sequence         | Reverse sequence        |
|---------------------|-------------------------|--------------------------|-------------------------|
| <i>Mus musculus</i> | <i>Ehmt1</i>            | CATAGCAAAGCAGACACAA      | ACTTTCCAAGGTTTCCTTTC    |
|                     | <i>Ehmt2</i>            | GCTCCACCTGTCTACATCAT     | GCAGATGTTTTCCCTCATTGT   |
|                     | <i>Kmt1b</i>            | TTCACAGTGGATGCAGCTCG     | TGCTTCTCCAGAACCTTTCATT  |
|                     | <i>Kmt1a</i>            | AACATGCAAGTGGACCCCG      | GGTATTTTCGGCAAGCCGTT    |
|                     | <i>Setdb1</i>           | ACCCGTCCTAATATGGGTGCT    | AGCTTTCAGTGTGCTGCTGCT   |
|                     | <i>Ezh1</i>             | AAAGTCAACACTTCCCGCTG     | CATACAGAGCCTTTGCTCCCA   |
|                     | <i>Ezh2</i>             | ACTGCTTCCTACATCCCTTCC    | GTGCTGGGTCTGCTACTGTT    |
|                     | <i>Ash1l</i>            | GGGCACGAGAAGGATGATGA     | TCATGGGTACCTCCCTGTCC    |
|                     | <i>Kmt2C</i>            | TGTGAACAAGGGTTCCTGAG     | GGGAGACAGTGCACATCCAA    |
|                     | <i>Setd5</i>            | GCGTATCACCCTGACCCAA      | ATCCAGCGCTTCTTACAGGA    |
|                     | <i>Chd8</i>             | GACCGAGGAGCAGGTTCAA      | TACGGGTGATTGCAGCACTT    |
|                     | <i>Ank2</i>             | ATACCATCCTCATCGAATGC     | CTAGACTCGTTTTCTTTGGA    |
|                     | <i>Syngap1</i>          | TTATCAAGCCAGTACACAGC     | GGCACAGCTCACAGTAATAT    |
|                     | <i>Cttnbp2</i>          | CGATGTTTCTGACGACTTTG     | AAATGTCCCATCTTCCAGAC    |
|                     | <i>Cttn</i>             | GATAGGATGGACAGATCAGC     | AGAGTAGTCTTTCTGGGAGG    |
|                     | <i>Arc</i>              | GAGGCTCAGCAATATCAGTC     | GGACAGCCAATATTCTTCAG    |
|                     | <i>Grin1</i>            | CATCGGACTTCAGCTAATCA     | GTCCCCATCCTCATTGAATT    |
|                     | <i>Grin2a</i>           | GGCTACAGAGACTTCATCAG     | ATCCAGAAGAAATCGTAGCC    |
|                     | <i>Grin2b</i>           | TTAACAACCTCCGTACCTGTG    | TGGAACCTCTTGCTCACTCAG   |
|                     | <i>Gria1</i>            | GCCTTAATCGAGTTCTGCTA     | GAATGGATTGCATGGACTTG    |
|                     | <i>Gria2</i>            | AGCCTATGAGATCTGGATGT     | GAGAGAGATCTTGGCGAAAT    |
|                     | <i>Shank3</i>           | GATCTGCCATCCCTACAAC      | AGCTAAGGGTGAGCTAGGAT    |
|                     | <i>Camk2b</i>           | CAGATGGAGTCAAGCCCAG      | TTGTGTTGGTGCTGTCCGAA    |
|                     | <i>Cyfp1</i>            | CACTTACTGAACTGATGGCTGC   | CTGATAGAGCAGCGAGGACG    |
|                     | <i>Camk2a</i>           | CAGCATCCCAGCCCTAGTTC     | GAGAAGGCTCCCTTTCCAG     |
|                     | <i>Homer1</i>           | AACACAAAGAAGAAGTGGGT     | ATTGCCTTTGAGCCATCTAA    |
|                     | <i>Gapdh</i>            | GACAACCTCCCTCAAGATTGTCAG | ATGGCATGGACTGTGGTCATGAG |
|                     | <i>Acan</i>             | CCGTTGCAGACATTGACGAG     | AGGTTCCCTCTGTAGCTCGG    |
|                     | <i>Lrrc26</i>           | CGAGGCGGGTTTGCTGAATA     | TCAGTTTCTGAGGCTGGACGC   |
|                     | <i>Zfx3</i>             | GCCTGGGGTGGGTAAGTTC      | ATCGGACCTGGCACACAAAG    |
|                     | <i>Adgrl4</i>           | TCCCGCTTCTAGTGGGTTTC     | CCACACCATTGTGCACTTCG    |
|                     | <i>Gabra2</i>           | CAGCAAGAAGTGTGTTGGAGT    | ACTACACTCTTCCCGTCCCA    |
| <i>Homo sapiens</i> | <i>EHMT1</i>            | GGACGGAATTGACCCCACT      | AATATTAGCGCCCGCCTGAA    |
|                     | <i>EHMT2</i>            | CTGACAACGAGGAGAACATCTG   | AACAGCACGCAGTCATGGTA    |
|                     | <i>KMT1B</i>            | AGGCGCGAGGAGCTTGG        | ACGGGCACTTCAAGTTTTGC    |
|                     | <i>KMT1A</i>            | TGGAGTACGTGGGAGAGATCA    | TGTGGCAAAGAAAGCGATGC    |
|                     | <i>SETDB1</i>           | TATCGAGGCTCTACACGGCT     | TGCTCCTCACAGCACCATA     |
|                     | <i>EZH1</i>             | TTCCTGGTCCCCTCTCCAAC     | AGGGATCATCTCTTCTTACCA   |
|                     | <i>KMT2C</i>            | ACTCCCTGGTCTCTGTTGGT     | AGGAGATCGTCTTTTCTCTGTCC |
|                     | <i>SETD5</i>            | TGGGGATAGCAGTGAACAG      | TCCCTCTCGAAATGCCTTGA    |
| <i>GAPDH</i>        | GACAACAGCCTCAAGATCATCAG | ATGGCATGGACTGTGGTCATGAG  |                         |
